# Supplementary material
Source: PubMed Central journal article supplement (PMC3702164)

## Supporting Information

# Chlorizidine, A Cytotoxic 5*H*-Pyrrolo[2,1-*a*]isoindol-5-one-Containing Alkaloid from a Marine *Streptomyces* sp.

Xavier Alvarez-Mico, Paul R. Jensen, William Fenical, Chambers C. Hughes\*

*Center for Marine Biotechnology and Biomedicine, Scripps Institution of Oceanography, University of California—San Diego, La Jolla, CA 92093-0204*

|                                                                              | <u>Page</u> |
|------------------------------------------------------------------------------|-------------|
| General experimental                                                         | S4          |
| Phylogeny of strain CNH-287                                                  | S4          |
| <b>Figure S1.</b> Phylogenetic tree for strain CNH-287                       | S5          |
| Cultivation of strain CNH-287                                                | S5          |
| Isolation and purification of chlorizidine A ( <b>1</b> ) and B ( <b>7</b> ) | S5          |
| Preparation of compounds <b>2-6</b> and <b>8-14</b>                          | S6          |
| <b>Figure S2.</b> HMBC correlations for chlorizidine A ( <b>1</b> )          | S11         |
| Tabulated NMR data for compounds <b>2-10</b> ( <b>Tables S1-S4</b> )         | S12         |
| Chlorizidine A ( <b>1</b> )                                                  |             |
| <sup>1</sup> H NMR spectrum (500 MHz, CD <sub>3</sub> CN)                    | S16         |
| COSY spectrum (500 MHz, CD <sub>3</sub> CN)                                  | S17         |
| HSQC spectrum (500 MHz, CD <sub>3</sub> CN)                                  | S18         |
| HMBC spectrum (500 MHz, CD <sub>3</sub> CN)                                  | S19         |
| <sup>13</sup> C NMR spectrum (75 MHz, CD <sub>3</sub> CN)                    | S20         |
| UV/vis spectrum (CH <sub>3</sub> CN)                                         | S21         |
| HRESI-FT-MS (Orbit-Trap-MS)                                                  | S22         |
| Diacetyl chlorizidine A ( <b>2</b> )                                         |             |
| <sup>1</sup> H NMR spectrum (500 MHz, DMSO- <i>d</i> <sub>6</sub> )          | S23         |
| <sup>13</sup> C NMR (125 MHz, DMSO- <i>d</i> <sub>6</sub> )                  | S24         |
| UV/vis spectrum (CH <sub>3</sub> CN)                                         | S25         |
| HRESI-FT-MS (Orbit-Trap-MS)                                                  | S26         |

|                                                                        |     |
|------------------------------------------------------------------------|-----|
| Dimethyl chlorizidine A ( <b>3</b> )                                   |     |
| <sup>1</sup> H NMR spectrum (500 MHz, DMSO- <i>d</i> <sub>6</sub> )    | S27 |
| <sup>13</sup> C NMR (125 MHz, DMSO- <i>d</i> <sub>6</sub> )            | S28 |
| UV/vis spectrum (CH <sub>3</sub> CN)                                   | S29 |
| HRESI-FT-MS (Orbit-Trap-MS)                                            | S30 |
| Diisobutyryl chlorizidine A ( <b>4</b> )                               |     |
| <sup>1</sup> H NMR spectrum (500 MHz, DMSO- <i>d</i> <sub>6</sub> )    | S31 |
| <sup>13</sup> C NMR (125 MHz, DMSO- <i>d</i> <sub>6</sub> )            | S32 |
| UV/vis spectrum (CH <sub>3</sub> CN)                                   | S33 |
| HRESI-FT-MS (Orbit-Trap-MS)                                            | S34 |
| Dipivaloyl chlorizidine A ( <b>5</b> )                                 |     |
| <sup>1</sup> H NMR spectrum (500 MHz, DMSO- <i>d</i> <sub>6</sub> )    | S35 |
| <sup>13</sup> C NMR (125 MHz, DMSO- <i>d</i> <sub>6</sub> )            | S36 |
| UV/vis spectrum (CH <sub>3</sub> CN)                                   | S37 |
| HRESI-FT-MS (Orbit-Trap-MS)                                            | S38 |
| Dibenzoyl chlorizidine A ( <b>6</b> )                                  |     |
| <sup>1</sup> H NMR spectrum (500 MHz, benzene- <i>d</i> <sub>6</sub> ) | S39 |
| <sup>13</sup> C NMR (125 MHz benzene- <i>d</i> <sub>6</sub> )          | S40 |
| UV/vis spectrum (CH <sub>3</sub> CN)                                   | S41 |
| HRESI-FT-MS (Orbit-Trap-MS)                                            | S42 |
| Chlorizidine B ( <b>7</b> )                                            |     |
| <sup>1</sup> H NMR spectrum (500 MHz, CD <sub>3</sub> CN)              | S43 |
| HRESI-FT-MS (Orbit-Trap-MS)                                            | S44 |
| Diacetyl chlorizidine B ( <b>8</b> )                                   |     |
| <sup>1</sup> H NMR spectrum (500 MHz, DMSO- <i>d</i> <sub>6</sub> )    | S45 |
| <sup>13</sup> C NMR (125 MHz, DMSO- <i>d</i> <sub>6</sub> )            | S46 |
| COSY spectrum (500 MHz, DMSO- <i>d</i> <sub>6</sub> )                  | S47 |
| HSQC spectrum (500 MHz, DMSO- <i>d</i> <sub>6</sub> )                  | S48 |
| HMBC spectrum (500 MHz, DMSO- <i>d</i> <sub>6</sub> )                  | S49 |
| UV/vis spectrum (CH <sub>3</sub> CN)                                   | S50 |
| HRESI-FT-MS (Orbit-Trap-MS)                                            | S51 |
| Thioester <b>9</b>                                                     |     |
| <sup>1</sup> H NMR spectrum (600 MHz, CD <sub>3</sub> CN)              | S52 |
| COSY spectrum (600 MHz, CD <sub>3</sub> CN)                            | S53 |
| HSQC spectrum (600 MHz, CD <sub>3</sub> CN)                            | S54 |
| HMBC spectrum (600 MHz, CD <sub>3</sub> CN)                            | S55 |
| UV/vis spectrum (CH <sub>3</sub> CN/water)                             | S56 |
| HRESI-TOF-MS                                                           | S57 |

|                                                                                    |     |
|------------------------------------------------------------------------------------|-----|
| <b>Amide 10</b>                                                                    |     |
| <sup>1</sup> H NMR spectrum (600 MHz, CD <sub>3</sub> CN)                          | S58 |
| COSY spectrum (600 MHz, CD <sub>3</sub> CN)                                        | S59 |
| HSQC spectrum (600 MHz, CD <sub>3</sub> CN)                                        | S60 |
| HMBC spectrum (600 MHz, CD <sub>3</sub> CN)                                        | S61 |
| UV/vis spectrum (CH <sub>3</sub> CN/water)                                         | S62 |
| HRESI-TOF-MS                                                                       | S63 |
| <b>Diacetylated thioester 12</b>                                                   |     |
| <sup>1</sup> H NMR spectrum (600 MHz, CD <sub>3</sub> CN)                          | S64 |
| UV/vis spectrum (CH <sub>3</sub> CN/water)                                         | S65 |
| HRESI-TOF-MS                                                                       | S66 |
| <b>Triacetylated amide 13</b>                                                      |     |
| <sup>1</sup> H NMR spectrum (600 MHz, CD <sub>3</sub> CN)                          | S67 |
| UV/vis spectrum (CH <sub>3</sub> CN/water)                                         | S68 |
| HRESI-TOF-MS                                                                       | S69 |
| <b>Triacetylated ester 14</b>                                                      |     |
| <sup>1</sup> H NMR spectrum (600 MHz, CD <sub>3</sub> CN)                          | S70 |
| UV/vis spectrum (CH <sub>3</sub> CN/water)                                         | S71 |
| HRESI-TOF-MS                                                                       | S72 |
| <b>Figure S3.</b> LC/(-)-LRESI-MS chromatogram of chlorizidine (1) in pH 10 buffer | S73 |
| <b>Figure S4.</b> X-Ray structure of chlorizidine A (1)                            | S74 |
| <b>Figure S5.</b> X-Ray structure of diacetyl chlorizidine A (2)                   | S75 |
| <b>Figure S6.</b> NCI 60 cell line drug screen                                     | S76 |

**General.** Pyridine was distilled from calcium hydride prior to use, and dimethylformamide (DMF) was dried prior to use by eluting through a column of activated alumina. All other reagents and solvents were purchased commercially and were used without further purification. Organic extracts were dried with sodium sulfate. Reactions were analyzed by TLC (Merck® silica gel 60 F<sub>254</sub>) or, when appropriate, an analytical 1090 Series HP system (0.7 mL min<sup>-1</sup>) with UV detection (254 nm) using a C18(2) Phenomenex® Luna column (5 µm, 100 x 4.6 mm). Semi-preparative RP-HPLC purification was performed on a C8(2) Phenomenex® Luna (5 µm, 250 x 10 mm), C18(2) Phenomenex® Luna (5 µm, 250 x 10 mm) or Kromasil® Diol (5 µm, 250 x 10 mm) column with UV detection (254 nm). <sup>1</sup>H NMR spectra were recorded at 500 MHz or 600 MHz in DMSO-*d*<sub>6</sub> (residual solvent referenced to 2.50 ppm), CD<sub>3</sub>CN (residual solvent referenced to 1.94 ppm), or benzene-*d*<sub>6</sub> (residual solvent referenced to 7.16 ppm) on a Varian Inova 500 MHz or Bruker 600 MHz NMR spectrometer. <sup>13</sup>C NMR spectra were recorded at 125 MHz in DMSO-*d*<sub>6</sub> (referenced to 39.5 ppm), CD<sub>3</sub>CN (referenced to 1.2 ppm) or benzene-*d*<sub>6</sub> (referenced to 128.0 ppm) on a Varian Inova 500 MHz NMR spectrometer.

**Phylogeny of strain CNH-287.** The identity of strain CNH-287 was determined by phylogenetic analysis of the 16S rRNA gene sequence. The sequence from this strain was used as a query in a BLASTn search at the NCBI database. The top hits were all members of the *Streptomyces* genus. Twenty-two of the top BLAST hits were from strains that shared 99% or greater identity with the CNH-287 sequence. Of these twenty-two strains, all that had a specified location were cultured from the marine environment, suggesting that strain CNH-287 may be part of a previously undescribed marine *Streptomyces* lineage.

A phylogeny of strain CNH-287 was built using the top five BLAST hits for this strain and a number of diverse *Streptomyces* sequences, including two from described marine *Streptomyces* lineages. Two outgroups were used that fell into the genus *Pseudonocardia*, members of the Pseudonocardiaceae which clade closely with streptomycetes in overall actinobacterial phylogenies.<sup>1</sup> Sequences were aligned using MUSCLE,<sup>2</sup> and a maximum likelihood phylogeny built using raxmlGUI.<sup>3</sup> GTR+G was used as a substitution model with 100 thorough bootstraps.

---

(1) Stackebrandt, E.; Rainey, F. A.; Ward-Rainey, N. L. *Int. J. Syst. Bacteriol.* **1997**, *47*, 479-491.

(2) Edgar, R. C. *Nucleic Acids Res.* **2004**, *32*, 1792-1797.

(3) Silvestro, D.; Michalak, I. *Org. Divers. Evol.* **2011**.

**Figure S1.** Phylogenetic tree for CNH-287.

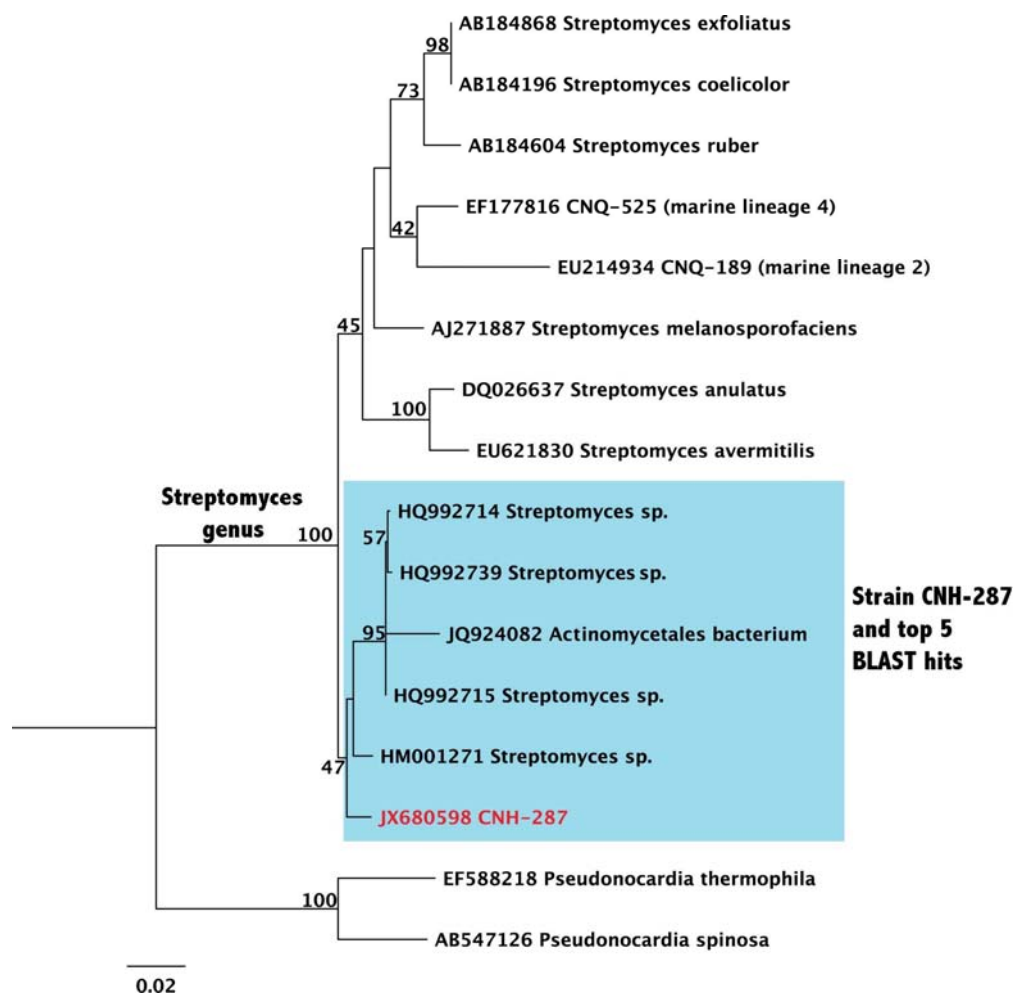

**Cultivation of strain CNH-287.** The strain was cultured in 2.8 L Fernbach flasks (20 x 1 L) in a seawater-based medium (per 1 L seawater: 10 g of starch, 4 g of yeast extract, 2 g of peptone, 1 g of CaCO<sub>3</sub>, 40 mg of Fe<sub>2</sub>(SO<sub>4</sub>)<sub>3</sub>•4H<sub>2</sub>O, 100 of mg KBr) and shaken at 230 rpm at 27 °C.

**Isolation and purification of chlorizidines A (1) and B (7).** After one day of a 20 L cultivation, sterilized Amberlite XAD-18 resin (20 g L<sup>-1</sup>) was added. The culture and resin were shaken for six days. The resin was filtered through cheesecloth, washed with deionized water, and eluted with acetone. The acetone was removed under reduced pressure, and the resulting aqueous layer was extracted with EtOAc (3 x 400 mL). The combined extracts were concentrated to yield 1.7 g of crude extract. The extract was fractionated by column chromatography on silica gel (20 g), eluting with a step gradient of isooctane, EtOAc, and CH<sub>3</sub>OH. The 1:1 isooctane/EtOAc fraction contained chlorizidine A (1). This sample was

further fractionated on C18 column (3 g) under vacuum, eluting with a step gradient of CH<sub>3</sub>CN and water. Fractions 4:1 and 9:1 CH<sub>3</sub>CN/water were purified by reversed-phase HPLC (80% CH<sub>3</sub>CN in water,  $t_R$  = 16 min, C18(2) Phenomenex® Luna, 2.5 mL min<sup>-1</sup>) to afford chlorizidine A (**1**) (50.0 mg) as a yellow film. In a separate 20 L culture, resin was instead added at the end of the cultivation (day seven). The crude extract (2.0 g) was fractionated by column chromatography on silica gel (20 g), again eluting with a step gradient of isooctane, EtOAc, and CH<sub>3</sub>OH. The 3:2 isooctane/EtOAc fraction contained chlorizidine A (**1**) and chlorizidine B (**7**). Chlorizidine A (**1**) was purified as before to yield 10.0 mg. Chlorizidine B (**7**) was purified by reversed-phase HPLC (70% CH<sub>3</sub>CN in water,  $t_R$  = 16.5 min, C18(2) Phenomenex® Luna, 2.5 mL min<sup>-1</sup>) to give 16.0 mg as a rapidly decomposing white solid.

**Chlorizidine A (1):** UV/vis (CH<sub>3</sub>CN)  $\lambda_{\max}$  = 212 (31800), 261 (47400), 340 (7300), 356 (8500), 409 (2300);  $[\alpha]_D$  -35 (*c* 0.50, CH<sub>3</sub>CN); IR (film)  $\tilde{\nu}$  = 3119, 1721, 1626 cm<sup>-1</sup>; <sup>1</sup>H NMR see Table 1; <sup>13</sup>C NMR (CD<sub>3</sub>CN)  $\delta$  163.9, 163.0, 157.5, 136.8, 135.5, 132.7, 116.9, 113.3, 113.0, 109.7, 108.2, 106.0, 105.9, 101.9, 99.3, 53.0, 32.5, 25.4; HRESI-FT-MS (Orbit-Trap-MS):  $m/z$  (M+H)<sup>+</sup> calcd for C<sub>18</sub>H<sub>11</sub><sup>35</sup>Cl<sub>4</sub>N<sub>2</sub>O<sub>3</sub> 442.9524, found 442.9511.

**Chlorizidine B (7):** UV/vis (CH<sub>3</sub>CN)  $\lambda_{\max}$  = 299; <sup>1</sup>H NMR see Table S1; HRESI-FT-MS (Orbit-Trap-MS):  $m/z$  (M+H)<sup>+</sup> calcd for C<sub>17</sub>H<sub>13</sub><sup>35</sup>Cl<sub>4</sub>N<sub>2</sub>O<sub>2</sub> 416.9731, found 416.9724.

**Diacetyl chlorizidine (2):** To a solution of chlorizidine A (**1**) (9.0 mg, 0.020 mmol) in dry CH<sub>3</sub>CN (2.0 mL) at room temperature was added dry Et<sub>3</sub>N (85  $\mu$ L, 0.61 mmol) followed by acetic anhydride (30  $\mu$ L, 0.30 mmol). The mixture was stirred at rt for 3 h, then diluted with water (10 mL) and extracted with EtOAc (3 x 5 mL). The combined extracts were dried, filtered, and concentrated. The crude material was filtered on a short plug of silica gel with EtOAc. The organic layer was concentrated, and the product was purified by reversed-phase HPLC (85% CH<sub>3</sub>CN in water,  $t_R$  = 11 min, C18(2) Phenomenex® Luna, 2.5 mL min<sup>-1</sup>) to yield 5.7 mg (54%) of **2** as a yellow film: UV/vis (CH<sub>3</sub>CN)  $\lambda_{\max}$  = 205 (26000), 267 (38400), 303 (2200), 316 (2200), 330 (1400), 414 (1600);  $[\alpha]_D$  -140 (*c* 0.10, CH<sub>3</sub>CN); IR (film)  $\tilde{\nu}$  = 3449, 1767, 1628 cm<sup>-1</sup>; <sup>1</sup>H NMR see Table S2; <sup>13</sup>C NMR (CD<sub>3</sub>CN)  $\delta$  168.7, 168.0, 167.2, 165.7, 157.9, 155.3, 154.9, 148.1, 147.5, 135.5, 134.9, 131.4, 125.8, 125.2, 117.7, 117.3, 114.6, 113.5, 113.0, 109.3, 109.2, 106.2, 100.1, 100.0, 53.0, 33.8, 33.6, 24.9, 24.8, 20.7, 20.3, 20.0, 19.6; HRESI-FT-MS (Orbit-Trap-MS):  $m/z$  (M+Na)<sup>+</sup> calcd for C<sub>22</sub>H<sub>14</sub><sup>35</sup>Cl<sub>4</sub>N<sub>2</sub>O<sub>5</sub>Na 548.9555, found 548.9556.

**Dimethyl chlorizidine (3):** To a solution of chlorizidine A (**1**) (8.0 mg, 0.018 mmol) in dry acetone (3.0 mL) at room temperature was added potassium carbonate (50 mg, 0.36 mmol) followed by dimethyl sulfate (21  $\mu$ L, 0.18 mmol). The mixture was stirred at rt overnight, then diluted with water (10 mL) and extracted with EtOAc (3 x 5 mL). The combined extracts were dried, filtered, and concentrated. The

crude material was filtered through a short plug of silica gel with EtOAc. The organic layer was concentrated, and the product was purified by reversed-phase HPLC (95% CH<sub>3</sub>CN in water,  $t_R$  = 14 min, C18(2) Phenomenex® Luna, 2.5 mL min<sup>-1</sup>) to give 7.5 mg (87%) of **3** as a yellow film: UV/vis (CH<sub>3</sub>CN)  $\lambda_{max}$  = 214 (32700), 267 (56900), 330 (4900), 343 (5200), 408 (2100); [ $\alpha$ ]<sub>D</sub> -77 (*c* 0.10, CH<sub>3</sub>CN); IR (film)  $\tilde{\nu}$  = 3421, 2945, 2854, 1750, 1615, 1581 cm<sup>-1</sup>; <sup>1</sup>H NMR see Table S2; <sup>13</sup>C NMR (DMSO-*d*<sub>6</sub>)  $\delta$  165.2, 164.1, 159.8, 158.7, 158.5, 137.5, 136.1, 132.1, 120.0, 116.2, 112.6, 107.4, 105.0, 100.9, 100.1, 99.2, 62.8, 61.8, 57.1, 52.7, 33.0, 25.2; HRESI-FT-MS (Orbit-Trap-MS)  $m/z$  (M+H)<sup>+</sup> calcd for C<sub>20</sub>H<sub>15</sub><sup>35</sup>Cl<sub>4</sub>N<sub>2</sub>O<sub>3</sub> 470.9837, found 470.9833.

**Diisobutryl chlorizidine (4):** To a solution of chlorizidine A (**1**) (4.5 mg, 0.010 mmol) in dry CH<sub>3</sub>CN (1.5 mL) at room temperature was added dry Et<sub>3</sub>N (27  $\mu$ L, 0.20 mmol) followed by isobutryl chloride (10  $\mu$ L, 0.10 mmol). The mixture was stirred at rt for 3 h, then diluted with water (10 mL) and extracted with EtOAc (3 x 5 mL). The combined extracts were dried, filtered, and concentrated. The crude material was filtered on a short plug of silica gel with EtOAc. The organic layer was concentrated, and the product was purified by reversed-phase HPLC (95% CH<sub>3</sub>CN in water,  $t_R$  = 12 min, C18(2) Phenomenex® Luna, 2.5 mL min<sup>-1</sup>) to give 4.2 mg (72%) of **4** as a yellow film: UV/vis (CH<sub>3</sub>CN)  $\lambda_{max}$  = 205 (34000), 267 (53500), 303 (3700), 316 (3700), 330 (3300), 414 (2300); [ $\alpha$ ]<sub>D</sub> -100 (*c* 0.10, CH<sub>3</sub>CN); IR (film)  $\tilde{\nu}$  = 2979, 2938, 1627 cm<sup>-1</sup>; <sup>1</sup>H NMR Table S2; <sup>13</sup>C NMR (DMSO-*d*<sub>6</sub>)  $\delta$  174.3, 174.2, 173.7, 173.2, 171.5, 157.9, 157.8, 155.7, 155.1, 155.0, 148.6, 148.3, 147.6, 135.4, 135.1, 135.0, 134.9, 131.5, 131.4, 131.3, 125.4, 125.2, 125.0, 119.0, 118.4, 117.7, 117.2, 114.4, 113.6, 113.5, 113.4, 113.2, 112.9, 109.5, 109.3, 109.2, 109.0, 106.5, 106.4, 100.3, 100.2, 100.1, 54.4, 53.5, 53.3, 33.8, 33.7, 33.4, 33.3, 33.2, 32.9, 32.7, 24.9, 24.8, 24.4, 19.0, 18.6, 18.5, 18.3, 17.8, 17.7, 17.5; HRESI-FT-MS (Orbit-Trap-MS)  $m/z$  (M+Na)<sup>+</sup> calcd for C<sub>26</sub>H<sub>22</sub><sup>35</sup>Cl<sub>4</sub>N<sub>2</sub>O<sub>5</sub>Na 605.0181, found 605.0174.

**Dipivaloyl chlorizidine (5):** To a solution of chlorizidine A (**1**) (4.5 mg, 0.010 mmol) in dry CH<sub>3</sub>CN (1.5 mL) at room temperature was added dry Et<sub>3</sub>N (27  $\mu$ L, 0.20 mmol) followed by pivaloyl chloride (12  $\mu$ L, 0.10 mmol). The mixture was stirred at rt for 3 h, then diluted with water (10 mL) and extracted with EtOAc (3 x 5 mL). The combined extracts were dried, filtered, and concentrated. The crude material was filtered on a short plug of silica gel with EtOAc. The organic layer was concentrated, and the product was purified by reversed-phase HPLC (97% CH<sub>3</sub>CN in water,  $t_R$  = 13 min, C18(2) Phenomenex® Luna, 2.5 mL min<sup>-1</sup>) to give 4.7 mg (77%) of **5** as a yellow film: UV/vis (CH<sub>3</sub>CN)  $\lambda_{max}$  = 205 (36000), 267 (56700), 303 (4300), 316 (4300), 330 (2400), 414 (2400); [ $\alpha$ ]<sub>D</sub> -57 (*c* 0.10, CH<sub>3</sub>CN); IR (film)  $\tilde{\nu}$  = 3401, 2976, 1761, 1627 cm<sup>-1</sup>; <sup>1</sup>H NMR Table S2; <sup>13</sup>C NMR (DMSO-*d*<sub>6</sub>)  $\delta$  175.7, 175.4, 173.6, 158.0, 157.9, 156.4, 155.7, 155.4, 149.3, 149.0, 147.9, 135.4, 135.3, 135.2, 134.8, 131.4, 131.3, 124.2, 124.1, 118.7,

118.1, 117.8, 117.3, 117.2, 114.1 113.7, 113.6, 113.5, 113.2, 113.0, 109.7, 109.6, 109.3, 109.2, 109.1, 107.1, 106.7, 106.6, 100.6, 100.5, 55.0, 54.3, 53.8, 26.8, 26.7, 26.5, 26.4, 26.3, 24.6; HRESI-FT-MS (Orbit-Trap-MS)  $m/z$  (M+Na)<sup>+</sup> calcd for C<sub>28</sub>H<sub>26</sub><sup>35</sup>Cl<sub>4</sub>N<sub>2</sub>O<sub>5</sub>Na 633.0494, found 633.0487.

**Dibenzoyl chlorizidine (6):** To a solution of chlorizidine A (**1**) (8.0 mg, 0.018 mmol) in dry CH<sub>3</sub>CN (3 mL) at room temperature was added dry Et<sub>3</sub>N (50  $\mu$ L, 0.36 mmol) followed by benzoyl chloride (21  $\mu$ L, 0.18 mmol). The mixture was stirred at rt for 3 h, then diluted with water (10 mL) and extracted with EtOAc (3 x 5 mL). The combined extracts were dried, filtered, and concentrated. The crude material was filtered on a short plug of silica gel with EtOAc. The organic layer was concentrated, and the product was purified by reversed-phase HPLC (90% CH<sub>3</sub>CN in water,  $t_R$  = 14 min, C18(2) Phenomenex® Luna, 2.5 mL min<sup>-1</sup>) to give 5.0 mg (42%) of **6** as a yellow film: UV/vis (CH<sub>3</sub>CN)  $\lambda_{max}$  = 233 (50000), 267 (63700), 303 (4200), 316 (3900), 330 (2300), 414 (2300); [ $\alpha$ ]<sub>D</sub> -74 (*c* 0.050, CH<sub>3</sub>CN); IR (film)  $\tilde{\nu}$  = 3485, 3058, 2963, 1754, 1629 cm<sup>-1</sup>; <sup>1</sup>H NMR Table S2; <sup>13</sup>C NMR (benzene-*d*<sub>6</sub>)  $\delta$  164.4, 164.1, 163.9, 163.4, 162.1, 157.9, 157.7, 157.5, 155.9, 155.1, 155.0, 149.9, 149.5, 148.8, 136.0, 135.9, 135.0, 134.7, 134.6, 134.4, 134.3, 134.2, 133.5, 131.3, 131.2, 131.1, 131.0, 130.9, 130.7, 130.6, 130.5, 130.4, 129.3, 129.2, 129.0, 128.8, 128.7, 128.6, 128.5, 128.4, 128.2, 128.1, 128.0, 127.1, 126.6, 125.9, 120.6, 119.9, 118.9, 118.2, 118.1, 114.8, 114.1, 112.1, 112.0, 111.8, 111.7, 108.3, 108.2, 108.1, 107.7, 107.5, 101.2, 54.6, 54.1, 53.8, 34.4, 34.0, 33.8, 25.1, 24.7; HRESI-FT-MS (Orbit-Trap-MS)  $m/z$  (M+H)<sup>+</sup> calcd for C<sub>32</sub>H<sub>19</sub><sup>35</sup>Cl<sub>4</sub>N<sub>2</sub>O<sub>5</sub> 651.0048, found 651.0033.

**Diacetyl chlorizidine B (8):** To a solution of chlorizidine B (**7**) (16 mg, 0.039 mmol) in dry CH<sub>3</sub>CN (5.0 mL) at room temperature was added dry Et<sub>3</sub>N (85  $\mu$ L, 0.78 mmol) followed by acetic anhydride (36  $\mu$ L, 0.39 mmol). The mixture was stirred at rt for 3 h, then diluted with water (10 mL) and extracted with EtOAc (3 x 5 mL). The combined extracts were dried, filtered, and concentrated. The crude material was filtered on a short plug of silica gel with EtOAc. The organic layer was concentrated, and the product was first purified by reversed-phase HPLC (80% CH<sub>3</sub>CN in water,  $t_R$  = 12 min, C18(2) Phenomenex® Luna, 2.5 mL min<sup>-1</sup>) and then purified by normal phase HPLC (85% isooctane in isopropanol,  $t_R$  = 15 min, Kromasil® 60-5-Diol, 2.5 mL min<sup>-1</sup>) to furnish 6.0 mg (31%) of **8**: UV/vis (CH<sub>3</sub>CN)  $\lambda_{max}$  = 300 (23500); [ $\alpha$ ]<sub>D</sub> -75 (*c* 0.10, CH<sub>3</sub>CN); IR (film)  $\tilde{\nu}$  3131, 2989, 1767, 1625 cm<sup>-1</sup>; <sup>1</sup>H NMR Table S1; <sup>13</sup>C NMR (DMSO-*d*<sub>6</sub>)  $\delta$  169.3, 167.7, 149.5, 149.4, 135.3, 131.8, 128.2, 122.7, 116.9, 114.9, 113.0, 109.1, 109.0, 107.3, 106.4, 99.9, 53.9, 33.8, 24.7, 20.6, 20.0; HRESI-FT-MS (Orbit-Trap-MS):  $m/z$  (M+H)<sup>+</sup> calcd for C<sub>21</sub>H<sub>17</sub><sup>35</sup>Cl<sub>4</sub>N<sub>2</sub>O<sub>4</sub> 500.9942, found 500.9935.



**Thioester 9:** To a solution of chlorizidine A (**1**) (15.4 mg, 0.0347 mmol) and potassium carbonate (40 mg, 0.29 mmol) in dry DMF (2.0 mL) at room temperature was added *N*-acetylcysteamine (20  $\mu$ L, 0.19 mmol) via syringe. The mixture was stirred at 60 °C for 1 h, then diluted with water (5 mL) and a saturated aq. NH<sub>4</sub>Cl solution (5 mL) and extracted with EtOAc (3 x 5 mL). The combined extracts were washed with brine (4 mL), dried, filtered, and concentrated. The product was purified by reversed-phase HPLC (55% CH<sub>3</sub>CN in water, 0.2% TFA,  $t_R$  = 27 min, C8(2) Phenomenex® Luna, 3 mL min<sup>-1</sup>) to give 10.2 mg (52%) of **9**: UV/vis (CH<sub>3</sub>CN/water)  $\lambda_{max}$  = 223, 266, 360, 417;  $[\alpha]_D$  -19 (*c* 0.38, CH<sub>3</sub>CN); IR (film)  $\tilde{\nu}$  = 3352, 1728, 1626 cm<sup>-1</sup>; <sup>1</sup>H and 2D NMR Table S3; HRMS (ESI-TOF) *m/z* (M+H)<sup>+</sup> calcd for C<sub>22</sub>H<sub>20</sub><sup>35</sup>Cl<sub>4</sub>N<sub>3</sub>O<sub>4</sub>S 561.9929, found 561.9925.

**Amide 10:** To a solution of chlorizidine A (**1**) (5.3 mg, 0.012 mmol) in dry CH<sub>3</sub>CN (2.0 mL) at room temperature was added benzylamine (30  $\mu$ L, 0.27 mmol) via syringe. The mixture was stirred at rt for 3 h and then concentrated. The product was purified by reversed-phase HPLC (70% CH<sub>3</sub>CN in water, 0.2% TFA,  $t_R$  = 20 min, C8(2) Phenomenex® Luna, 3 mL min<sup>-1</sup>), collecting the eluent in a vial containing an aq. 0.2 M NaHCO<sub>3</sub> solution. After concentration, the white solid was triturated with CH<sub>3</sub>CN. The solution concentrated onto C18 silica (100 mg) and fractionated on a C18 SPE cartridge (100 mg), eluting with water and then with CH<sub>3</sub>CN. The organic fraction was concentrated to give 2.2 mg (33%) of **10**: UV/vis (CH<sub>3</sub>CN/water)  $\lambda_{max}$  = 239, 307;  $[\alpha]_D$  +2 (*c* 0.34, CH<sub>3</sub>CN); IR (film)  $\tilde{\nu}$  = 3237, 1613 cm<sup>-1</sup>; <sup>1</sup>H and 2D NMR Table S4; HRMS (ESI-TOF) *m/z* (M+H)<sup>+</sup> calcd for C<sub>25</sub>H<sub>20</sub><sup>35</sup>Cl<sub>4</sub>N<sub>3</sub>O<sub>3</sub> 550.0259, found 550.0264.

**Ester 11:** To chlorizidine A (**1**) (1.3 mg, 0.0029 mmol) and K<sub>2</sub>CO<sub>3</sub> (10 mg) was added dry MeOH (1.0 mL) at room temperature. The solution was stirred at rt overnight, then diluted with a saturated aq. NH<sub>4</sub>Cl solution (4 mL) and extracted with EtOAc (2 x 2 mL). The combined extracts were washed with brine (1 mL), dried, filtered, and concentrated. The product was purified by reversed-phase HPLC (65% CH<sub>3</sub>CN, 0.2% TFA,  $t_R$  = 30 min, C8(2) Phenomenex® Luna, 3 mL min<sup>-1</sup>) to give 0.4 mg (29%) of **11**: HRMS (ESI-TOF) *m/z* (M-H)<sup>-</sup> calcd for C<sub>19</sub>H<sub>13</sub><sup>35</sup>Cl<sub>4</sub>N<sub>2</sub>O<sub>4</sub> 472.9629, found 472.9646. The complete characterization of **11** was not possible due to its instability.

**Diacetylated thioester 12:** To a solution of thioester **9** (3.0 mg, 0.0053 mmol) in dry pyridine (1.0 mL) at room temperature was added acetic anhydride (0.10 mL). The mixture was stirred at rt for 4 h, CH<sub>3</sub>OH (1 mL) was added, and the solution was concentrated. The product was purified by reversed-phase HPLC (70% CH<sub>3</sub>CN, 0.2% TFA,  $t_R$  = 16 min, C8(2) Phenomenex® Luna, 3 mL min<sup>-1</sup>) to give 1.8 mg (52%) of **12**: UV/vis (CH<sub>3</sub>CN/water)  $\lambda_{max}$  = 219, 267, 321, 417;  $[\alpha]_D$  -4 (*c* 0.17, CH<sub>3</sub>CN); IR (film)  $\tilde{\nu}$  = 1761, 1684, 1626 cm<sup>-1</sup>; <sup>1</sup>H NMR (600 MHz, CD<sub>3</sub>CN)  $\delta$  10.02 (br s), 9.95 (br s), 7.12 (s), 7.09 (s), 6.46 (s), 5.86 (s),

5.83 (s), 4.04 (m), 3.35 (m), 3.08 (m), 2.58 (m), 2.42 (m), 2.36 (s), 2.32 (s), 2.29 (s), 2.22 (s), 1.87 (s), 1.85 (s); HRMS (ESI-TOF)  $m/z$  (M+H)<sup>+</sup> calcd for C<sub>26</sub>H<sub>24</sub><sup>35</sup>Cl<sub>4</sub>N<sub>3</sub>O<sub>6</sub>S 646.0140, found 646.0130.

**Triacetylated amide 13:** To a solution of chlorizidine A (**1**) (5.0 mg, 0.011 mmol) in dry CH<sub>3</sub>CN (2.0 mL) at room temperature was added benzylamine (30 μL, 0.27 mmol). The mixture was stirred at rt for 5 h and then concentrated. To a solution of the crude product in dry pyridine (1 mL) was added acetic anhydride (0.20 mL). The mixture was stirred at rt overnight, CH<sub>3</sub>OH (1 mL) was added, and the solution was concentrated. The product was purified by reversed-phase HPLC (70% CH<sub>3</sub>CN, 0.2% TFA,  $t_R$  = 24 min, C8(2) Phenomenex® Luna, 3 mL min<sup>-1</sup>) to give 3.4 mg (45%) of **13**: UV/vis (CH<sub>3</sub>CN/water)  $\lambda_{max}$  = 235, 282; [ $\alpha$ ]<sub>D</sub> -17 ( $c$  0.29, CH<sub>3</sub>CN); IR (film)  $\tilde{\nu}$  = 1773, 1684 cm<sup>-1</sup>; <sup>1</sup>H NMR (600 MHz, CD<sub>3</sub>CN)  $\delta$  7.34-7.22 (m), 7.14-7.03 (m), 7.08 (s), 6.32 (s), 6.30 (s), 5.88 (s), 5.85 (s), 5.64 (dd,  $J$  = 8.8, 5.5 Hz), 5.49 (dd,  $J$  = 8.8, 6.4 Hz), 4.39 (d,  $J$  = 5.8 Hz), 4.36 (d,  $J$  = 6.4 Hz), 4.33 (d,  $J$  = 5.8 Hz), 4.30 (d,  $J$  = 5.8 Hz), 4.26 (d,  $J$  = 6.2 Hz), 3.03 (m), 2.92 (m), 2.44 (m), 2.33 (s), 2.27 (s), 2.15 (s), 1.71 (s); HRMS (ESI-TOF)  $m/z$  (M+H)<sup>+</sup> calcd for C<sub>31</sub>H<sub>26</sub><sup>35</sup>Cl<sub>4</sub>N<sub>3</sub>O<sub>6</sub> 676.0576, found 676.0595.

**Triacetylated ester 14:** To a solution of diacetyl chlorizidine A (**2**) (7.9 mg, 0.015 mmol) in dry CH<sub>3</sub>OH (2.0 mL) at room temperature was added an aqueous solution of NaOH (0.10 mL, 0.05 M). The mixture was stirred at rt overnight, then diluted with a saturated aq. NH<sub>4</sub>Cl solution (4 mL) and extracted with EtOAc (3 x 2 mL). The combined extracts were washed with brine (2 x 1 mL), dried, filtered, and concentrated. To a solution of the crude product in dry pyridine (1 mL) was added acetic anhydride (0.20 mL). The mixture was stirred at rt overnight, CH<sub>3</sub>OH (1 mL) was added, and the solution was concentrated. The product was purified by reversed-phase HPLC (70% CH<sub>3</sub>CN, 0.2% TFA,  $t_R$  = 25 min, C8(2) Phenomenex® Luna, 3 mL min<sup>-1</sup>) to give 3.4 mg (38%) of **14**: UV/vis (CH<sub>3</sub>CN/water)  $\lambda_{max}$  = 238, 287; [ $\alpha$ ]<sub>D</sub> -21 ( $c$  0.28, CH<sub>3</sub>CN); IR (film)  $\tilde{\nu}$  = 1773, 1684 cm<sup>-1</sup>; <sup>1</sup>H NMR (600 MHz, CD<sub>3</sub>CN)  $\delta$  7.18 (s), 7.09 (s), 6.29 (s), 5.89 (s), 5.68 (dd,  $J$  = 9.4, 5.5 Hz), 5.57 (dd,  $J$  = 8.8, 5.8 Hz), 3.71 (s), 3.59 (s), 3.06 (m), 2.94 (m), 2.46 (m), 2.34 (s), 2.32 (s), 2.31 (s), 2.29 (s); HRMS (ESI-TOF)  $m/z$  (M+H)<sup>+</sup> calcd for C<sub>25</sub>H<sub>21</sub><sup>35</sup>Cl<sub>4</sub>N<sub>2</sub>O<sub>7</sub> 601.0103, found 601.0091.

**Figure S2.** HMBC correlations for chlorizidine A (**1**)

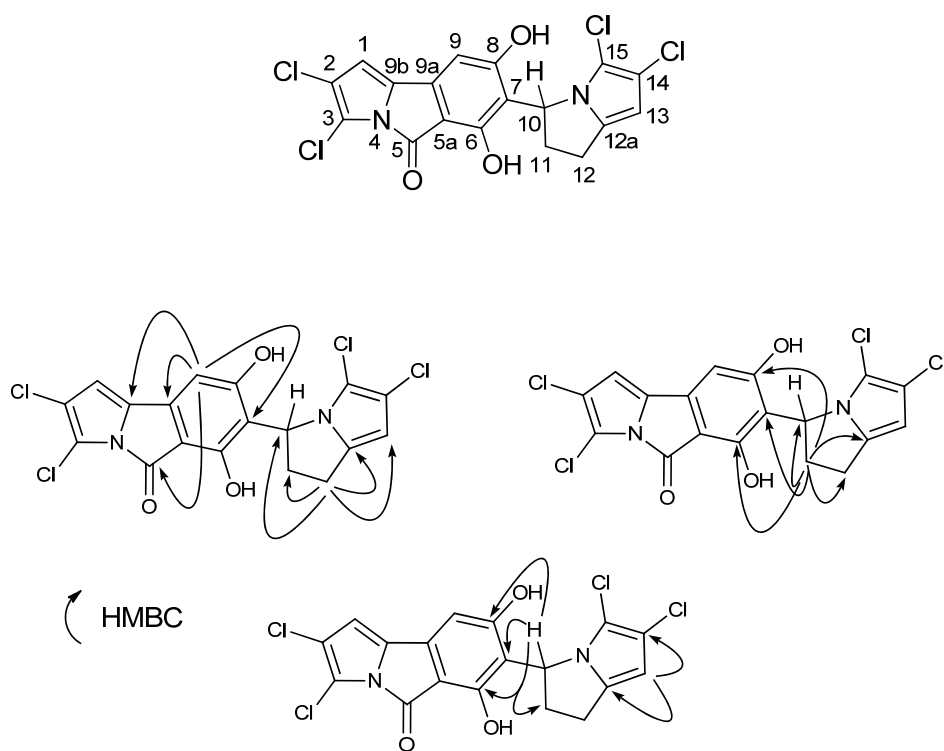

**Table S1.** Selected NMR spectral data for **7** and **8**

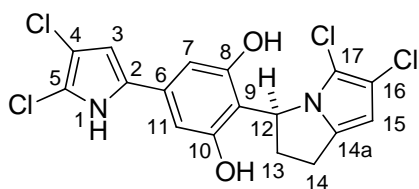

**7**

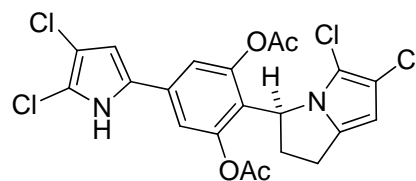

**8**

| position | $\delta_{\text{H}}$ ( <b>7</b> ), mult. ( <i>J</i> , Hz) <sup>[a]</sup><br>CD <sub>3</sub> CN | $\delta_{\text{H}}$ , ( <b>8</b> ), mult. ( <i>J</i> , Hz) <sup>[a]</sup><br>DMSO- <i>d</i> <sub>6</sub> |
|----------|-----------------------------------------------------------------------------------------------|----------------------------------------------------------------------------------------------------------|
| 1        | 10.06, br s                                                                                   | 12.42, br s                                                                                              |
| 3        | 6.45, d (3.0)                                                                                 | 6.79, d (3.0)                                                                                            |
| 7        | 6.51, br s <sup>[b]</sup>                                                                     | 7.35, s <sup>[b]</sup>                                                                                   |
| 11       | 6.51, br s <sup>[b]</sup>                                                                     | 7.40, s <sup>[b]</sup>                                                                                   |
| 12       | 5.84, dd (9.5, 6.5)                                                                           | 5.59, dd (6.5, 5.5)                                                                                      |
| 13       | 2.80, ddd (17.5, 14.0, 5.0)                                                                   | 2.84, ddd (18.5, 10.0, 4.5)                                                                              |
|          | 2.55, ddd (17.5, 10.0, 6.0)                                                                   | 2.25, dd (12.0, 6.0)                                                                                     |
| 14       | 3.06, ddd (14.5, 10.0, 5.0)                                                                   | 2.99, ddd (19.0, 14.5, 6.0)                                                                              |
|          | 2.88, ddd (14.5, 10.0, 6.0)                                                                   | 2.88, ddd (17.5, 9.5, 5.5)                                                                               |
| 15       | 5.79, s                                                                                       | 5.95, s                                                                                                  |
| Ac       |                                                                                               | 2.39, s                                                                                                  |
|          |                                                                                               | 1.94, s                                                                                                  |

<sup>[a]</sup> 500 MHz. <sup>[b]</sup> H-7 and H-11 are not distinguishable due to the pseudo-symmetry of **7** and **8**.

**Table S2.** Selected NMR spectral data for **2-6**

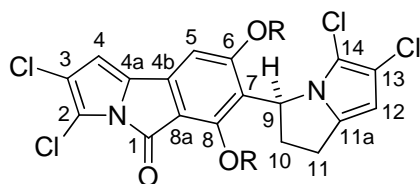

**2**, R = Ac  
**3**, R = Me  
**4**, R = CO*i*-Pr  
**5**, R = Piv  
**6**, R = Bz

| position | $\delta_{\text{H}}$ ( <b>2</b> )<br>mult. ( <i>J</i> , Hz) <sup>[a]</sup><br>DMSO- <i>d</i> <sub>6</sub> | $\delta_{\text{H}}$ ( <b>3</b> )<br>mult. ( <i>J</i> , Hz) <sup>[a]</sup><br>DMSO- <i>d</i> <sub>6</sub> | $\delta_{\text{H}}$ ( <b>4</b> )<br>mult. ( <i>J</i> , Hz) <sup>[a]</sup><br>DMSO- <i>d</i> <sub>6</sub>                  | $\delta_{\text{H}}$ ( <b>5</b> )<br>mult. ( <i>J</i> , Hz) <sup>[a]</sup><br>DMSO- <i>d</i> <sub>6</sub> | $\delta_{\text{H}}$ ( <b>6</b> )<br>mult. ( <i>J</i> , Hz) <sup>[a]</sup><br>benzene- <i>d</i> <sub>6</sub> |
|----------|----------------------------------------------------------------------------------------------------------|----------------------------------------------------------------------------------------------------------|---------------------------------------------------------------------------------------------------------------------------|----------------------------------------------------------------------------------------------------------|-------------------------------------------------------------------------------------------------------------|
| 1        | 6.80, s<br>6.79, s                                                                                       | 7.17, s<br>7.10, s                                                                                       | 6.80, s<br>6.78, s                                                                                                        | 6.80, s<br>6.79, s                                                                                       | 5.48, s<br>5.43, s<br>5.40, s                                                                               |
| 9        | 7.42, s<br>7.36, s                                                                                       | 6.67, s                                                                                                  | 7.45, s<br>7.42, s<br>7.33, s                                                                                             | 7.44, s<br>7.43, s<br>7.30, s                                                                            | 6.43, s<br>6.38, s<br>6.35, s                                                                               |
| 10       | 5.70, br s<br>5.75, dd (6.0, 5.0)                                                                        | 5.82, s                                                                                                  | 5.63, t (8.5)<br>5.61, t (8.5)<br>5.58, t (6.0)                                                                           | 5.48, br s<br>5.46, t (8.5)<br>5.40, t (8.5)                                                             | 5.17, dd (9.0, 5.0)<br>5.10, dd (9.5, 4.5)                                                                  |
| 11       | 2.88, m<br>2.36, br s<br>2.25, ddd (18.0,<br>14.0, 5.5)                                                  | 2.86, m<br>2.36, m                                                                                       | 2.81, m<br>2.40, m<br>2.29, ddd (17.5,<br>14.0, 5.5)<br>2.03, m                                                           | 2.75-2.57, m<br>2.30, br s<br>2.01, ddd (19.0,<br>10.0, 10.0)                                            | 2.36, m<br>2.30, m<br>2.11, m                                                                               |
| 12       | 3.10, t (10.0)<br>3.01, dd (15.0,<br>12.0)<br>2.91, m                                                    | 3.00, m<br>2.88, m                                                                                       | 2.97-2.76, m                                                                                                              | 2.94-2.77, m                                                                                             | 2.55, ddd (15.0,<br>5.0, 5.0)<br>2.27, m<br>2.11, m<br>2.02, dd (20.0,<br>10.0)                             |
| 13       | 5.96, s<br>5.94, s                                                                                       | 5.90, s<br>5.86, s                                                                                       | 5.98, s<br>5.95, s<br>5.92, s                                                                                             | 6.00, s<br>5.96, s<br>5.95, s                                                                            | 5.58, s<br>5.40, s<br>5.26, s                                                                               |
| R        | 2.43, s<br>2.41, s<br>2.00, s<br>1.95, s                                                                 | 4.04, s<br>4.00, s<br>3.68, s<br>3.48, s                                                                 | 3.03, 2.53, 2.44<br>2.40, sep (9.0)<br>1.33, 1.32, 1.29,<br>1.28, 1.24, 1.13,<br>1.12, 1.05, 1.05,<br>0.98, 0.95, d (9.0) | 1.39, s<br>1.36, s<br>1.35, s<br>1.11, s<br>1.10, s<br>1.08, s                                           | 8.34, br s<br>8.25, 8.20, 8.08,<br>8.06, 7.91, d (7.5)<br>7.21-7.04, m                                      |

<sup>[a]</sup> 500 MHz.

**Table S3.** Selected NMR spectral data for **9** (CD<sub>3</sub>CN)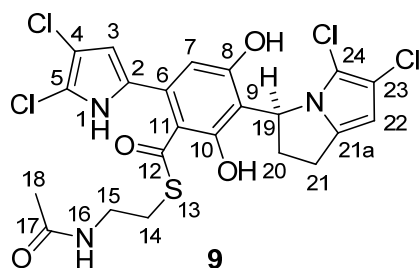

| position | $\delta_C$ <sup>[a]</sup> | $\delta_H$ , mult. (J, Hz) <sup>[b]</sup> | HMBC         |
|----------|---------------------------|-------------------------------------------|--------------|
| 1        |                           | 9.66, br s                                | 3            |
| 3        | 107.7                     | 6.24, s                                   |              |
| 7        | 102.7                     | 6.46, s                                   | 8,9,11,19    |
| 8        | 164.4                     |                                           |              |
| 9        | 114.9                     |                                           |              |
| 10       | 158.1                     |                                           |              |
| 11       | 106.0                     |                                           |              |
| 12       | --                        |                                           |              |
| 14       | 31.5                      | 2.55, m                                   | 15           |
| 15       | 39.9                      | 3.32, m                                   | 14,17        |
| 16       |                           | 6.84, br s                                |              |
| 17       | 171.8                     |                                           |              |
| 18       | 22.6                      | 1.87, s                                   | 17           |
| 19       | 38.6                      | 4.43, m                                   | 8,10,20,21   |
| 20       | 33.6                      | 2.28, m                                   | 9,19,21,21a  |
|          |                           | 2.17, m                                   |              |
| 21       | 26.5                      | 2.51, m                                   | 19,20,21a,22 |
| 21a      | 131.6                     |                                           |              |
| 22       | 106.4                     | 5.81, d (3.0)                             | 21,21a       |

<sup>[a]</sup> Carbon assignments were based solely on HSQC and HMBC data collected at 600 MHz. Carbons 2, 4, 5, 6, 12, 23, and 24 could not be assigned. <sup>[b]</sup> 600 MHz.

**Table S4.** Selected NMR spectral data for **10** (CD<sub>3</sub>CN)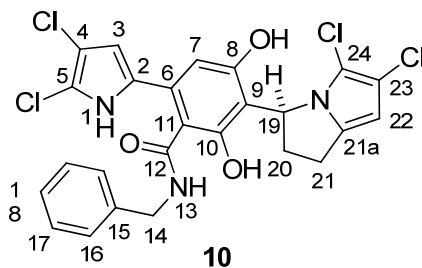

| position | $\delta_C$ [a] | $\delta_H$ , mult. (J, Hz) [b] | HMBC         |
|----------|----------------|--------------------------------|--------------|
| 1        |                | 10.03, br s                    |              |
| 3        | 110.0          | 6.21, s                        |              |
| 7        | 110.2          | 6.32, br s                     |              |
| 9        | 114.3          |                                |              |
| 11       | 106.2          |                                |              |
| 12       | 170.3          |                                |              |
| 13       |                | 6.46, br s                     |              |
| 14       | 44.1           | 4.34, br s                     | 12,15,16     |
| 15       | 138.3          |                                |              |
| 16       | 128.3          | 7.15, m                        | 14           |
| 17       | 129.1          | 7.32, m                        | 14,15        |
| 18       | 127.8          | 7.26, m                        | 15,16        |
| 19       | 53.9           | 5.89, br s                     |              |
| 20       | 32.8           | 2.81, m                        |              |
|          |                | 2.53, br s                     | 9,19,21,21a  |
| 21       | 26.0           | 3.07, br s                     |              |
|          |                | 2.87, m                        | 19,20,21a,22 |
| 21a      | 137.5          |                                |              |
| 22       | 99.5           | 5.77, s                        | 19,21,21a    |

[a] Carbon assignments were based solely on HSQC and HMBC data collected at 600 MHz. Carbons 2, 4, 5, 6, 8, 10, 23, and 24 could not be assigned. [b] 600 MHz.

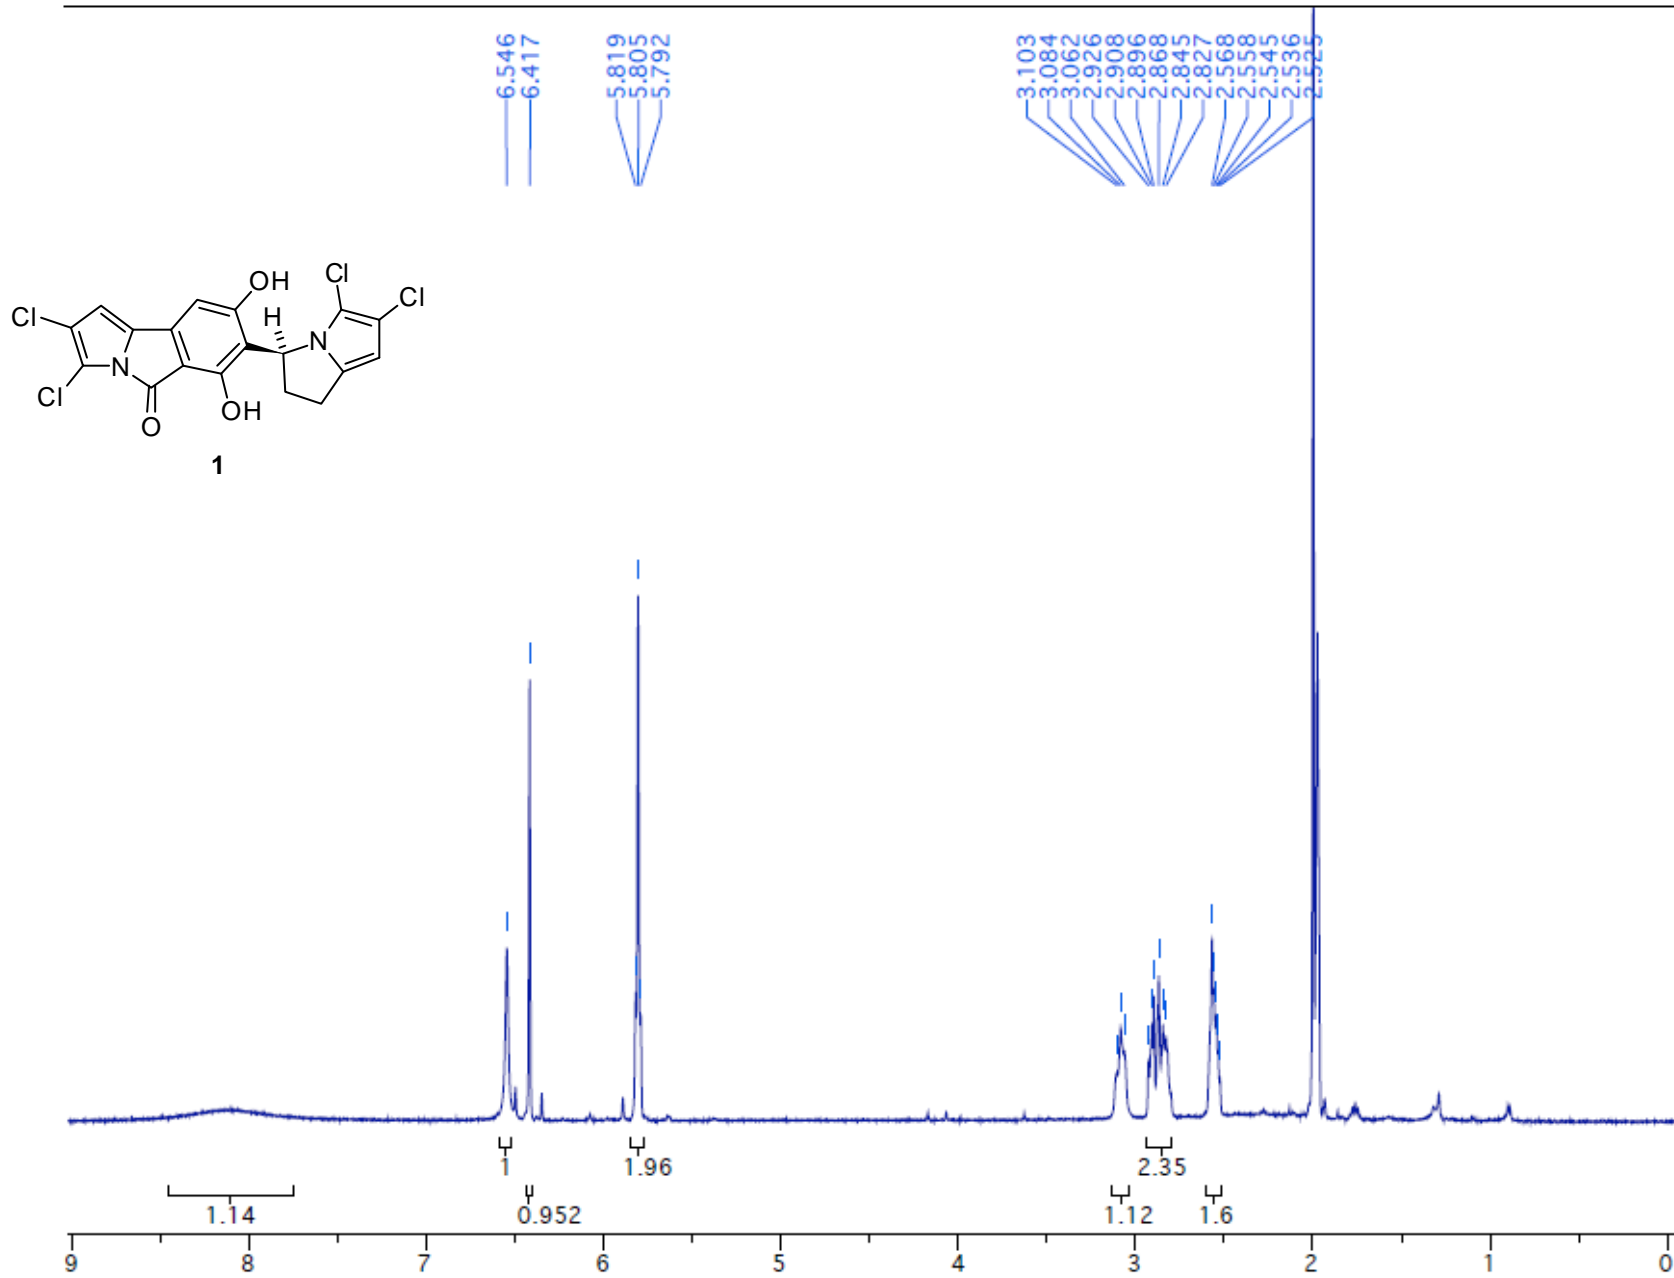



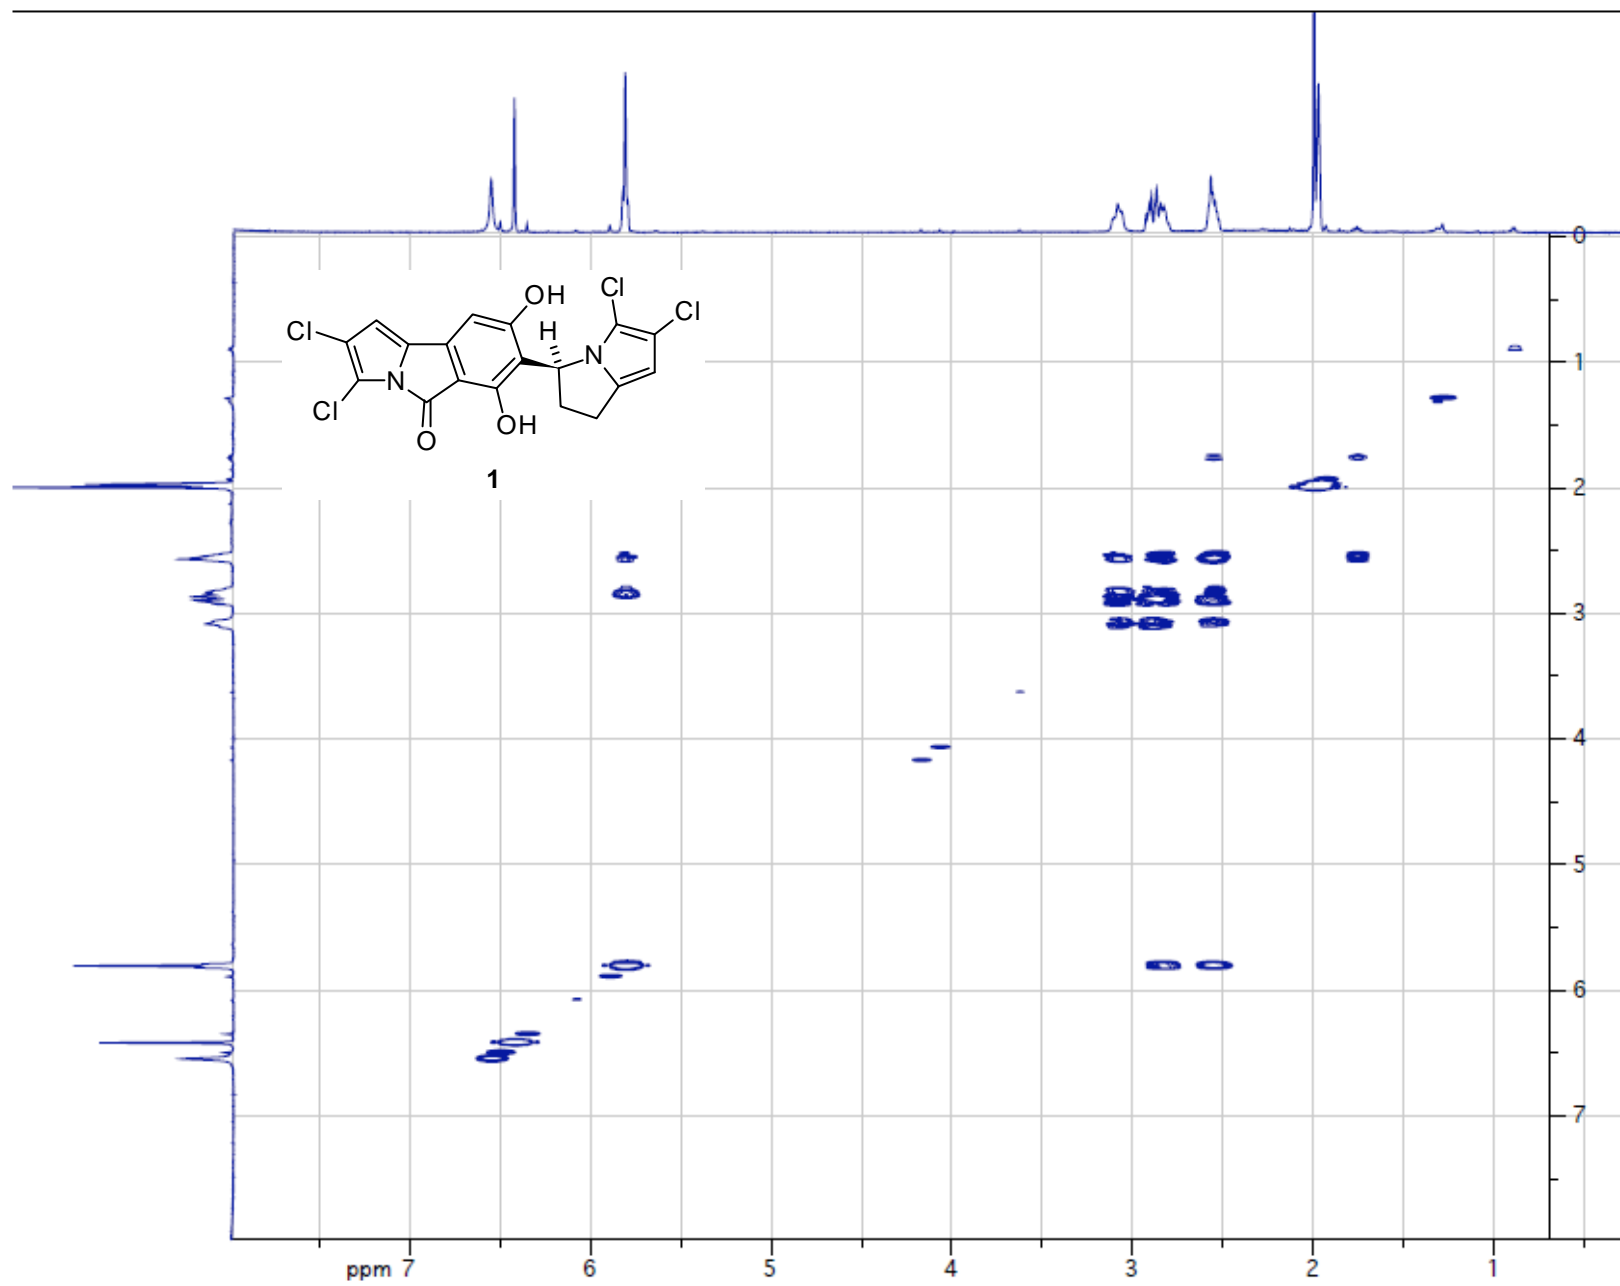

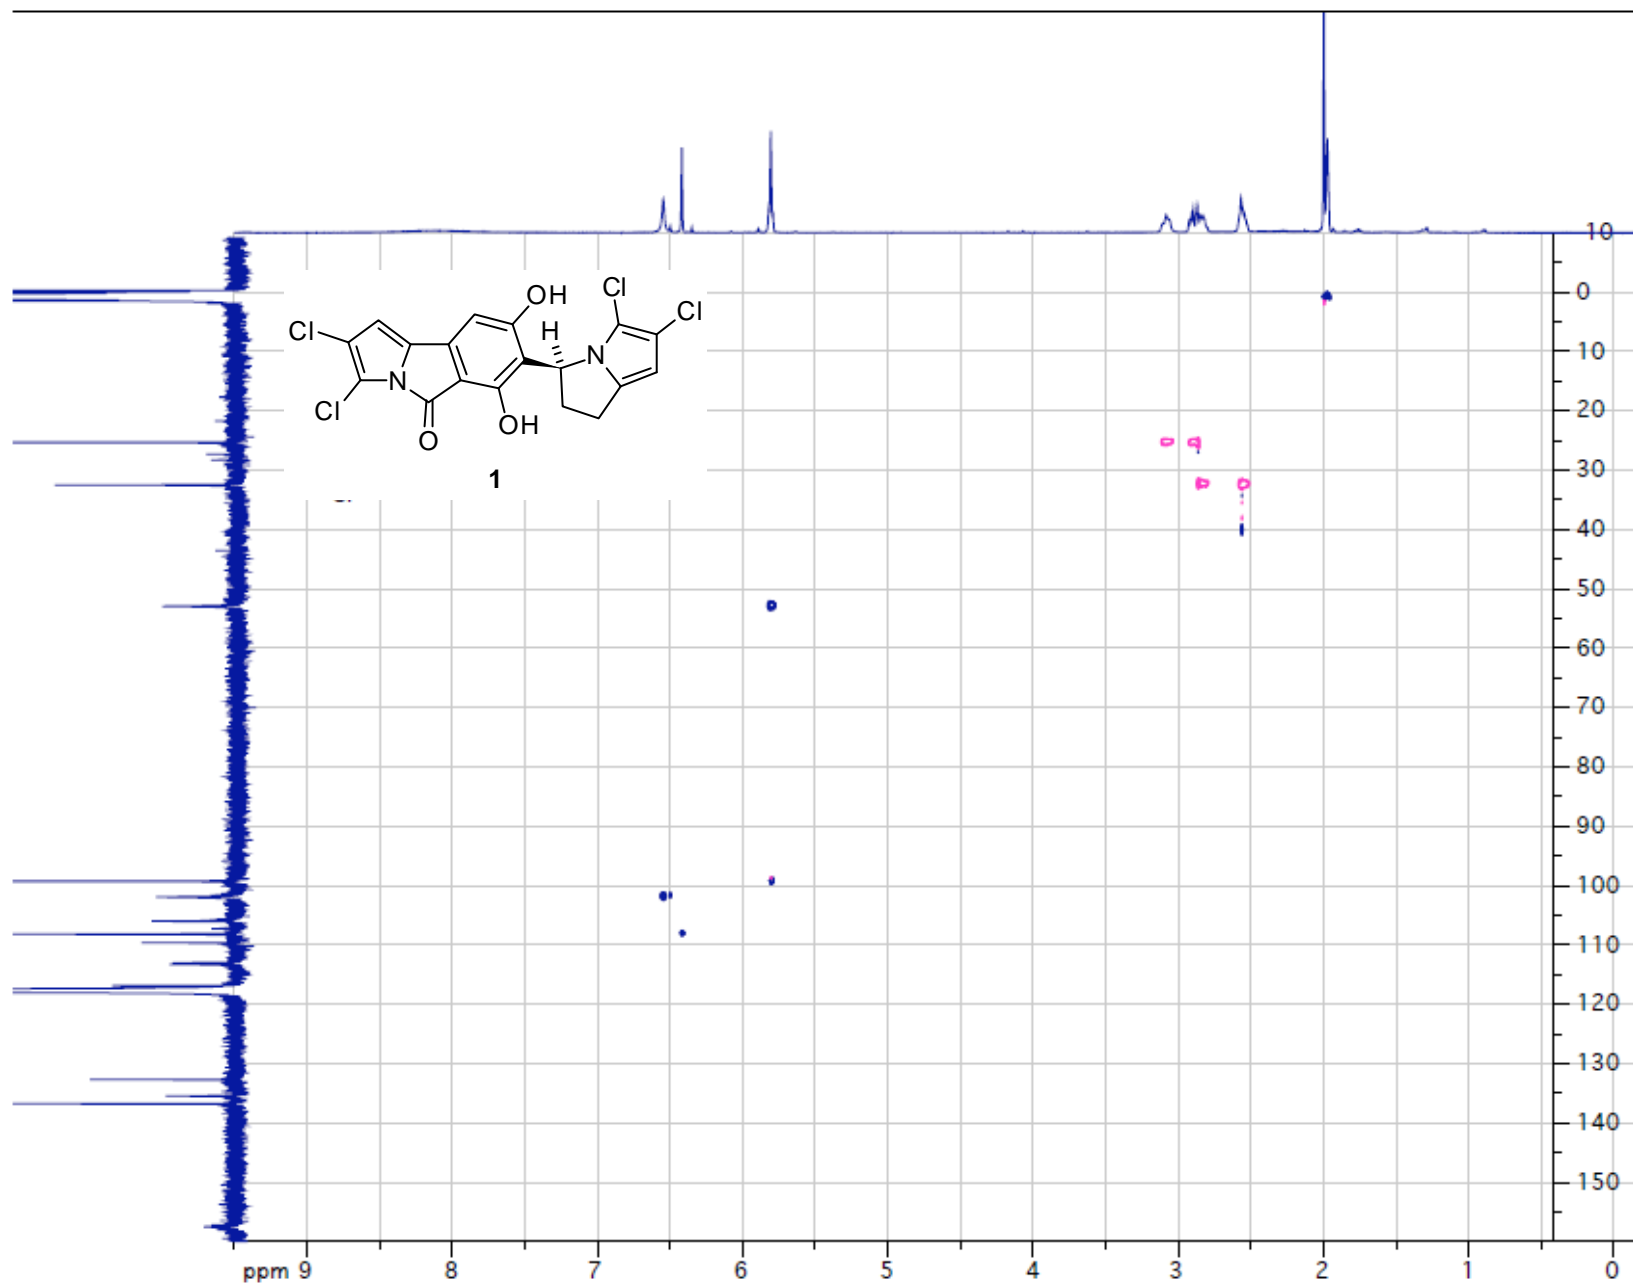

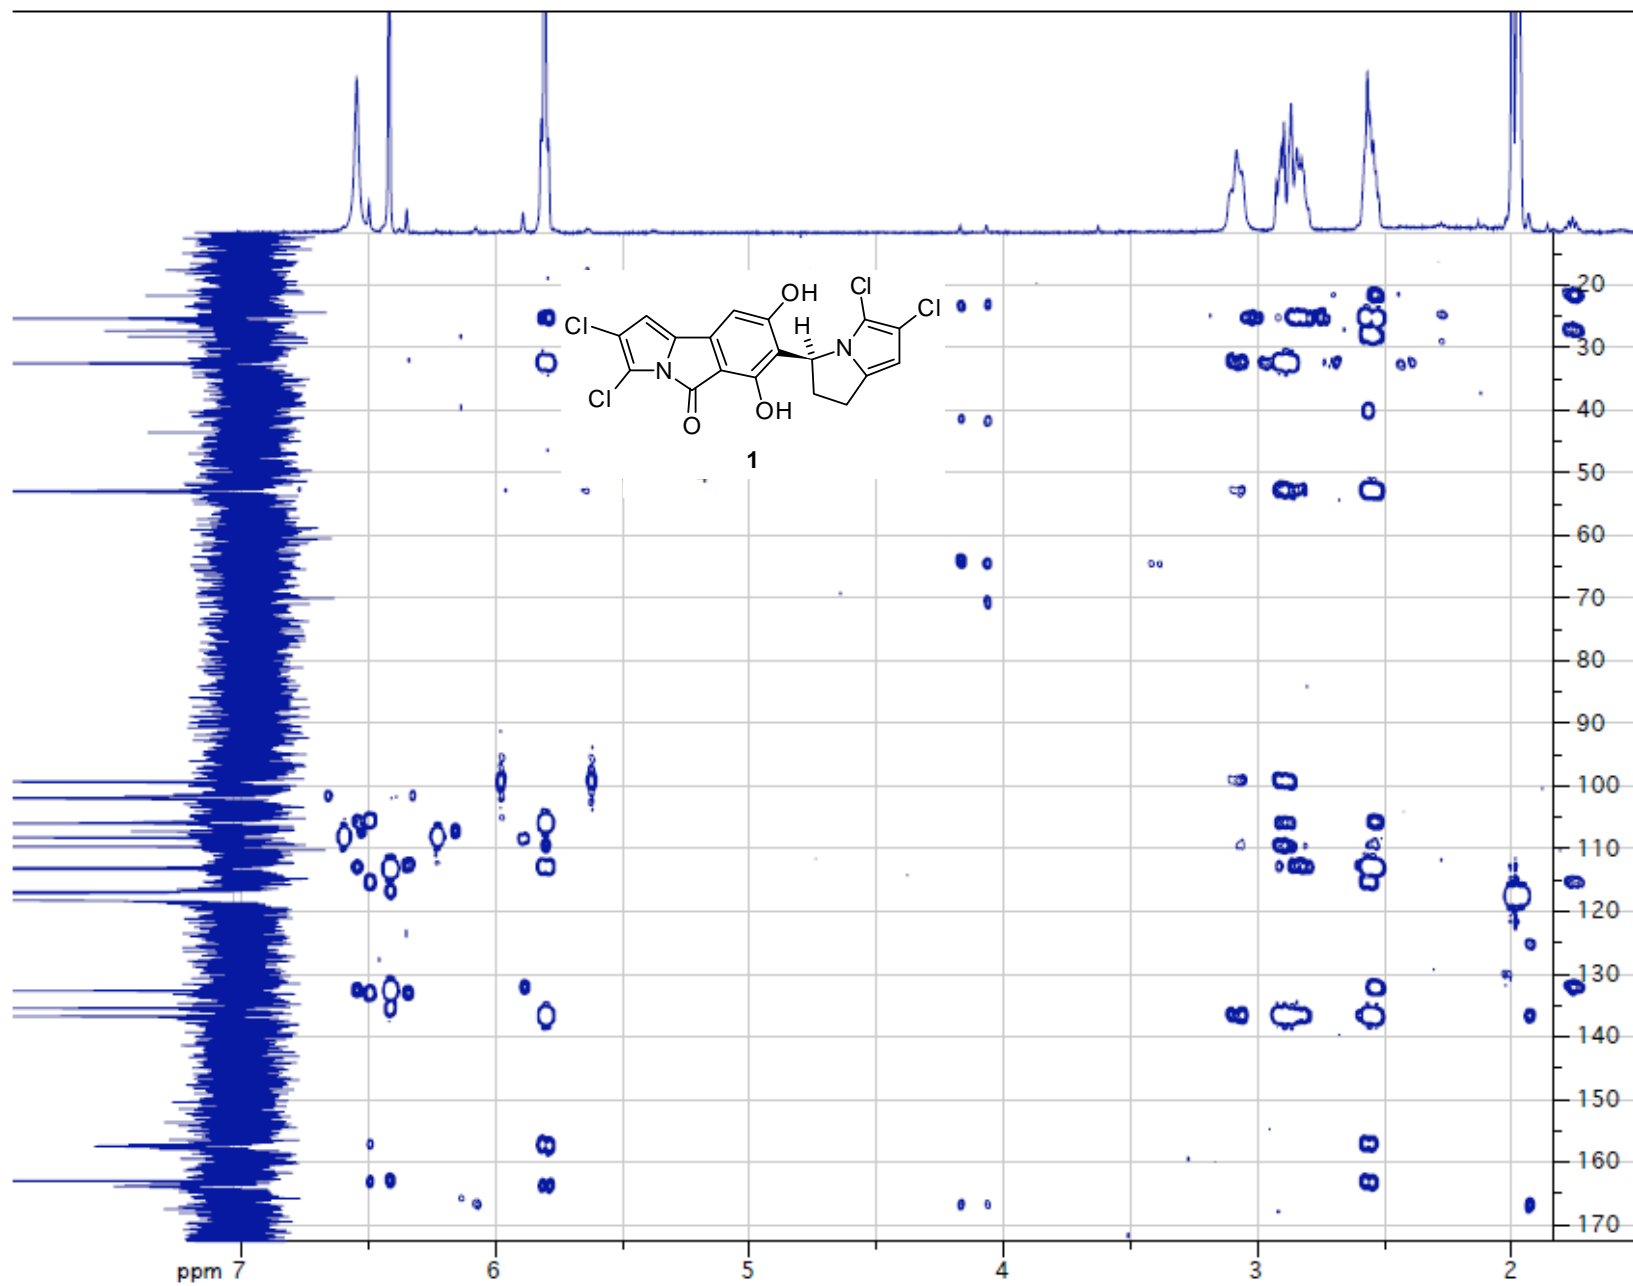

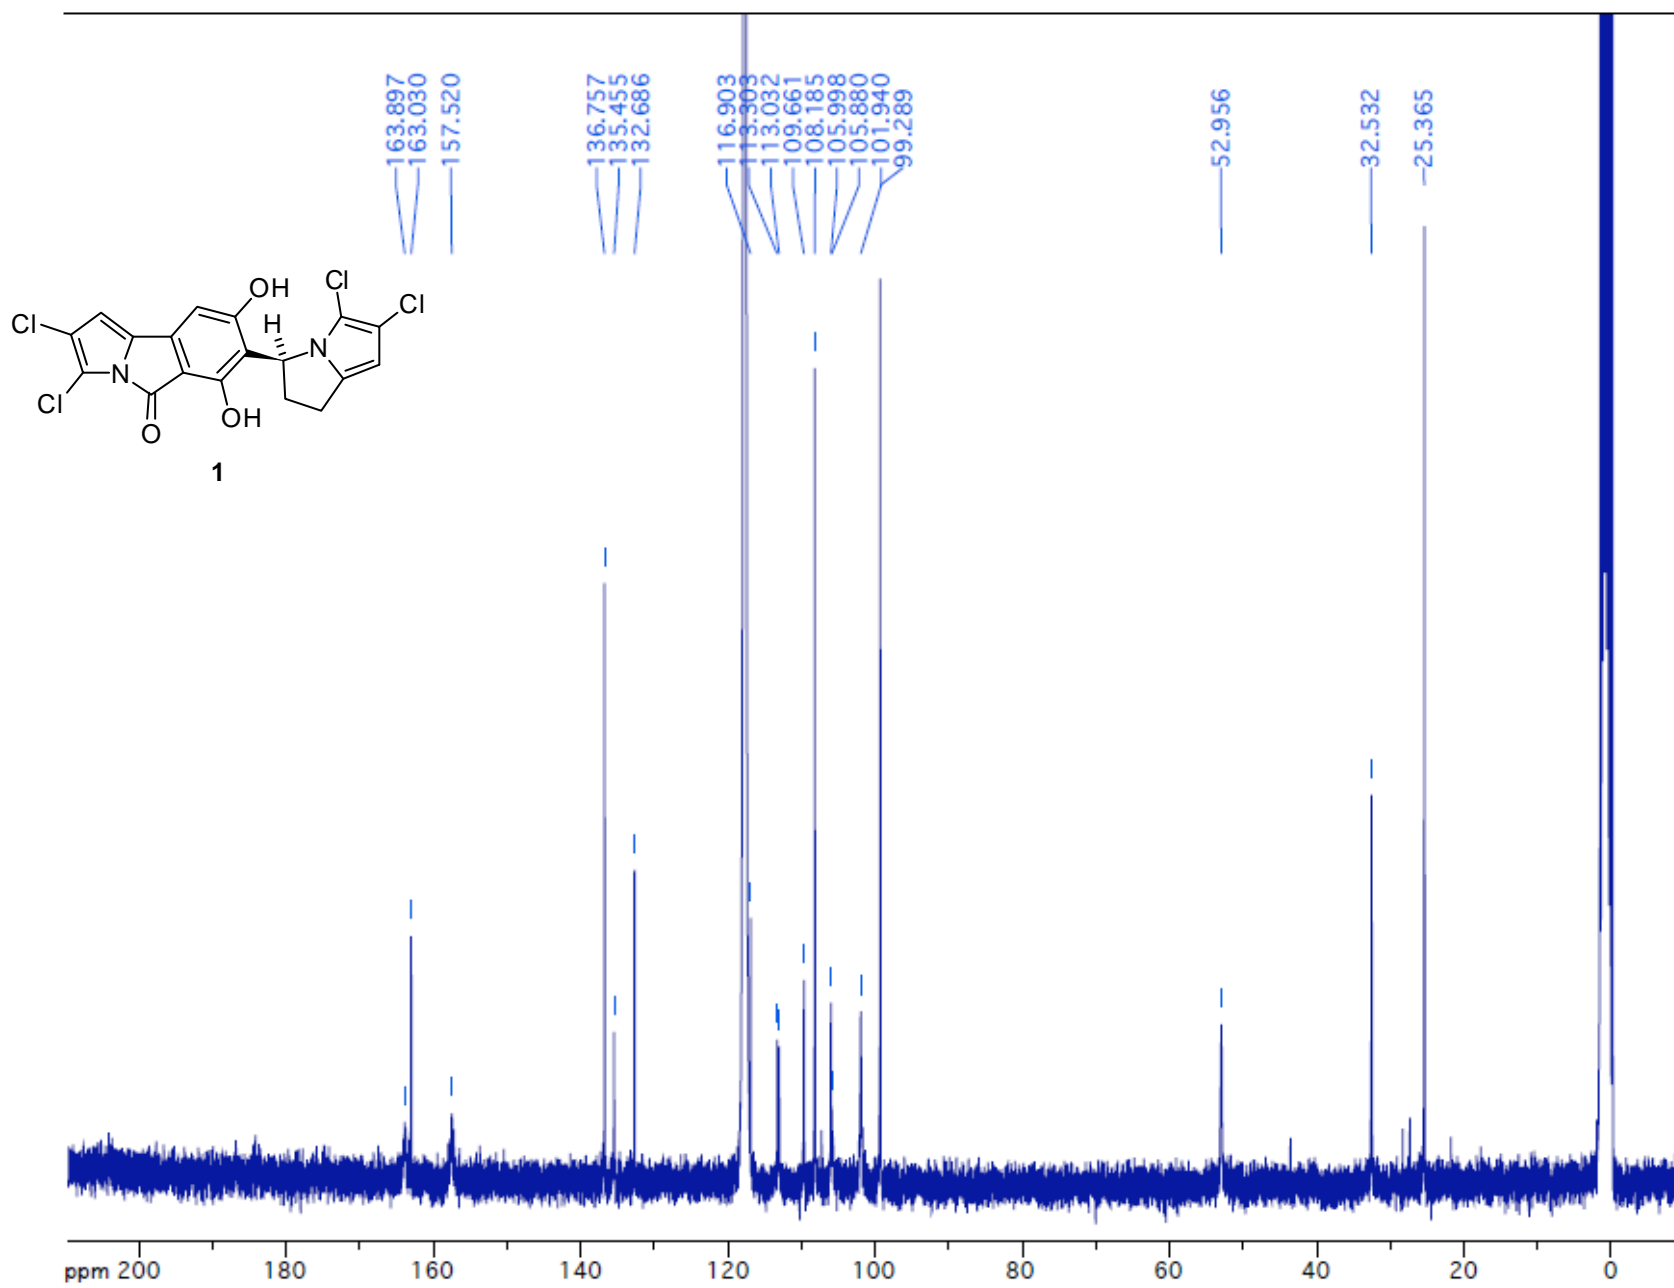

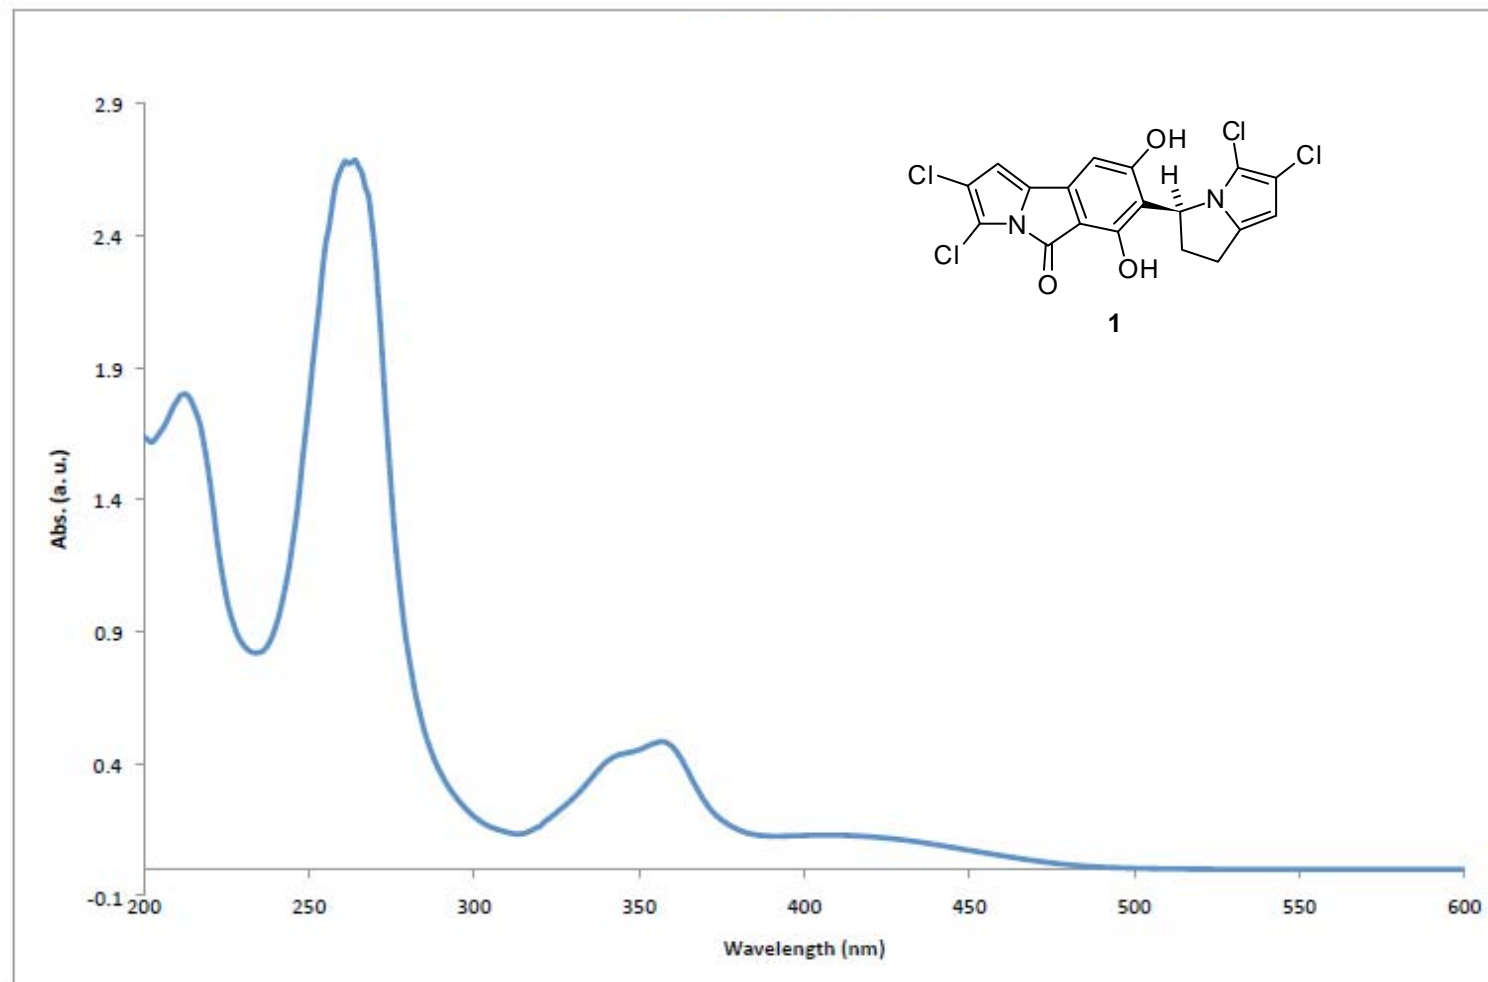

CNH287442 #110-119 RT: 1.47-1.55 AV: 10 NL: 1.85E5  
T: FTMS + p ESI Full ms [200.00-1000.00]

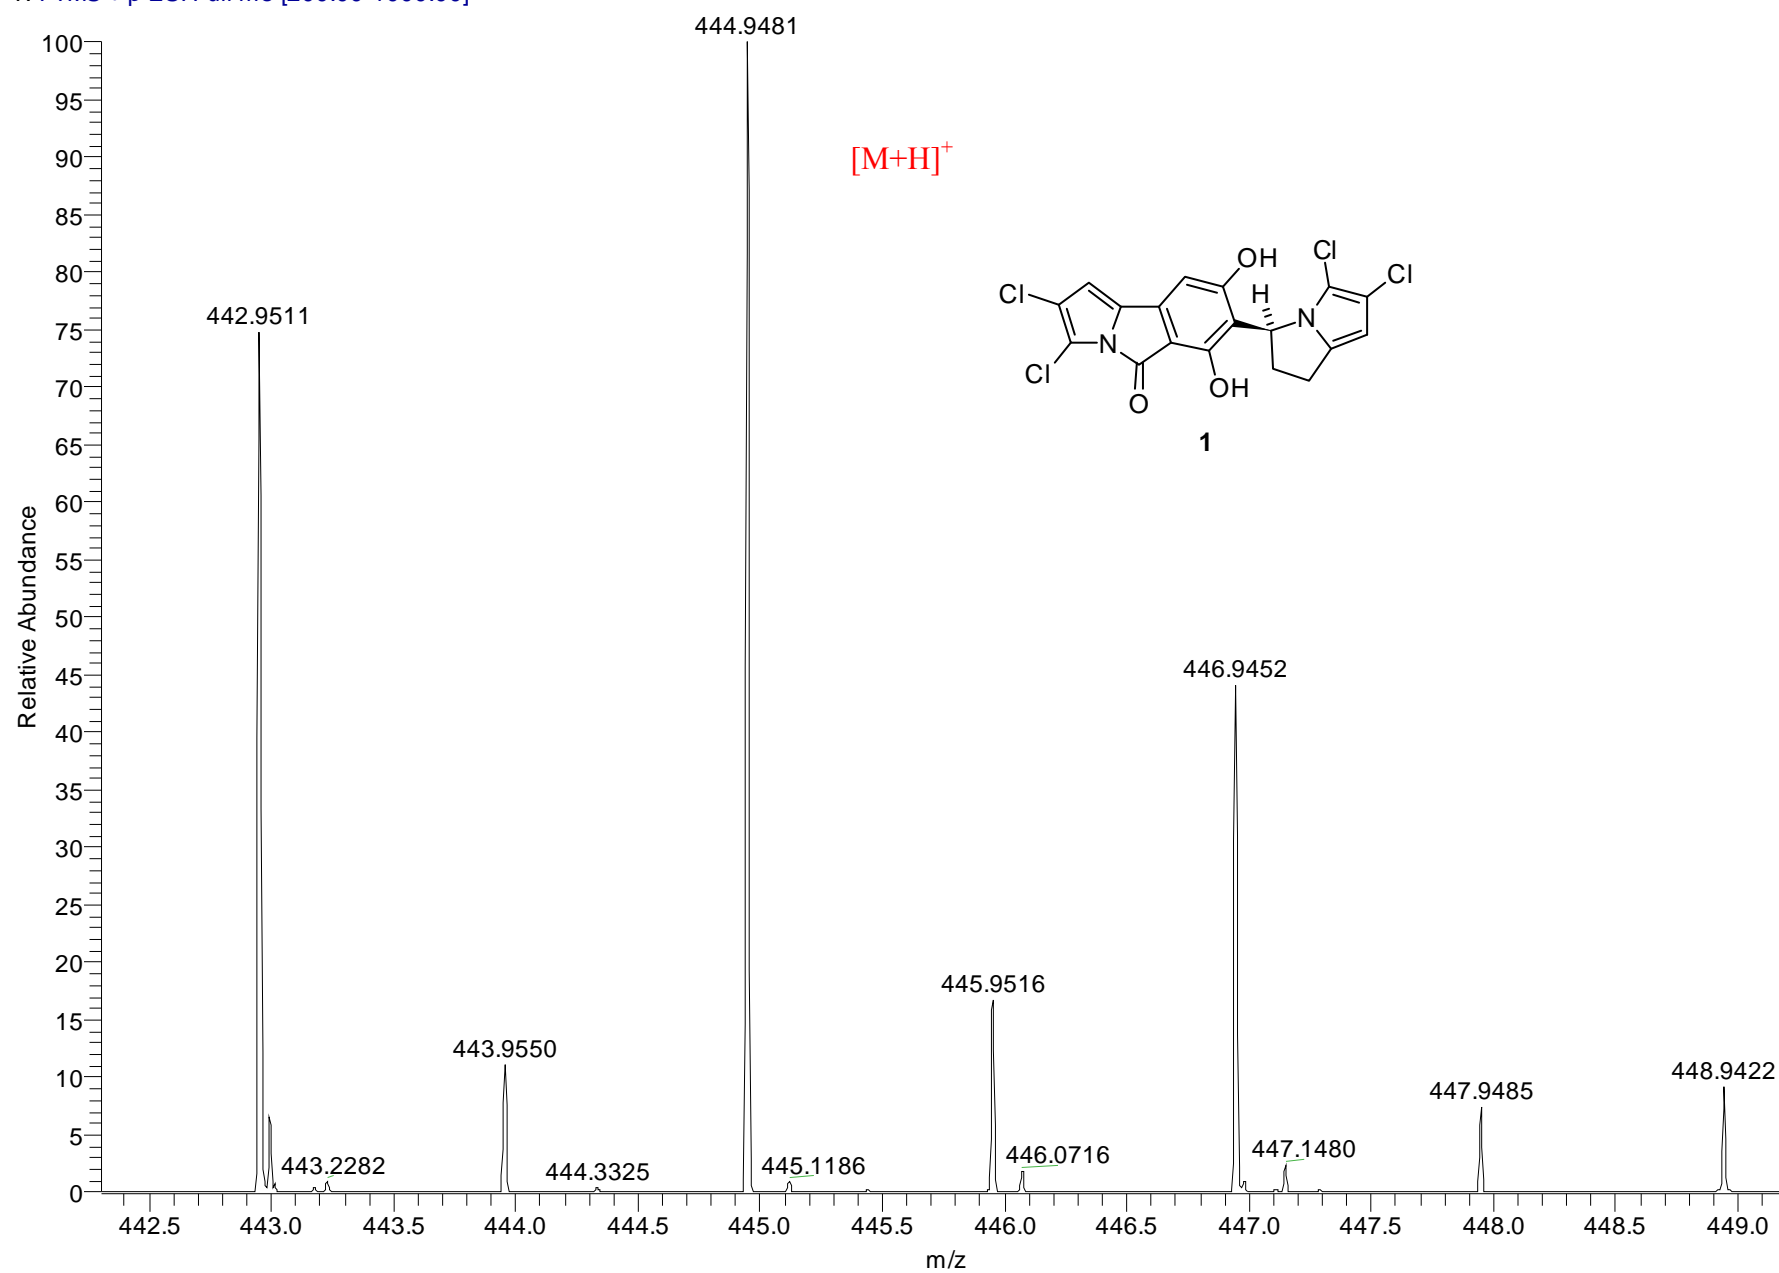

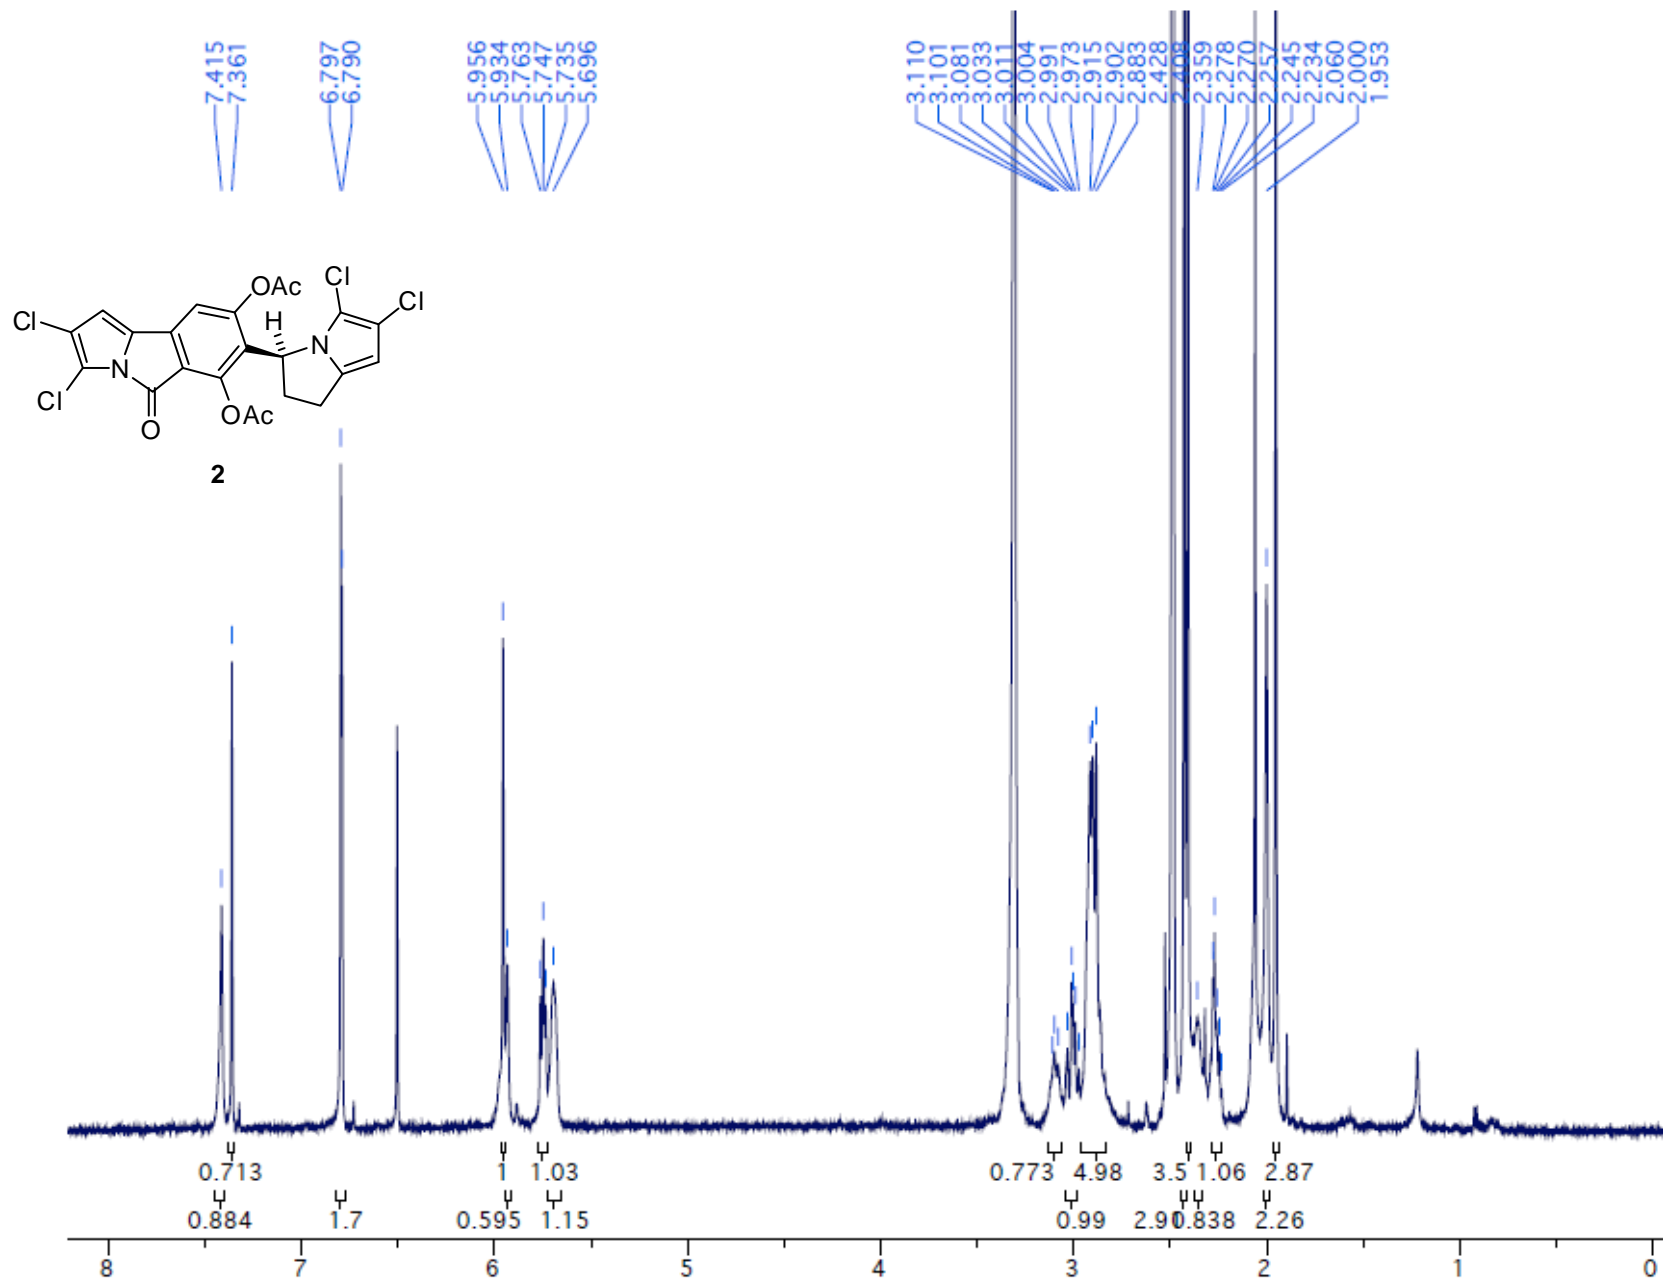

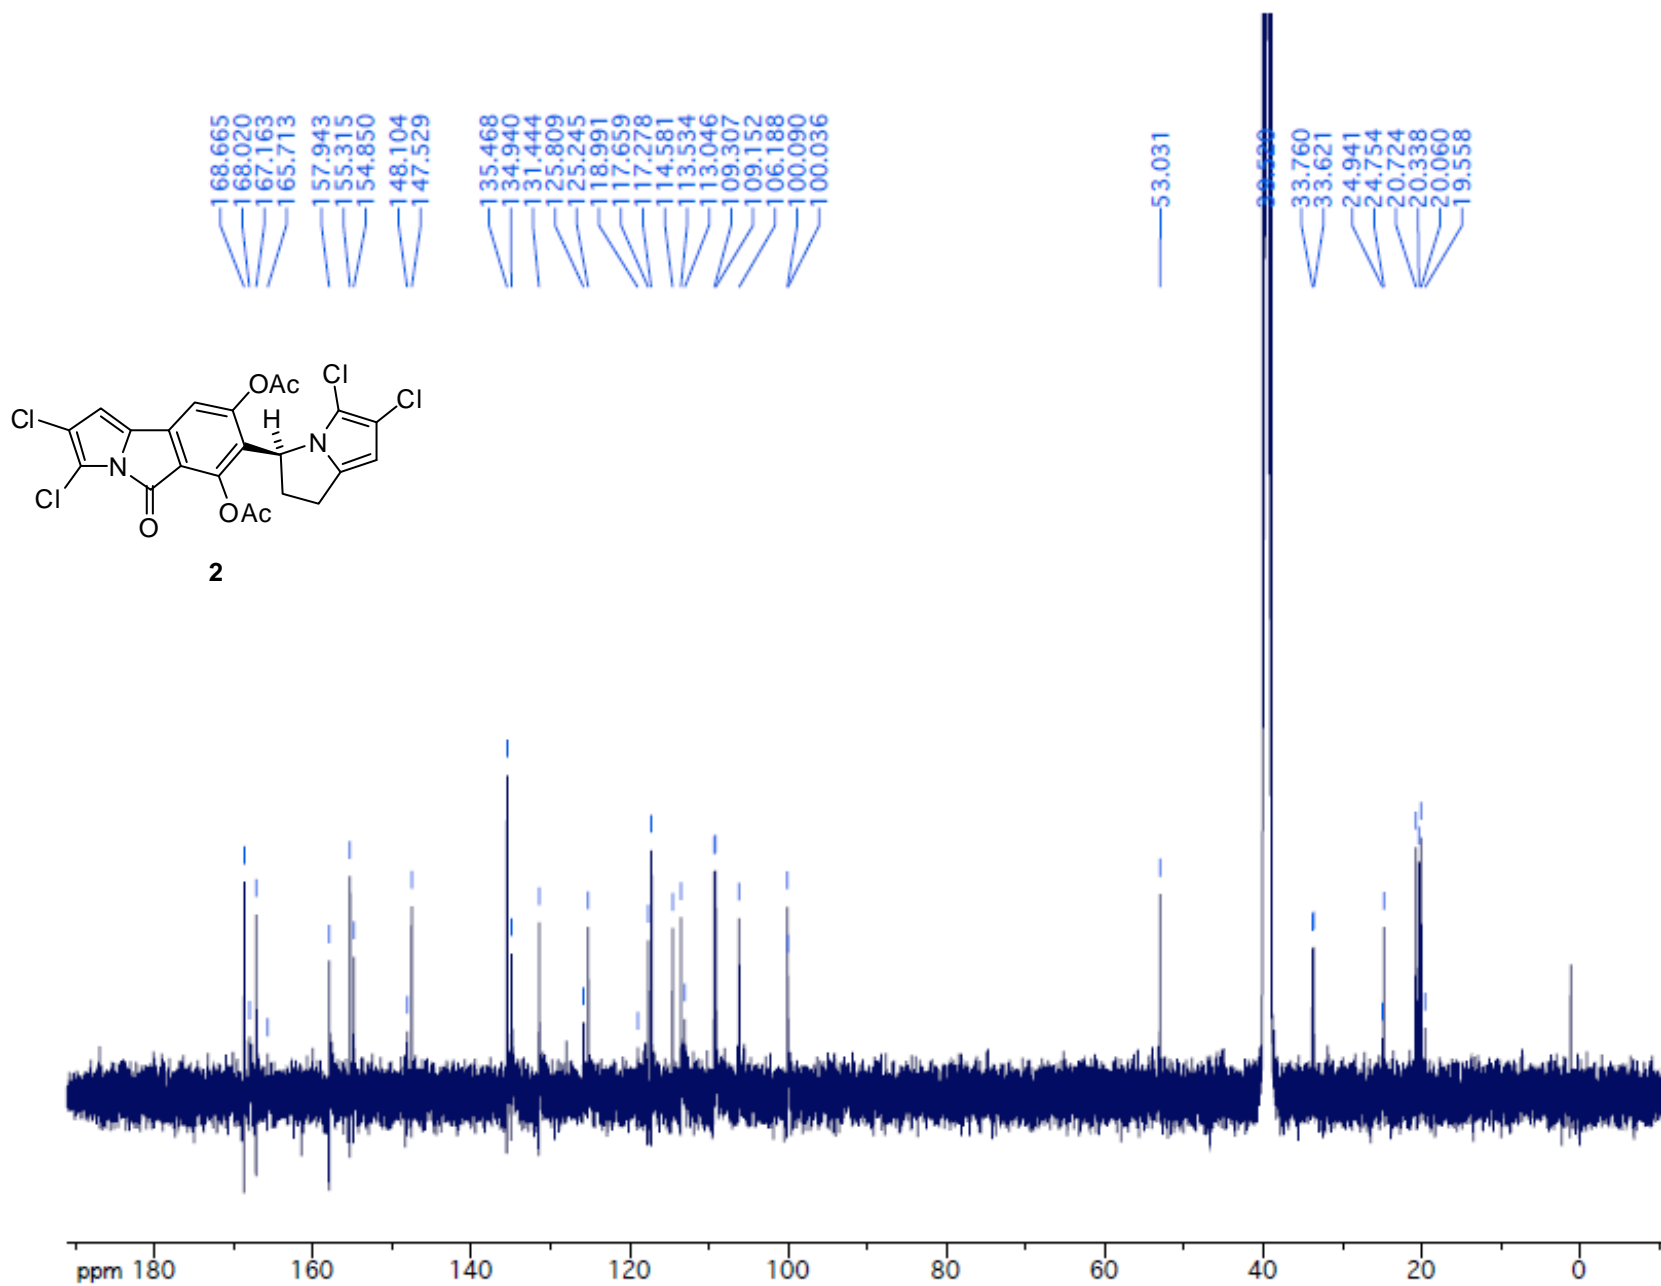



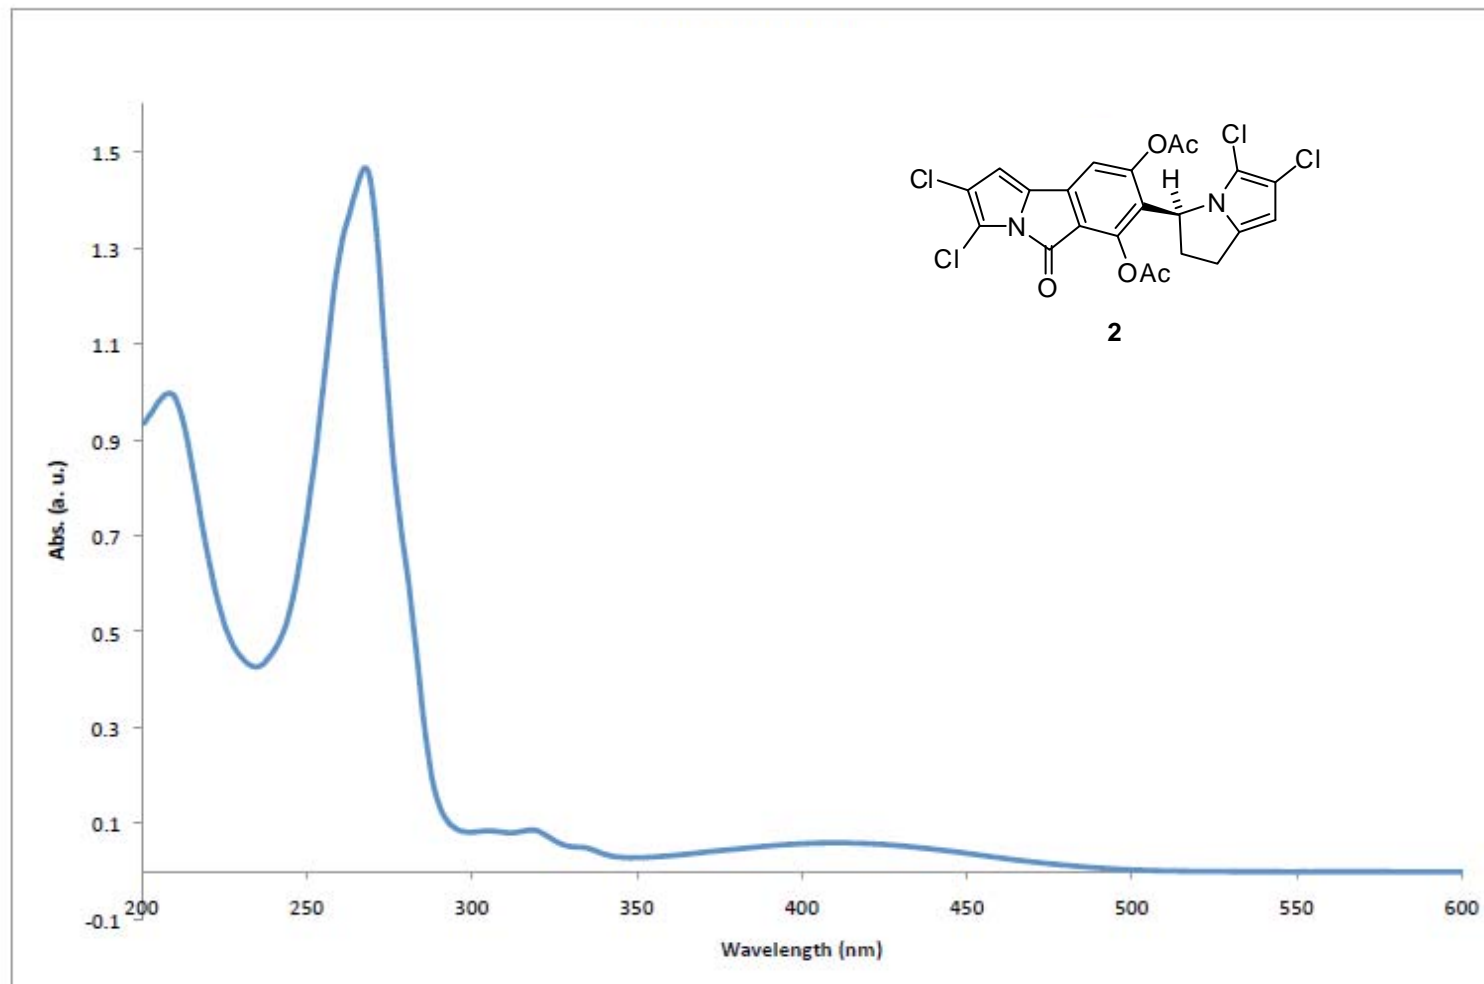

HRESI-FT-MS (Orbit-Trap-MS) of diacetyl chlorizidine A (2)

H287-Ac #114-117 RT: 0.99-1.02 AV: 4 NL: 1.31E6  
 T: FTMS + p ESI Full ms [100.00-2000.00]

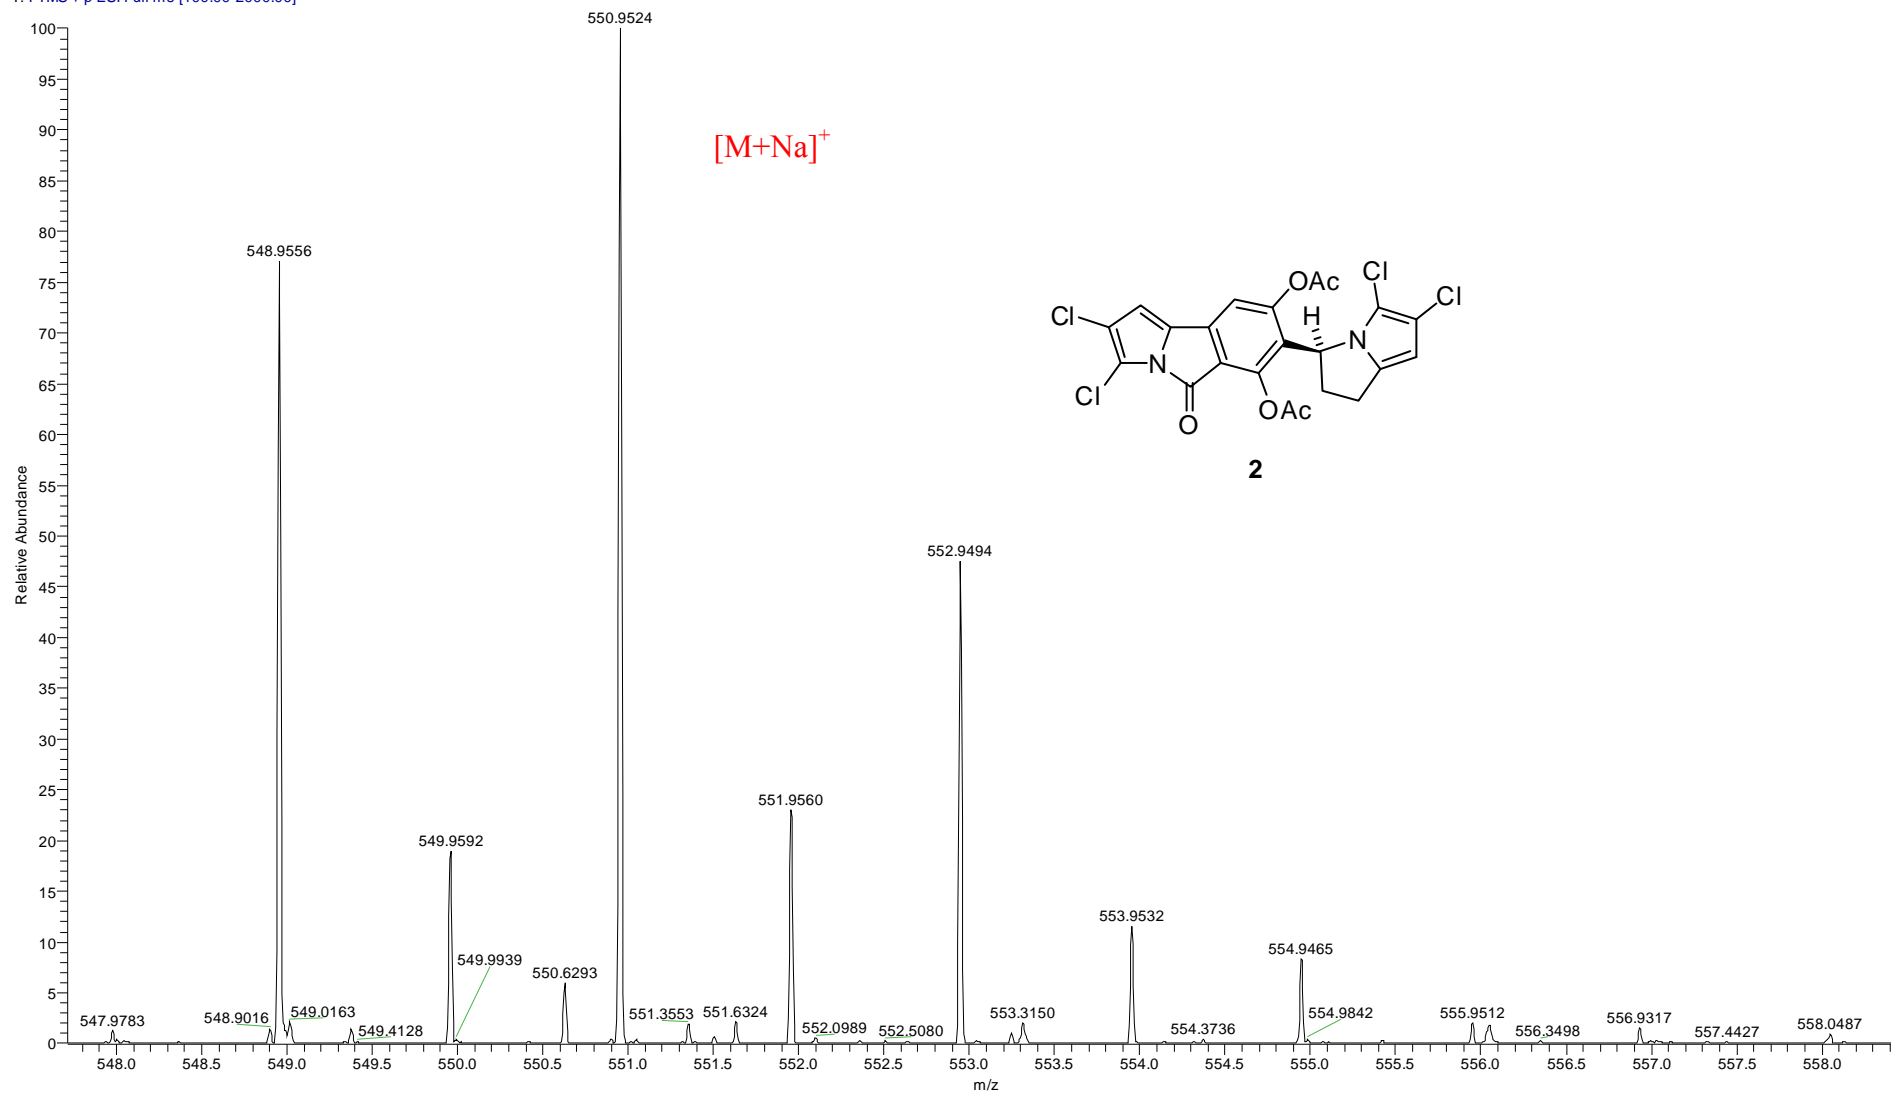

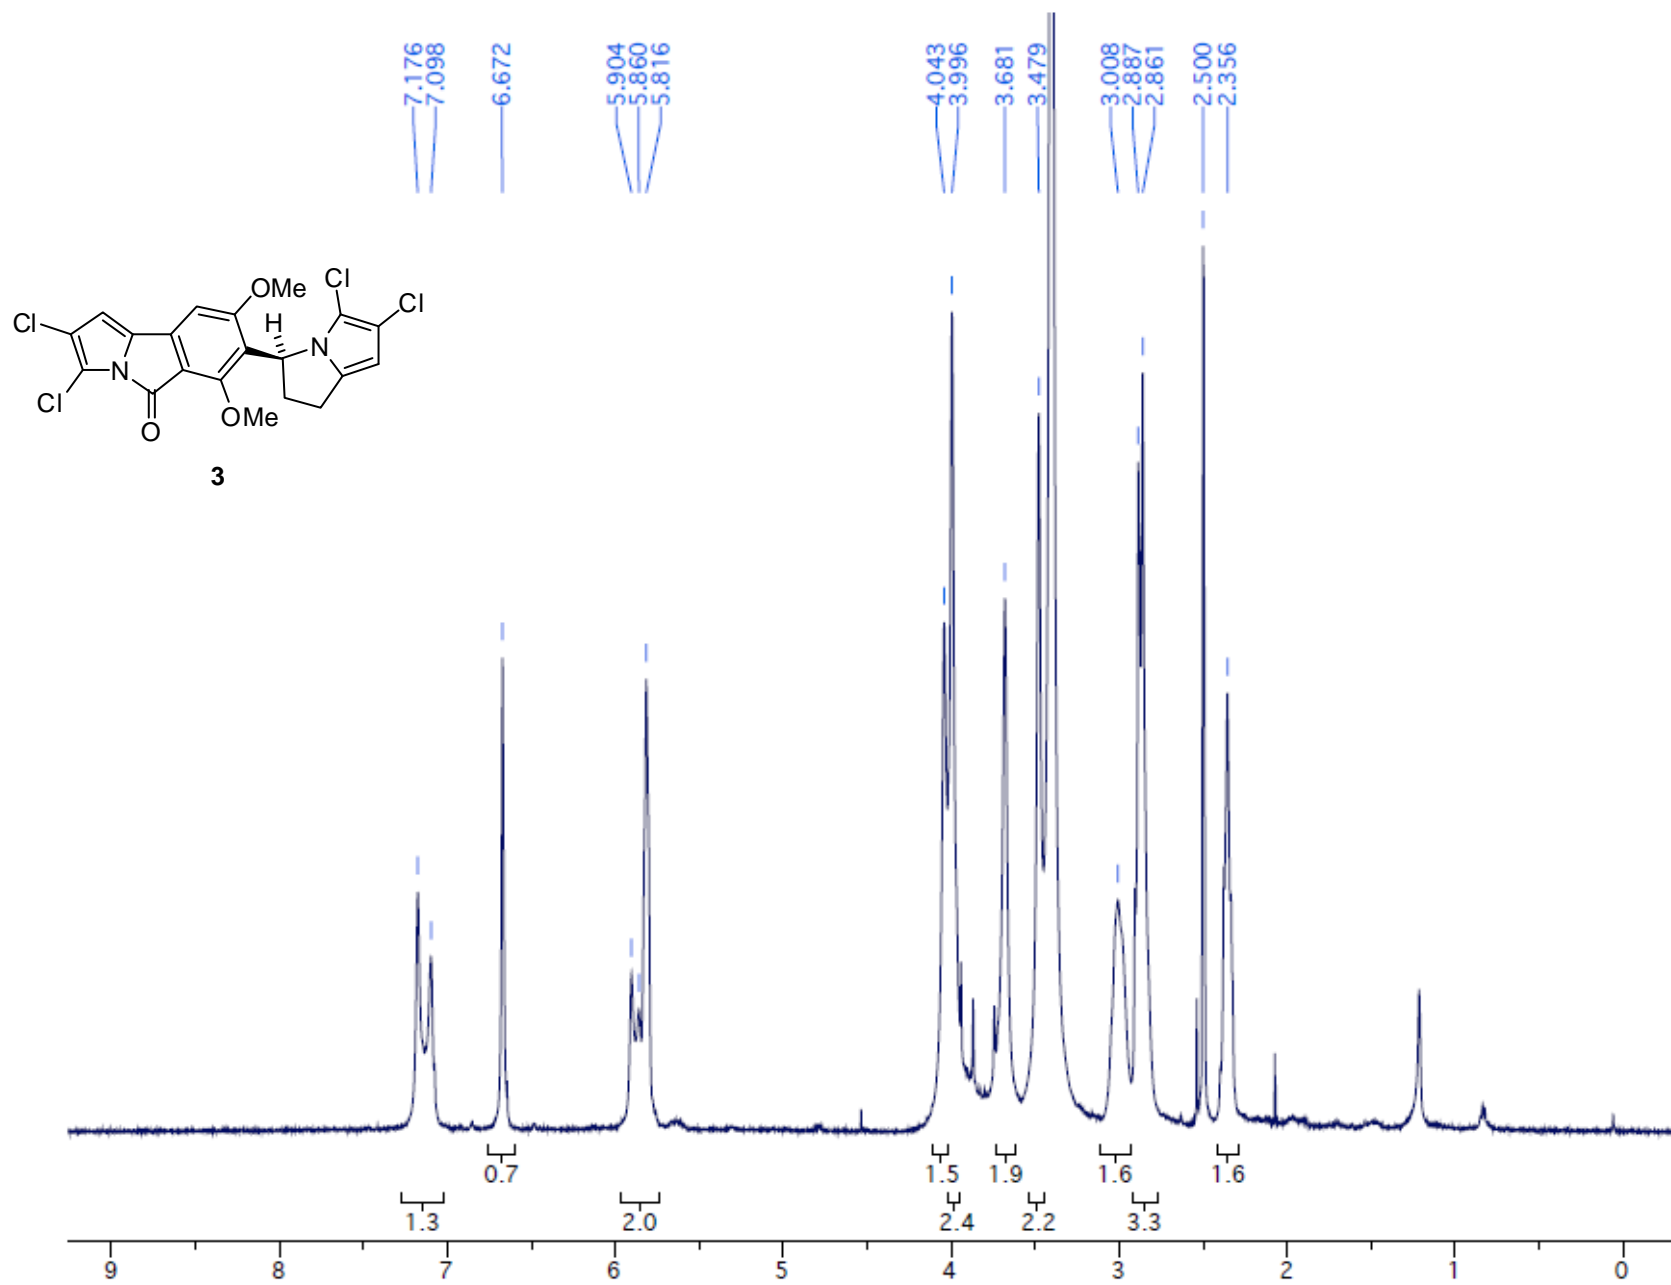

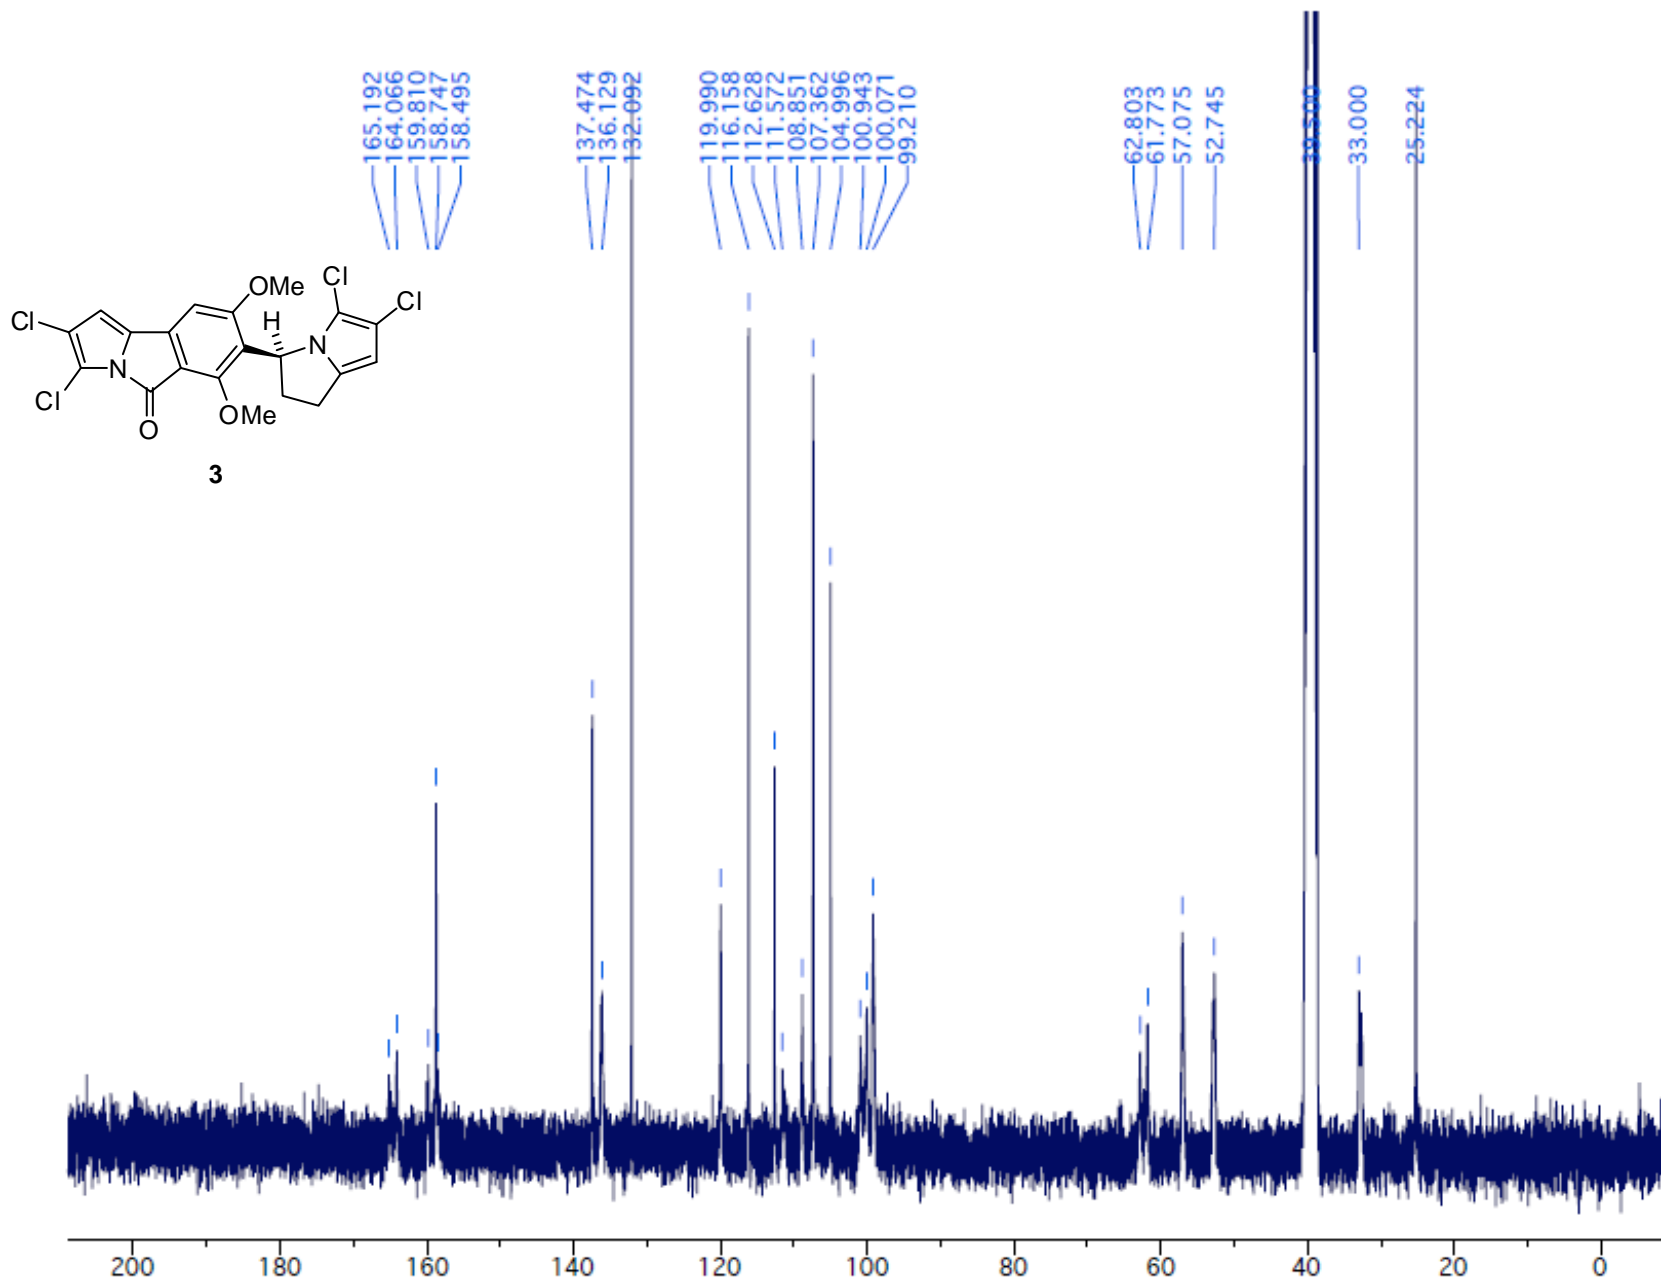

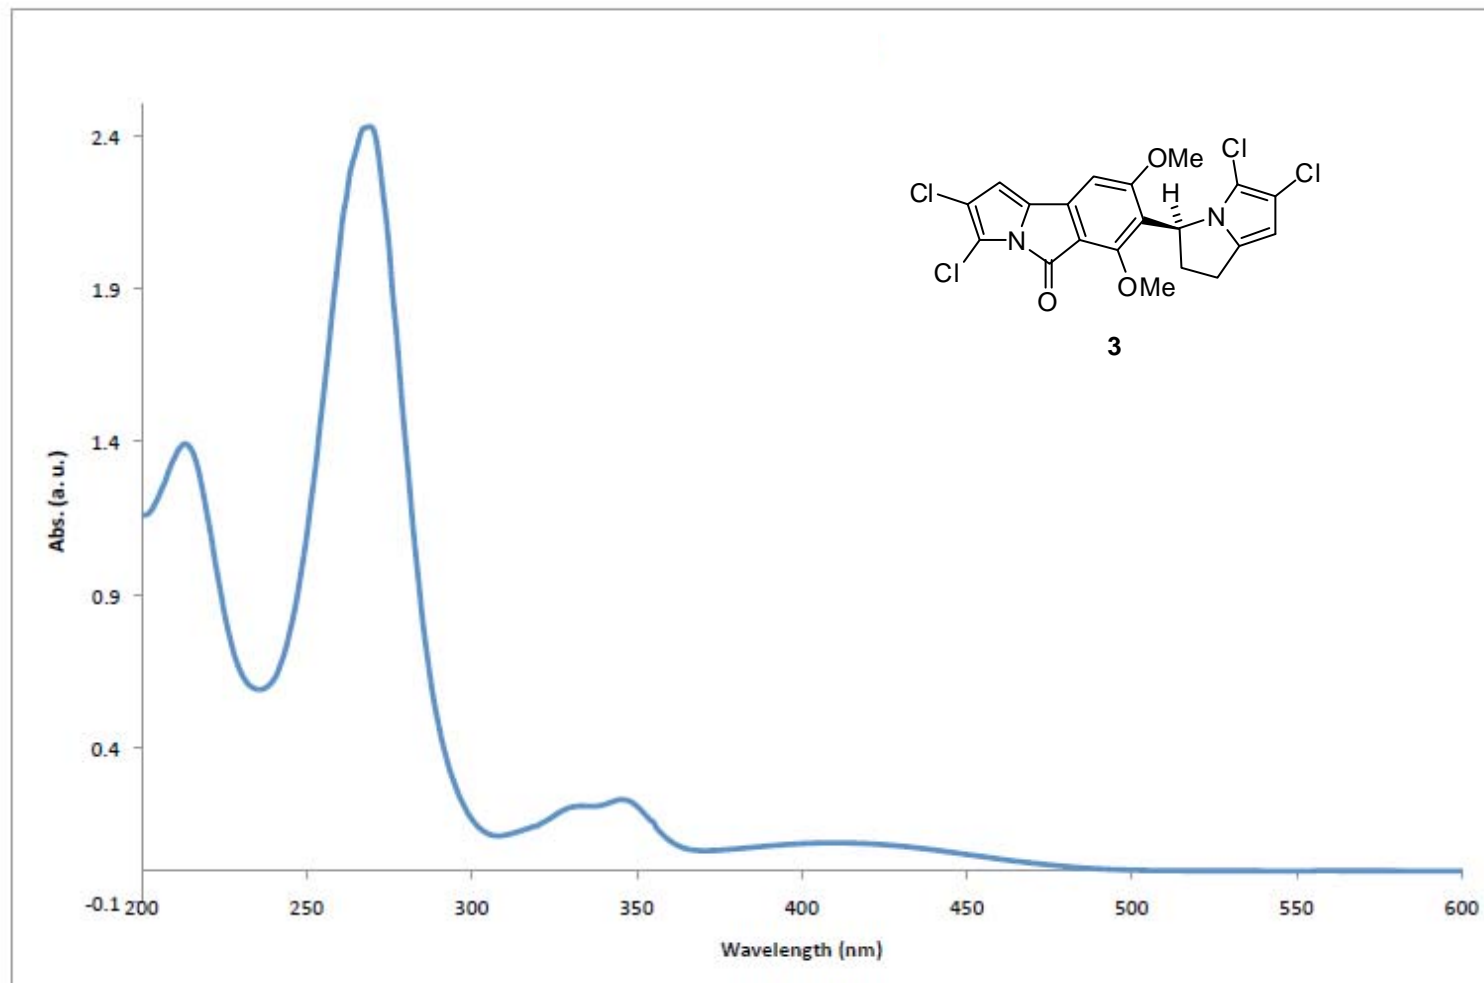

# HRESI-FT-MS (Orbit-Trap-MS) of dimethyl chlorizidine A (3)

H287-Me #554-564 RT: 5.07-5.16 AV: 11 NL: 1.41E6  
T: FTMS + p ESI Full ms [100.00-2000.00]

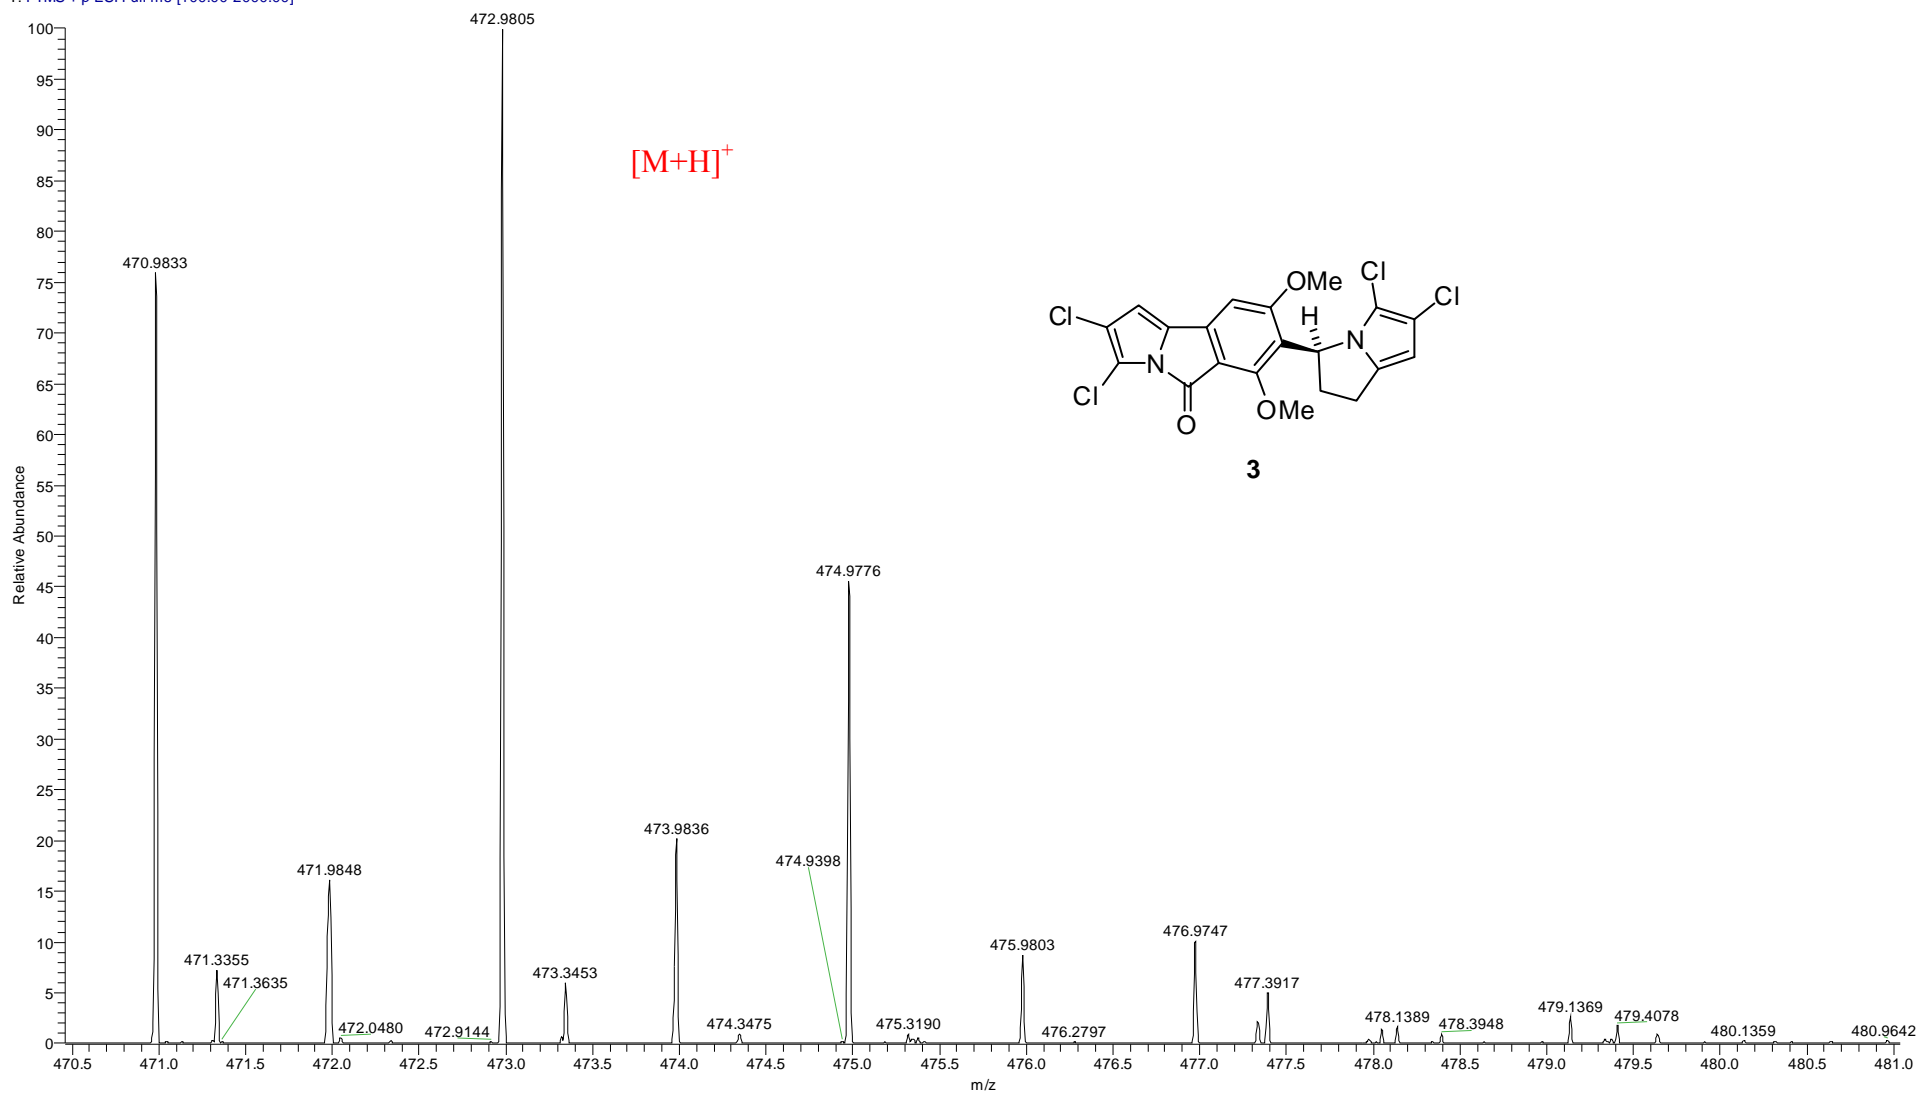

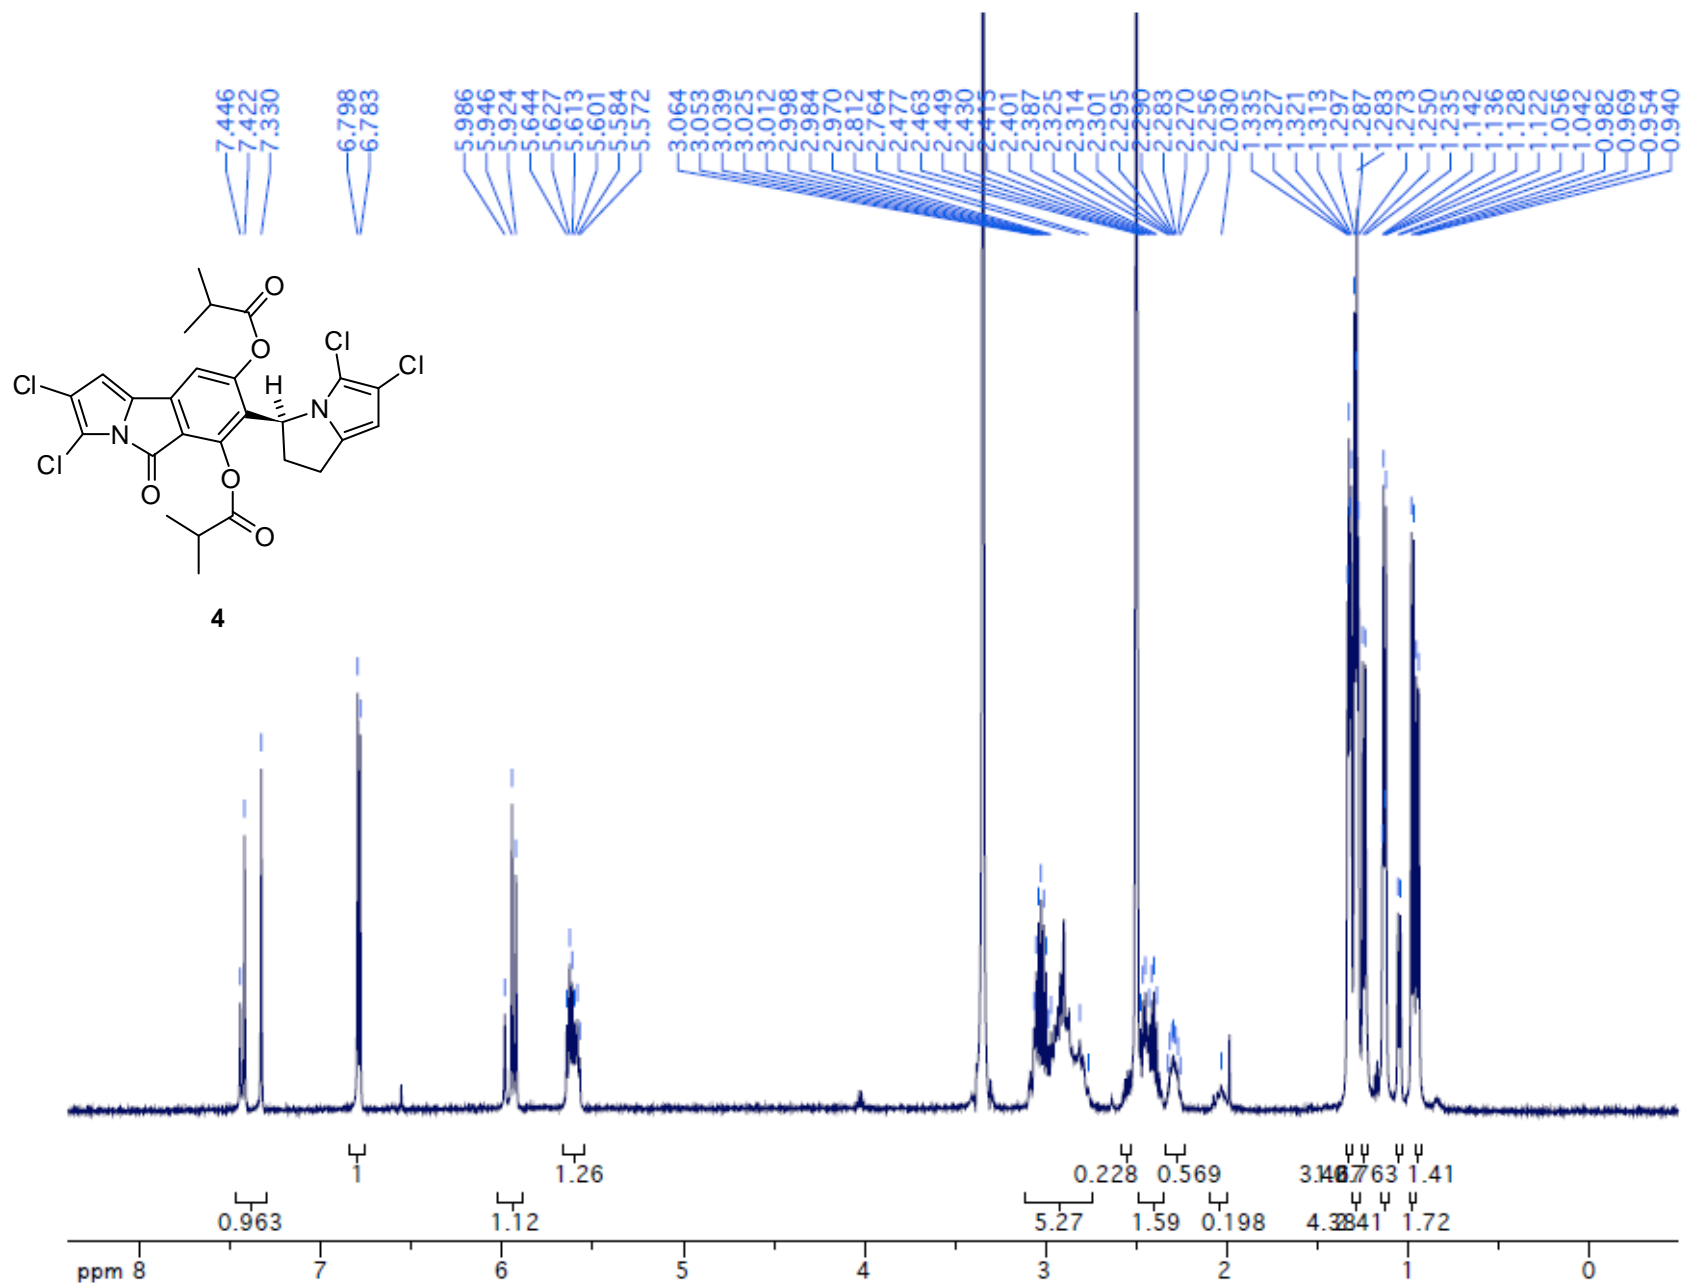

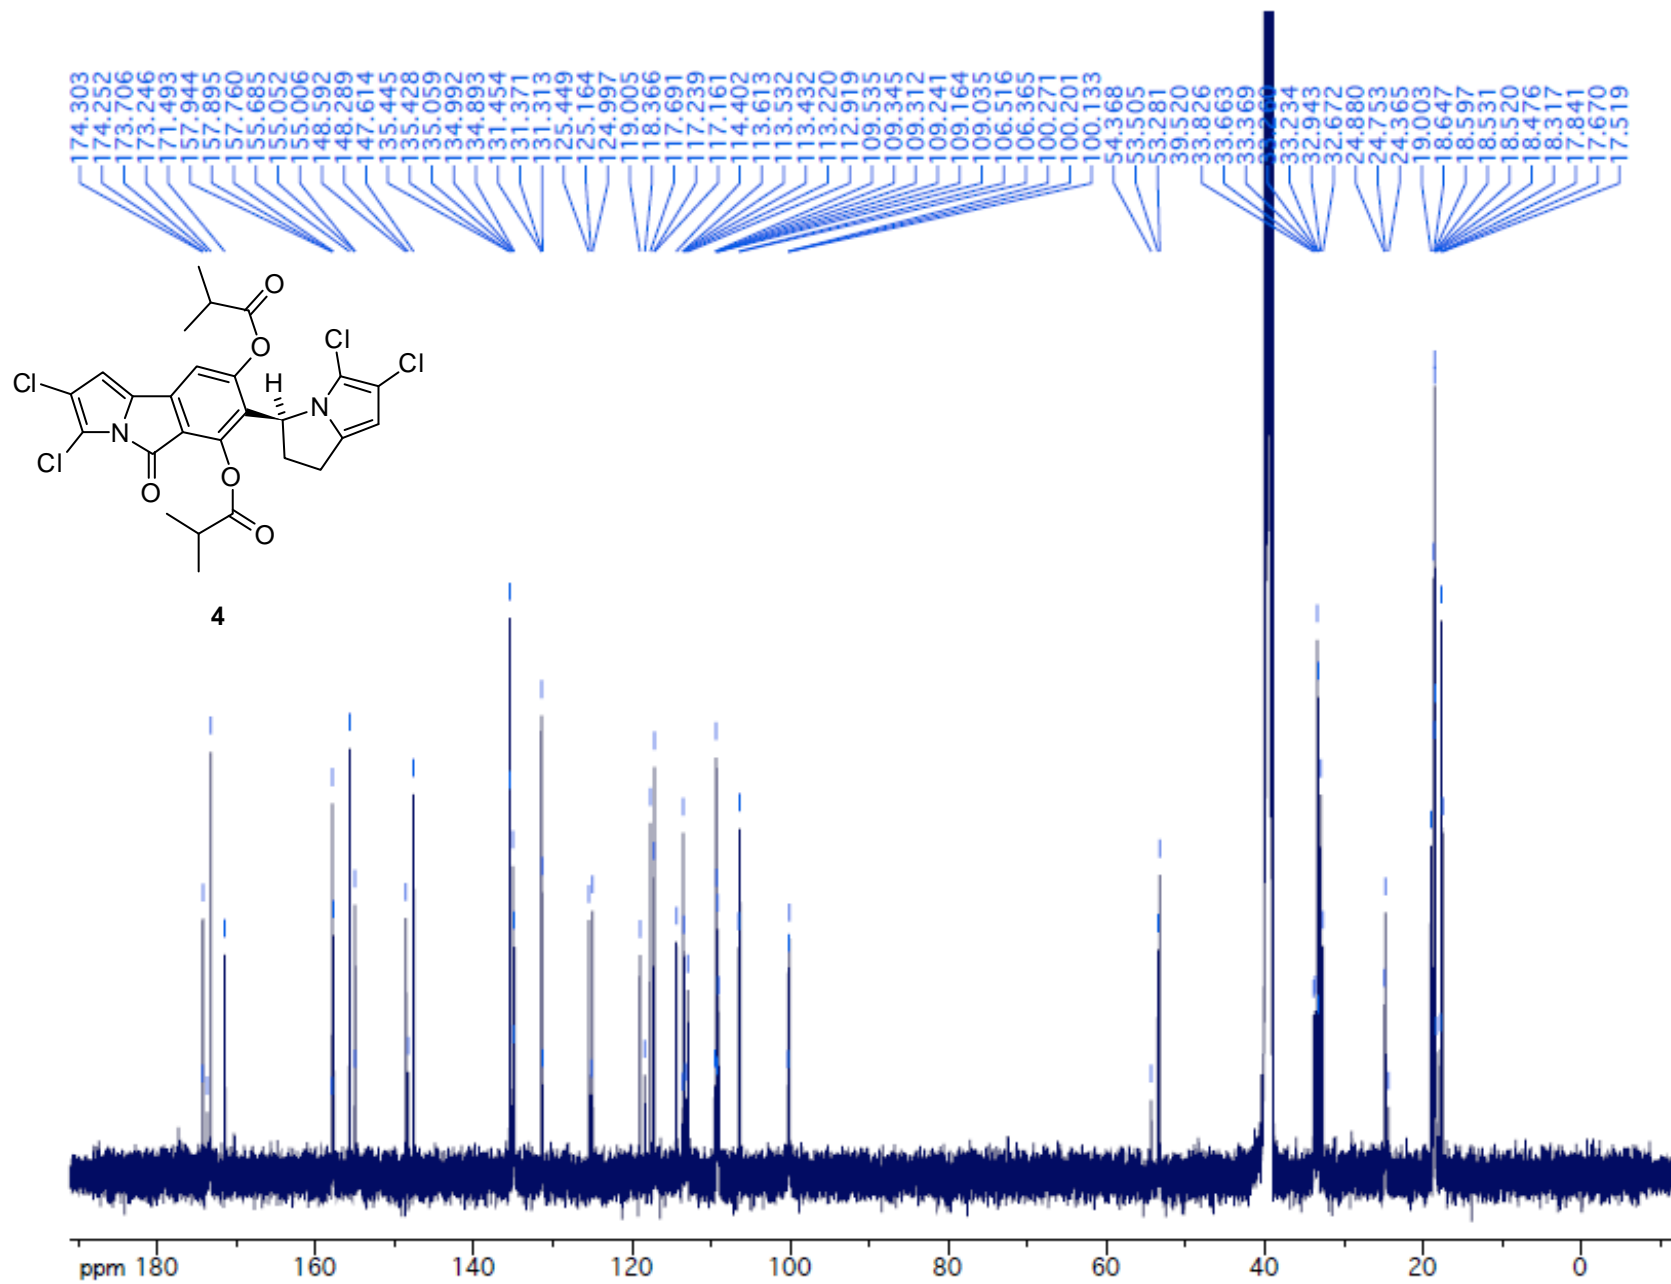



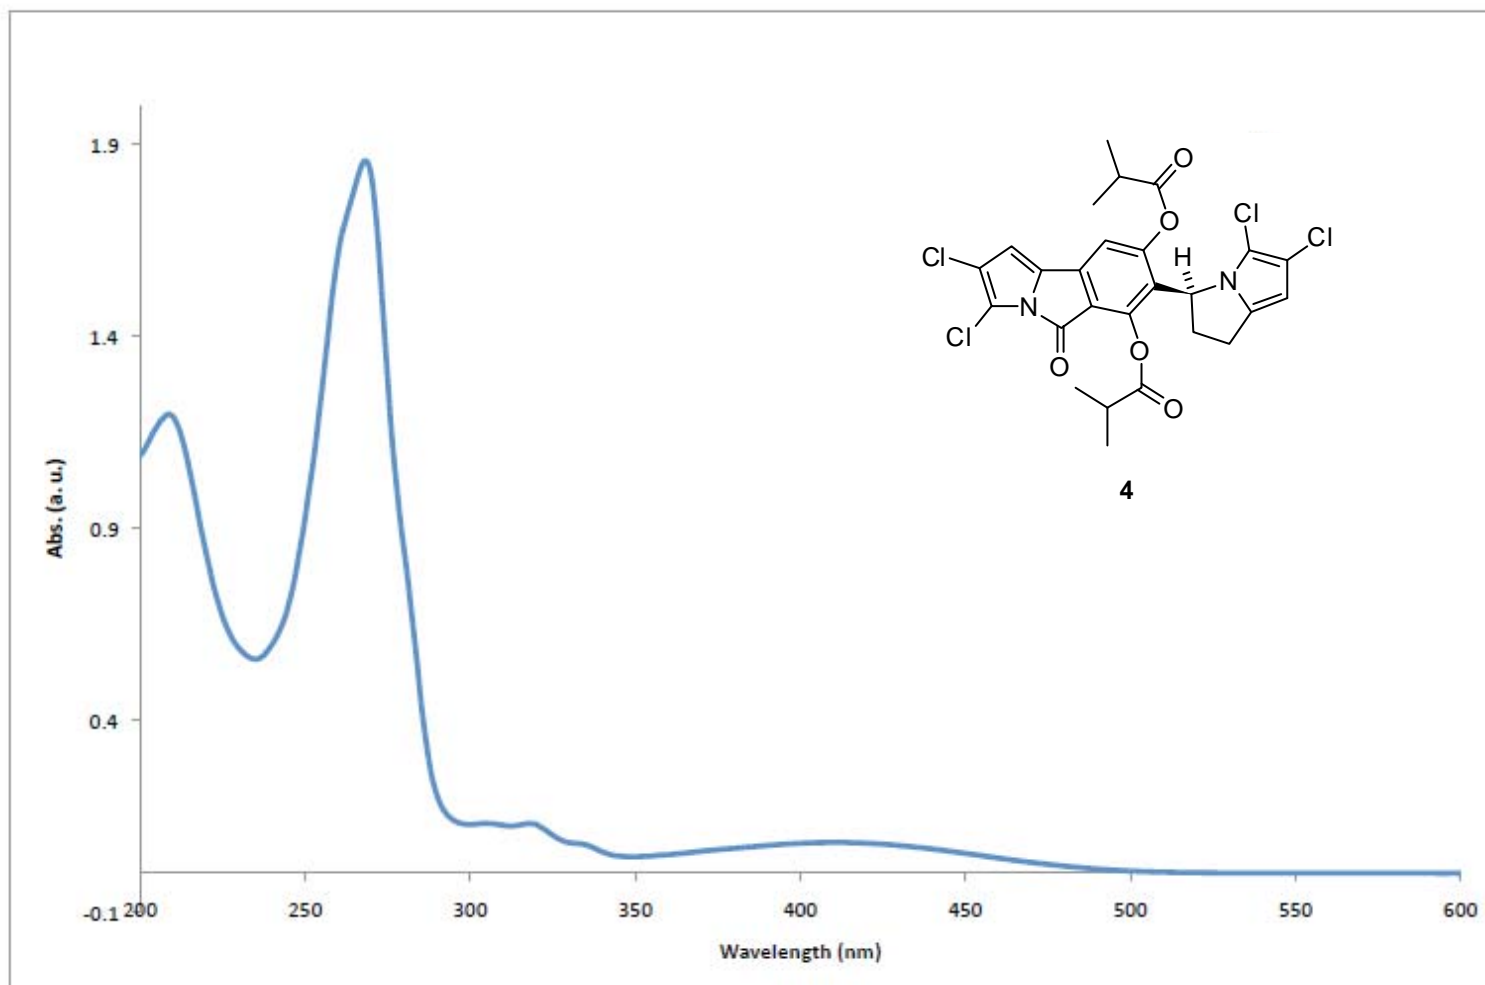

Zsobuty-a #130-135 RT: 2.36-2.47 AV: 6 NL: 8.49E3  
T: FTMS + p ESI Full ms [100.00-2000.00]

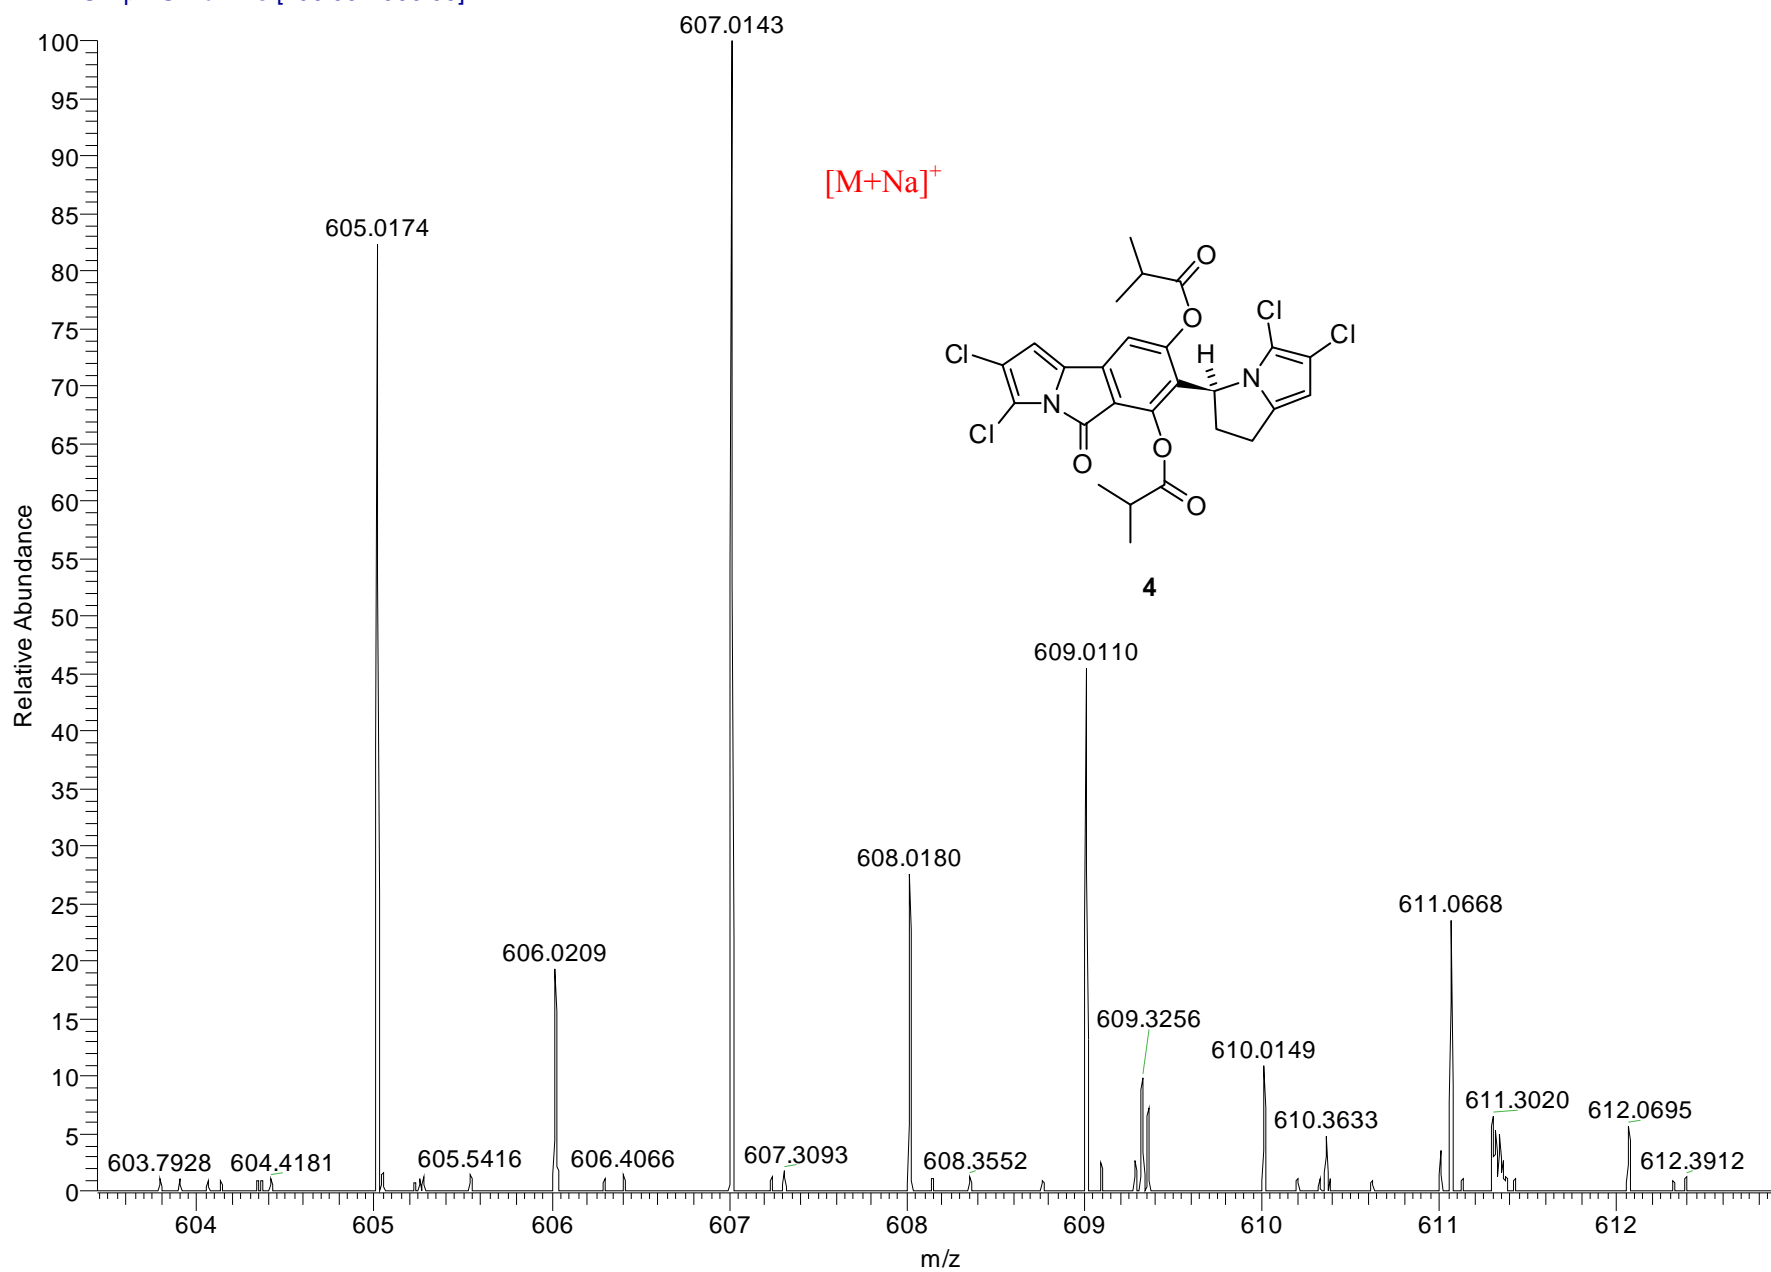

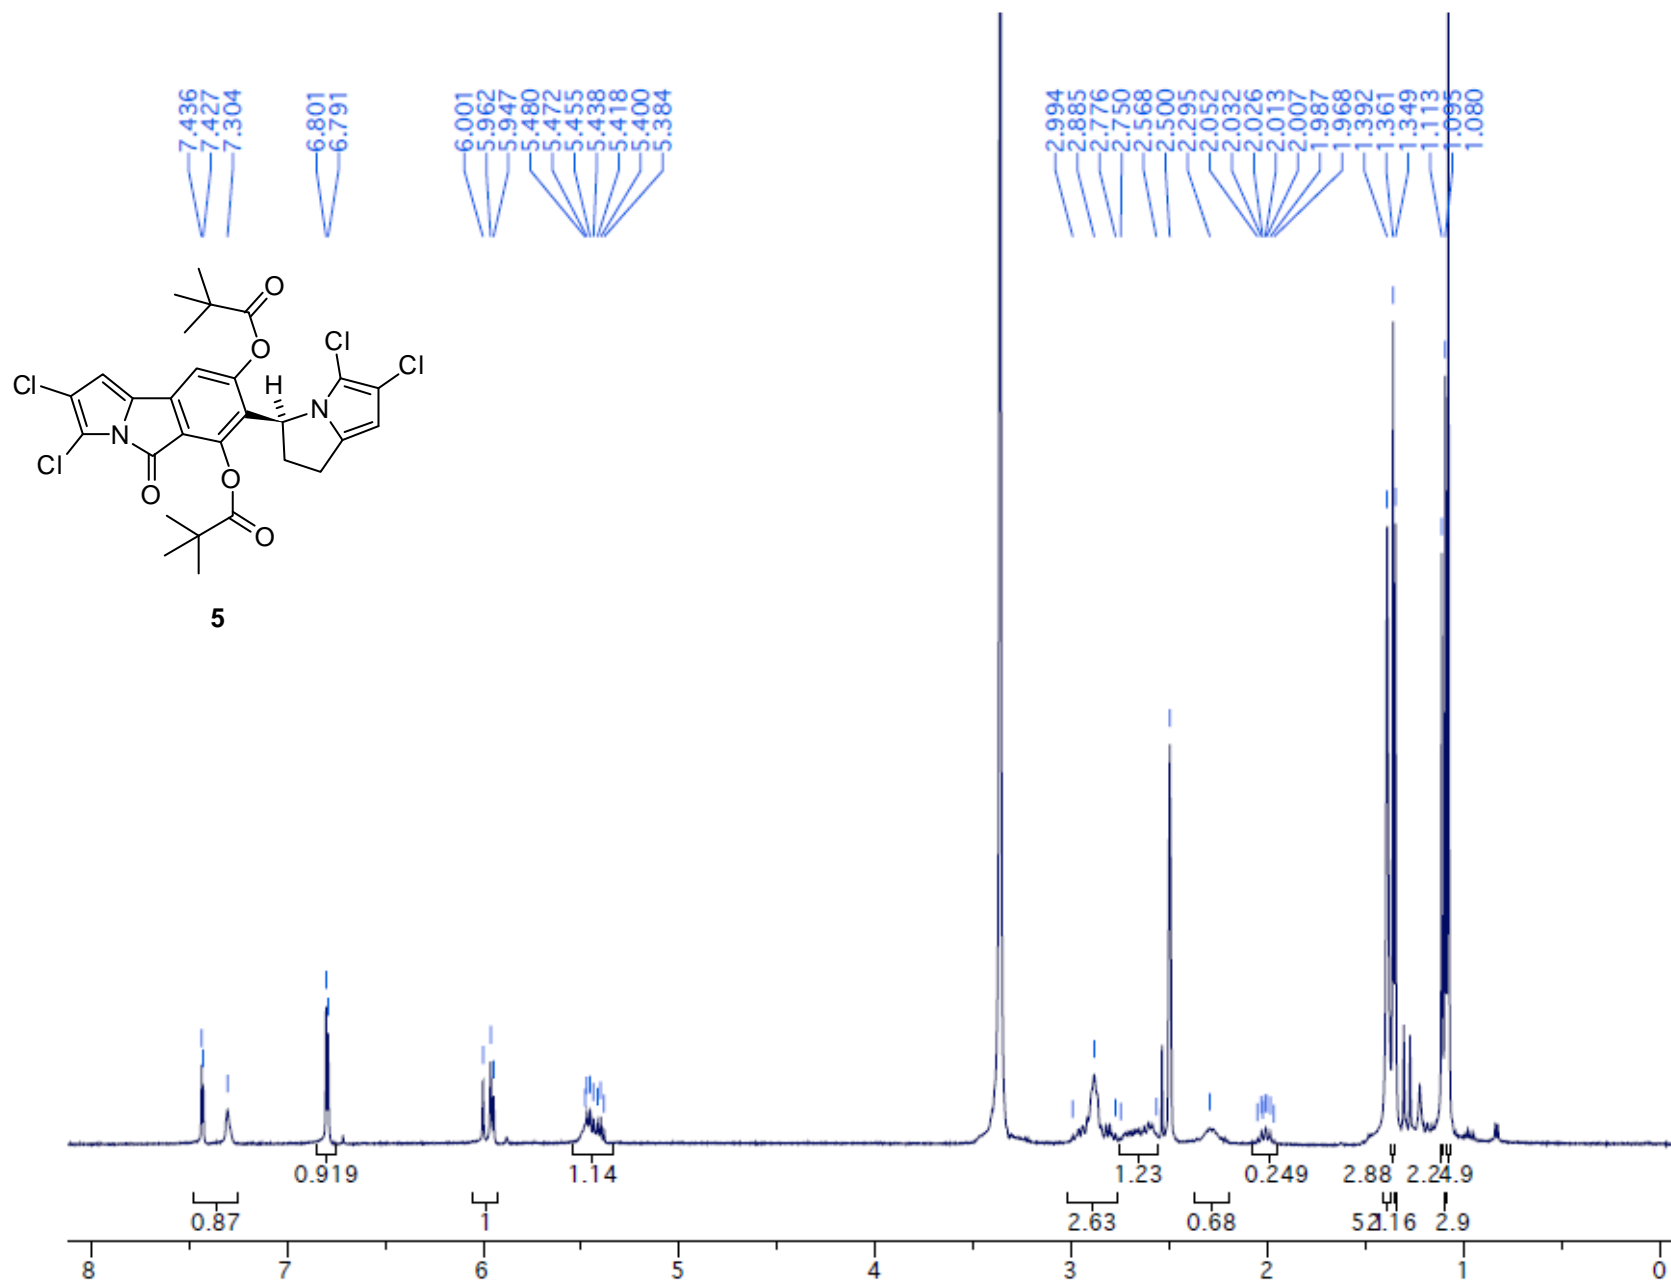

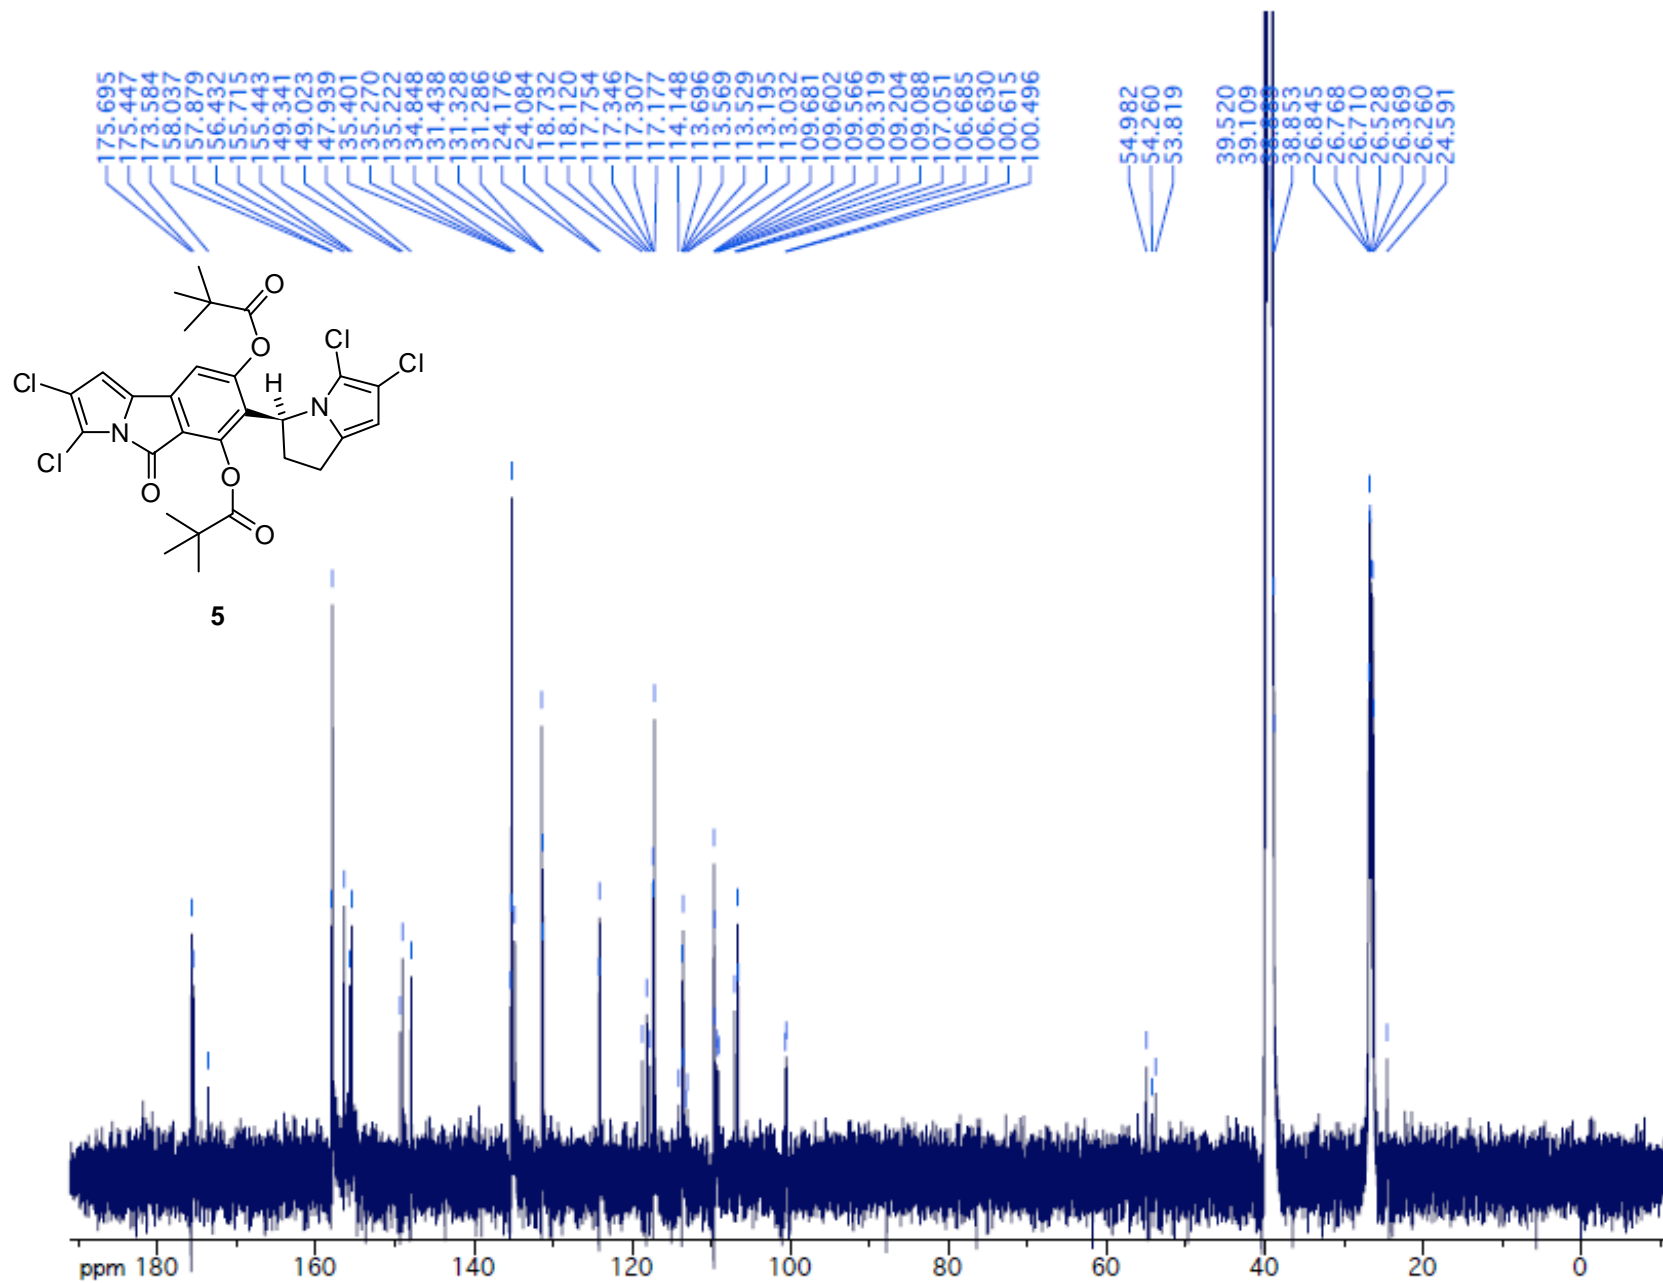

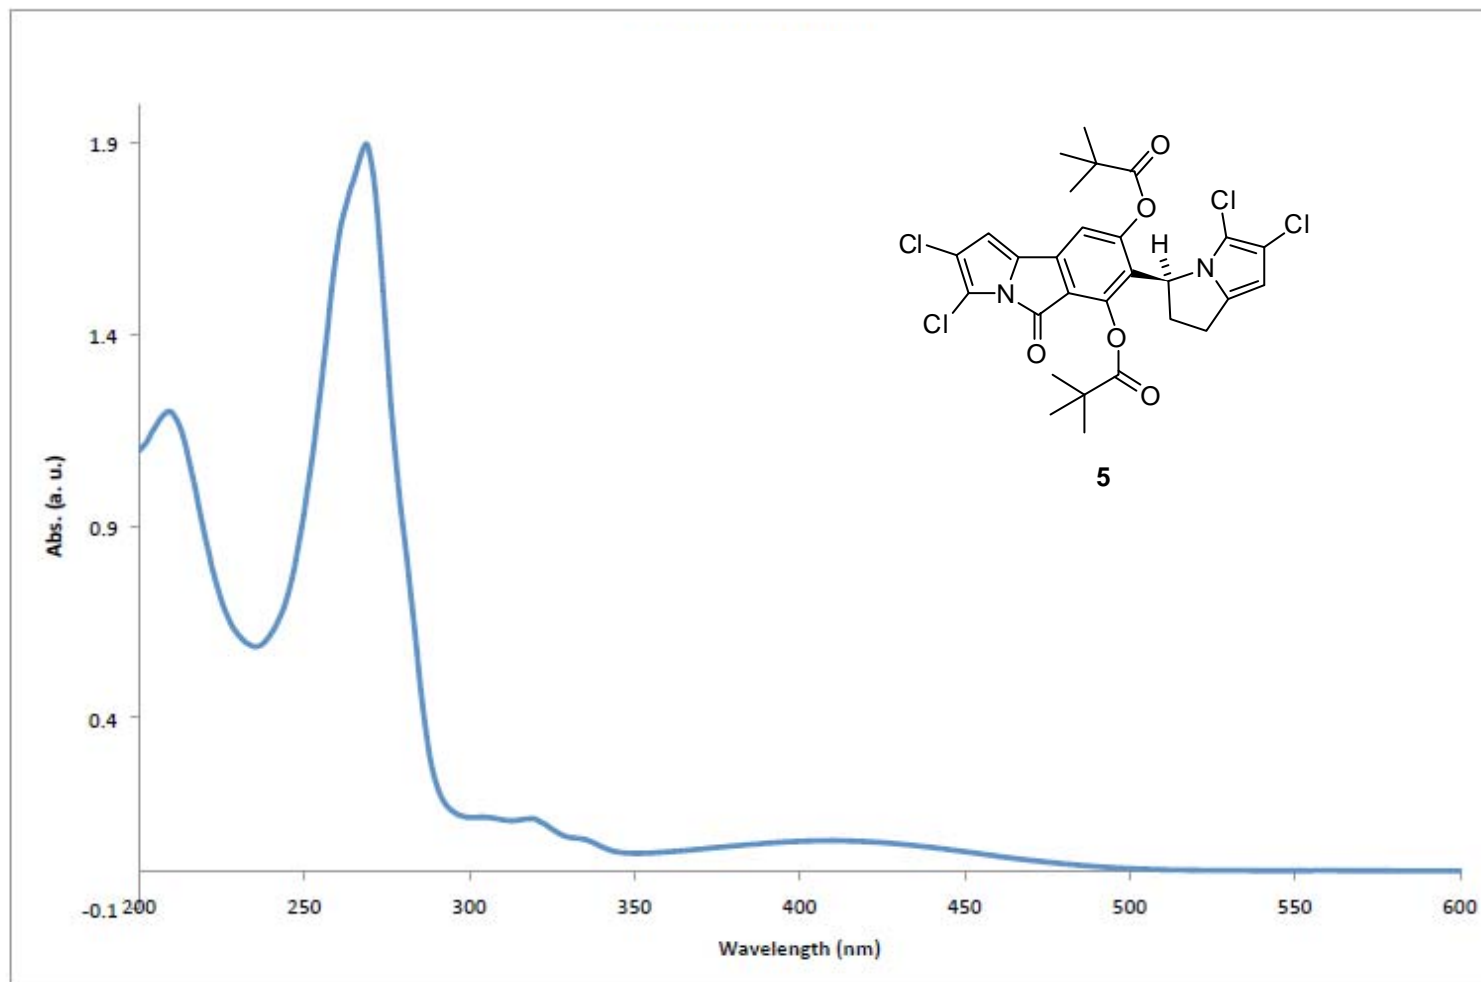

Pivaloyl-a #168-175 RT: 2.91-3.04 AV: 8 NL: 9.66E4  
T: FTMS + p ESI Full ms [100.00-2000.00]

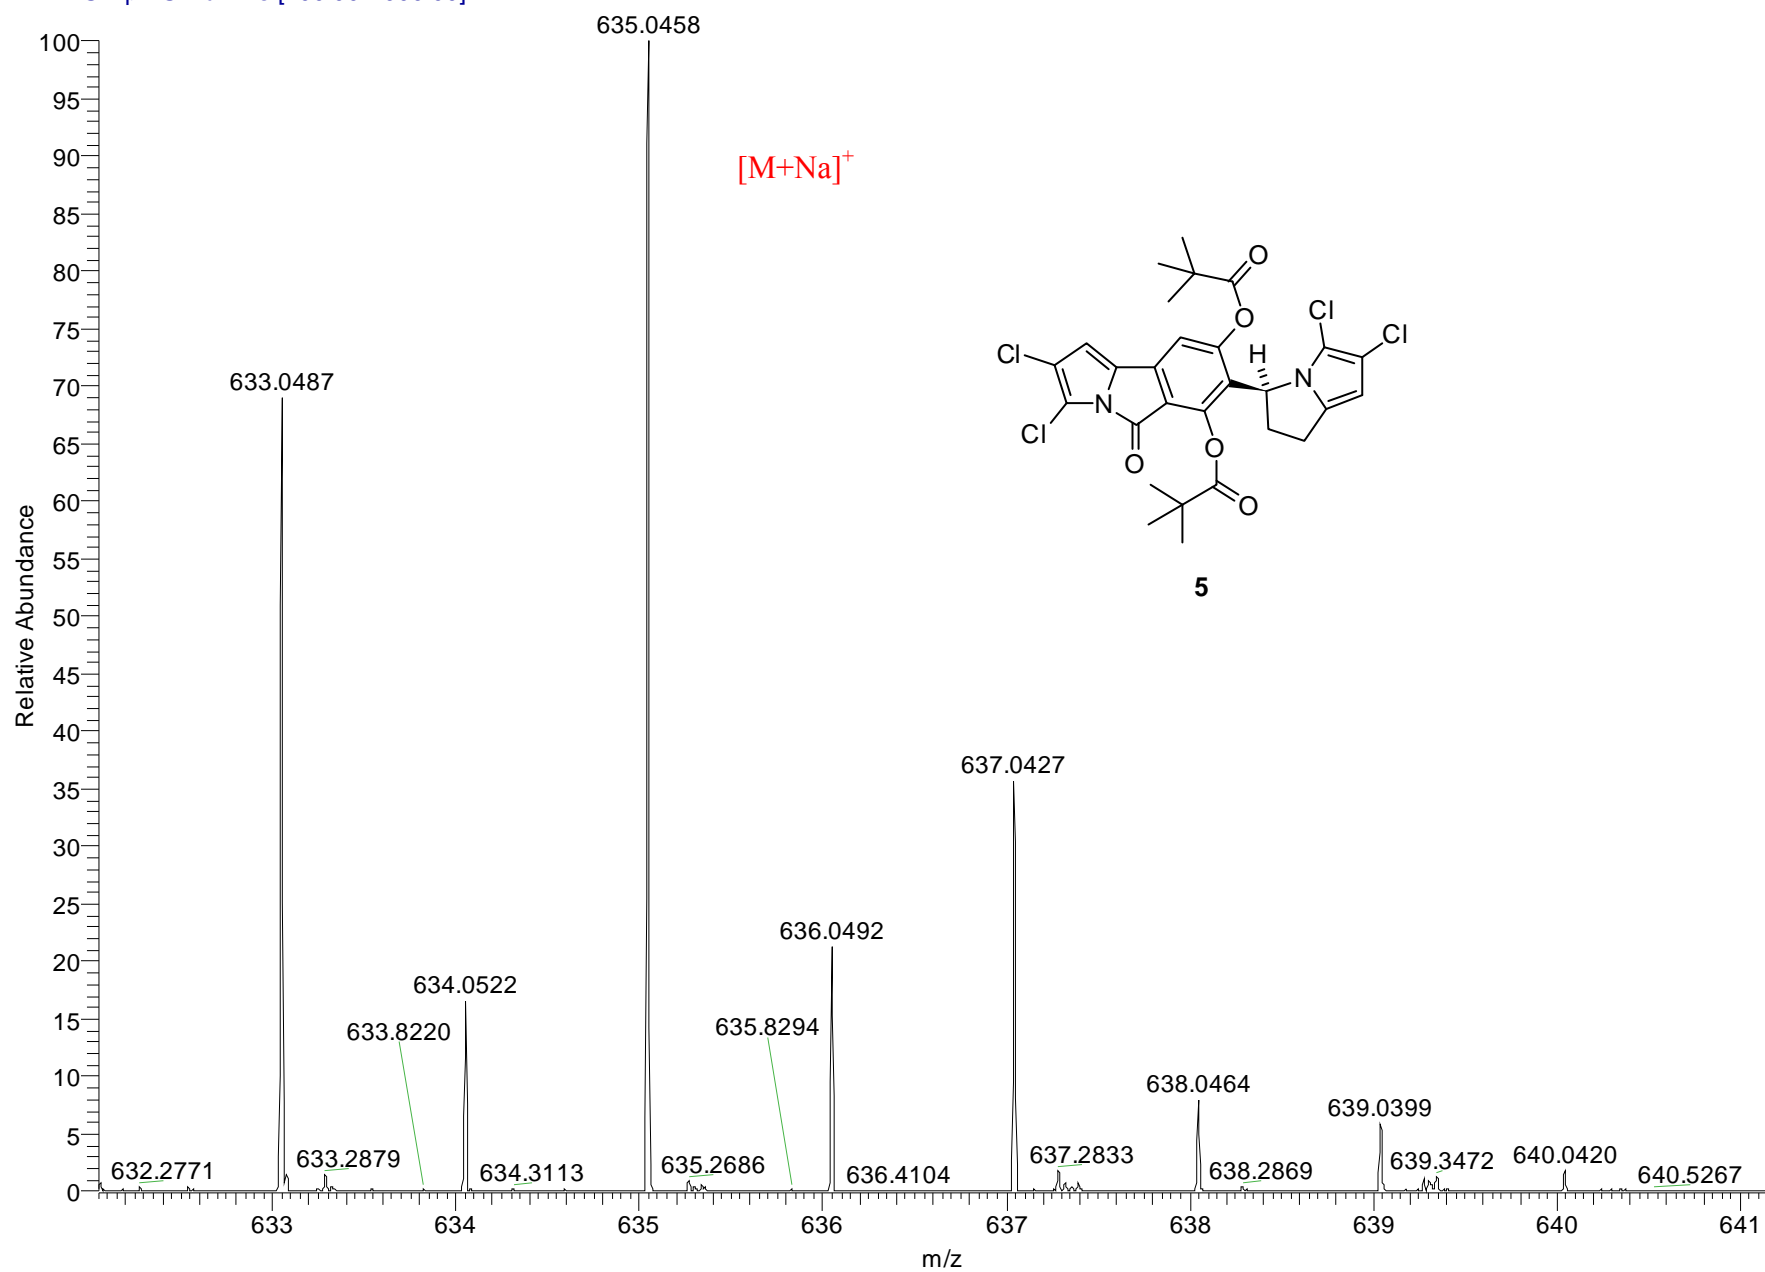

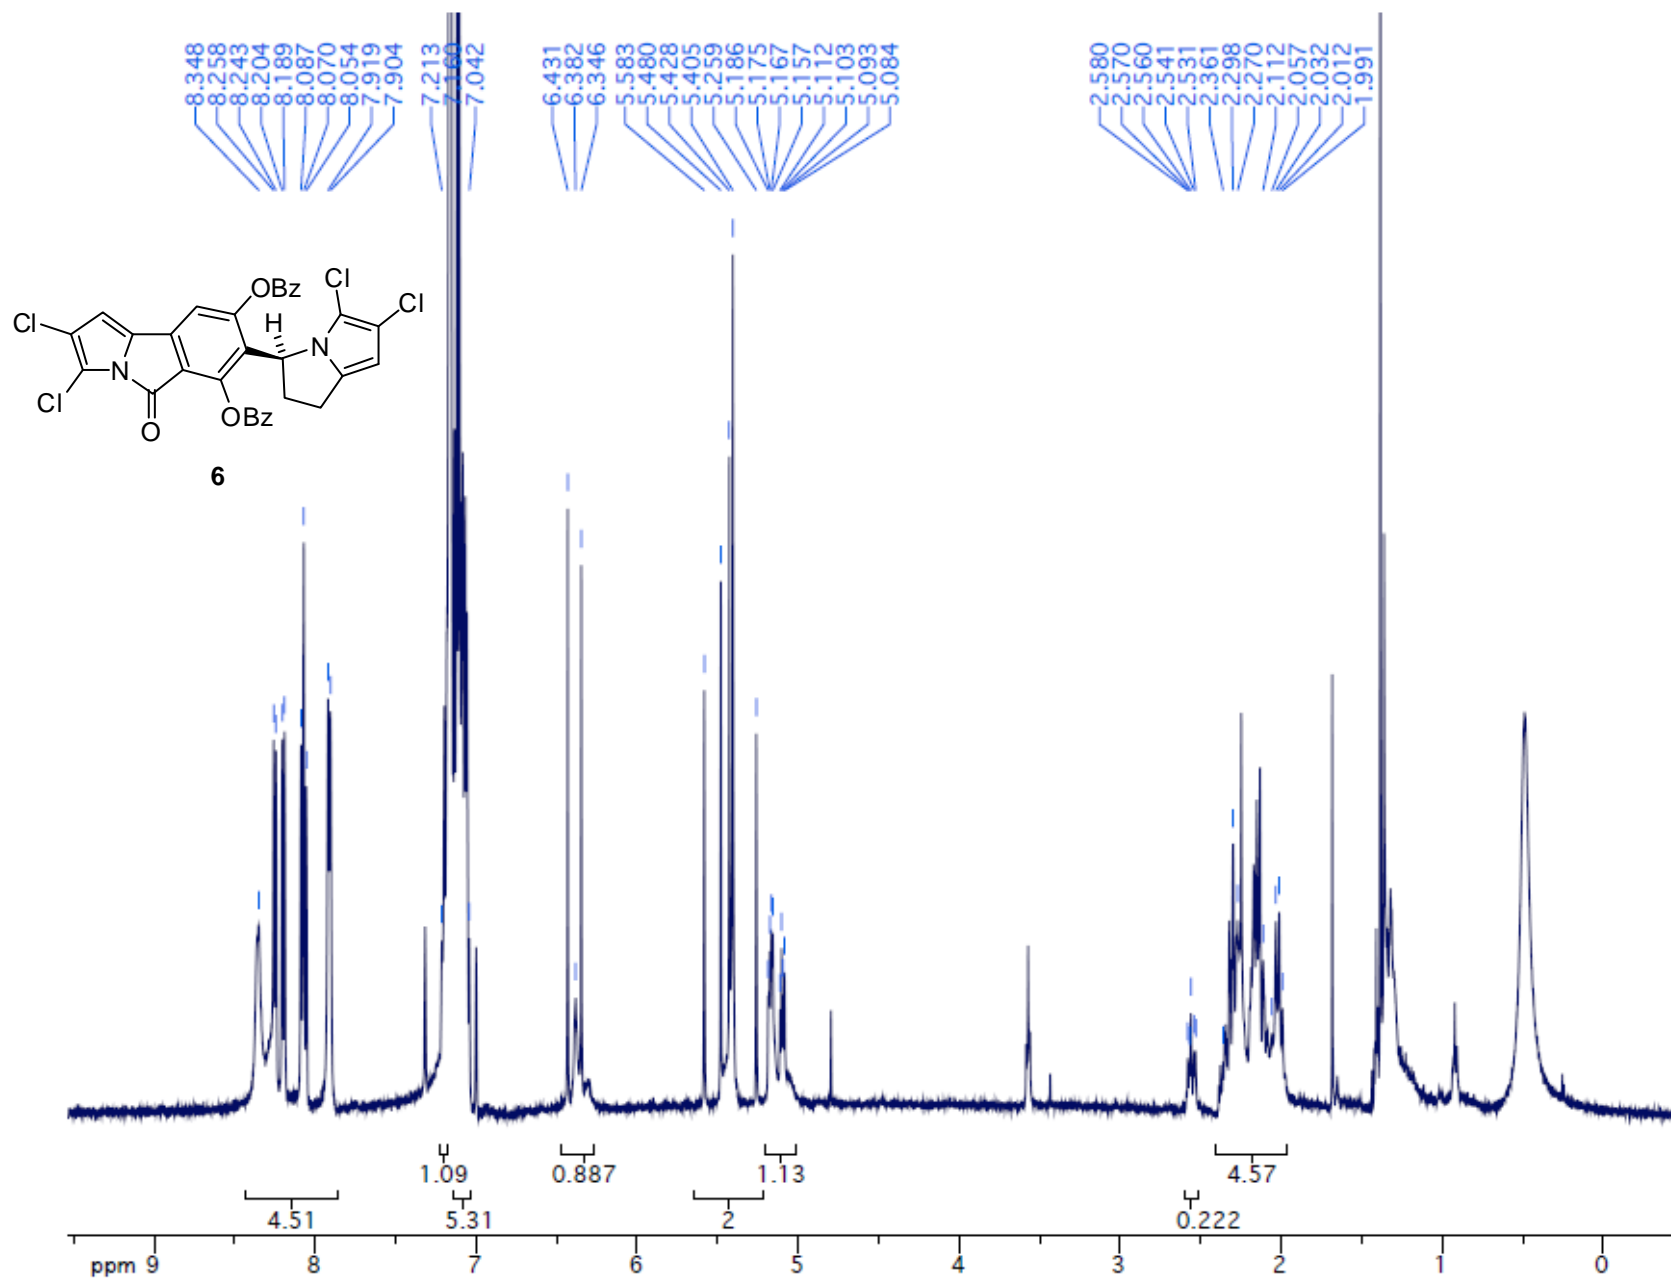

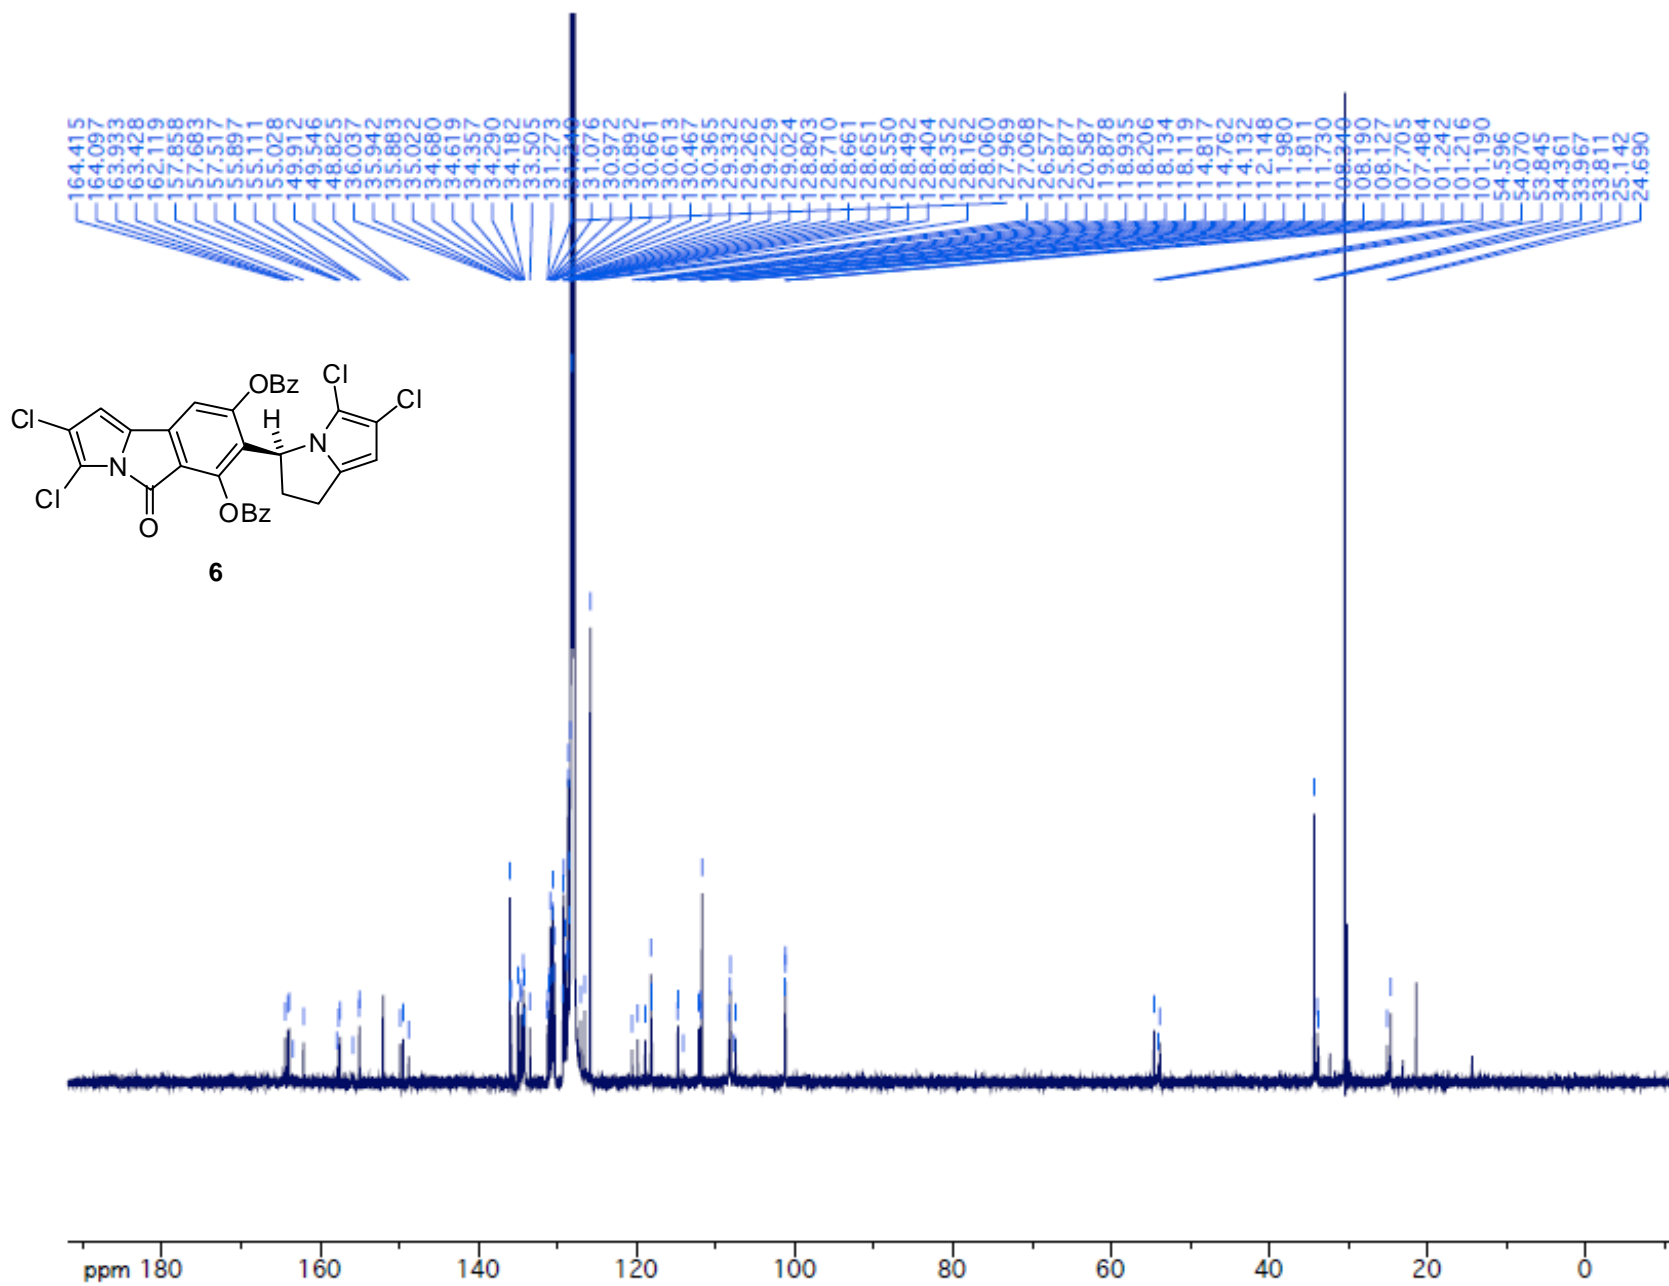



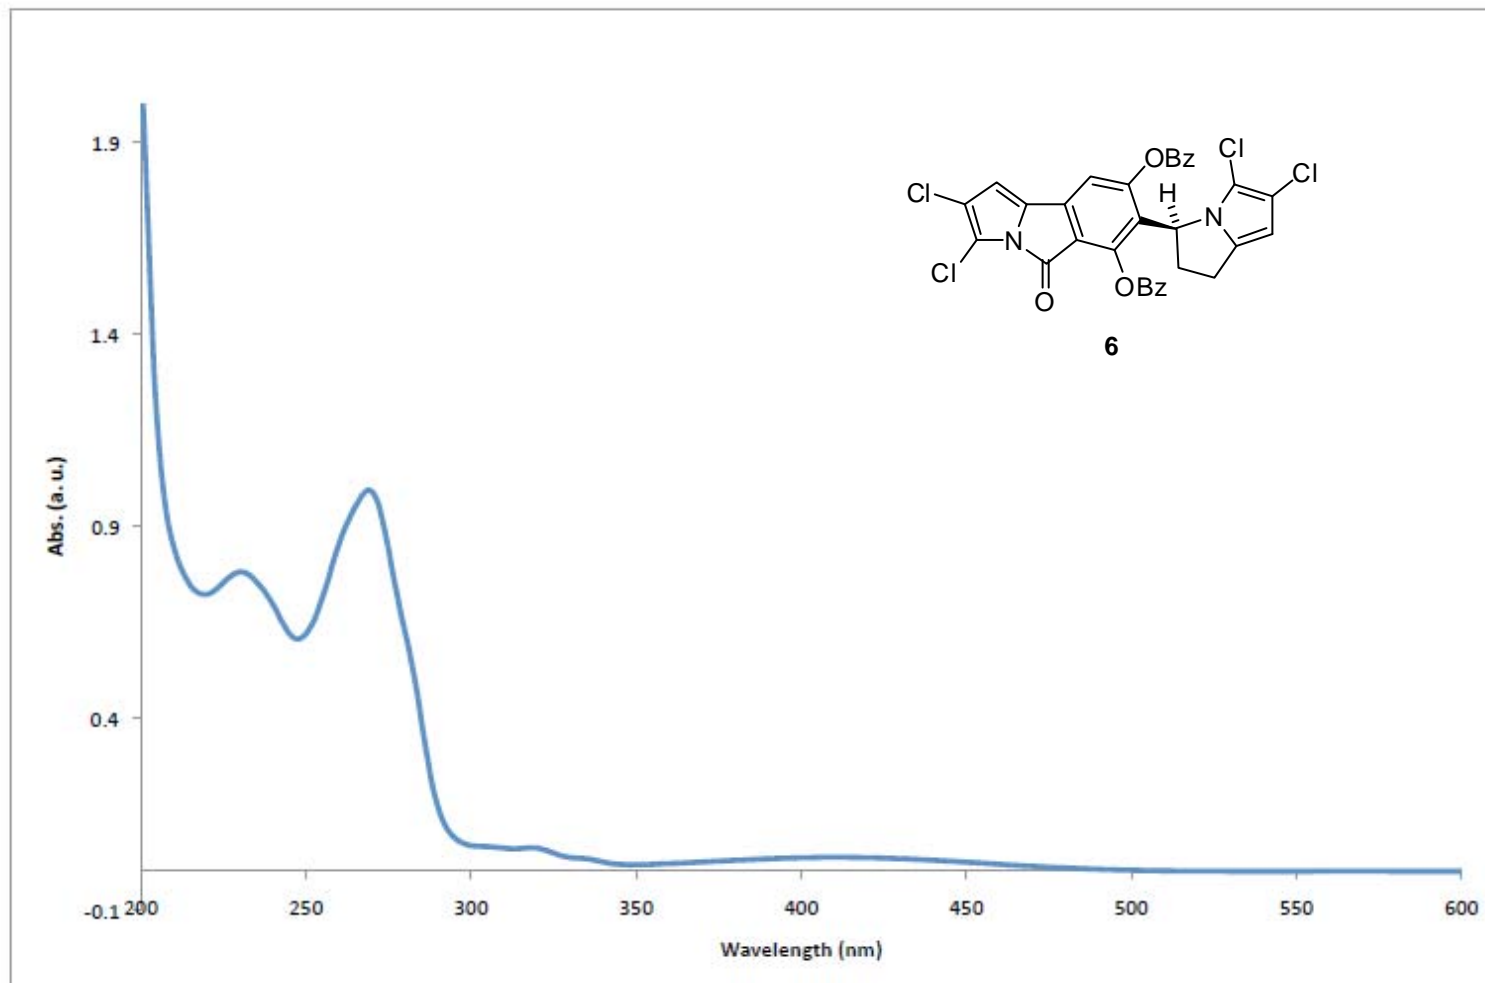

650-b #33-35 RT: 0.53-0.56 AV: 3 NL: 3.68E4  
T: FTMS + p ESI Full ms [100.00-2000.00]

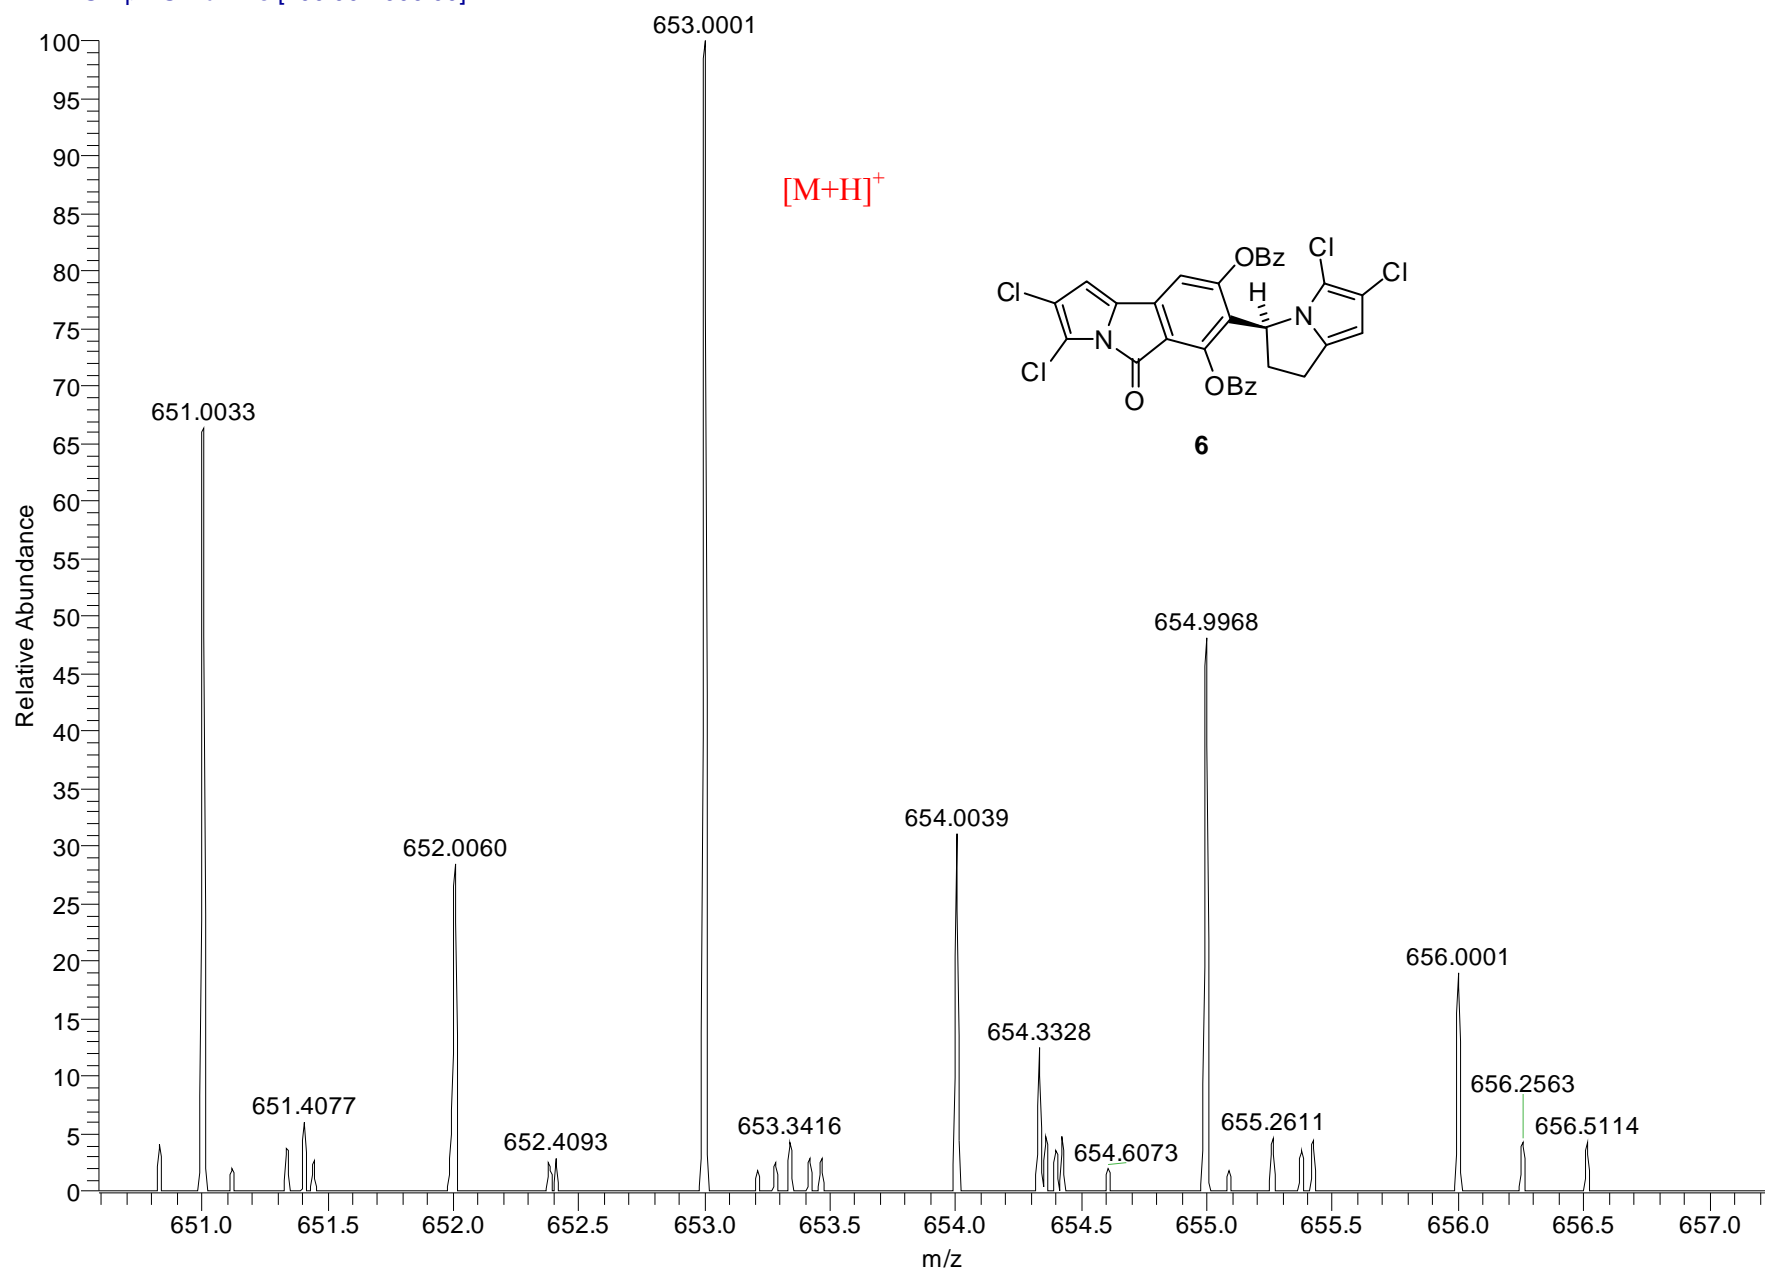

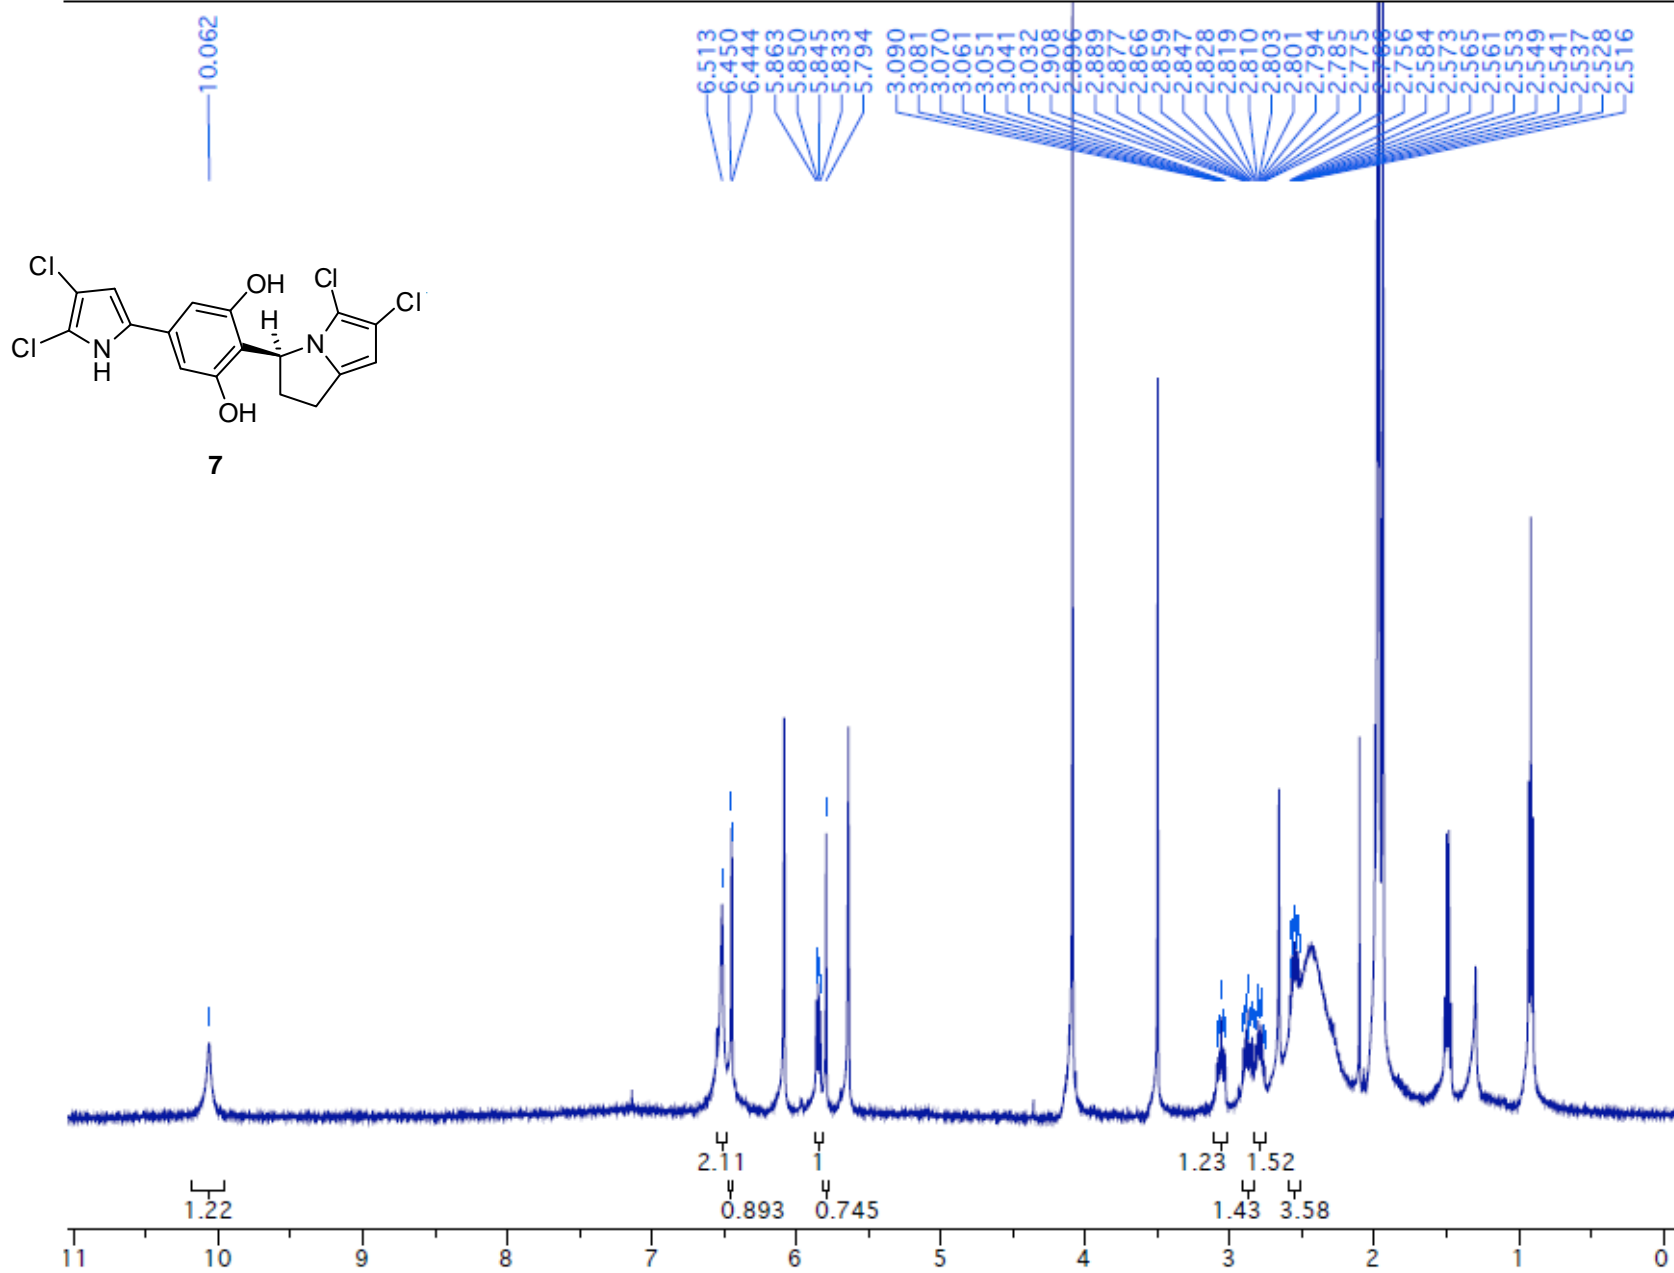

HRESI-FT-MS (Orbit-Trap-MS) of chlorizidine B (7)

H287416 #316 RT: 5.61 AV: 1 SB: 4 3.37-3.41 NL: 4.08E4  
T: FTMS + p ESI Full ms [100.00-2000.00]

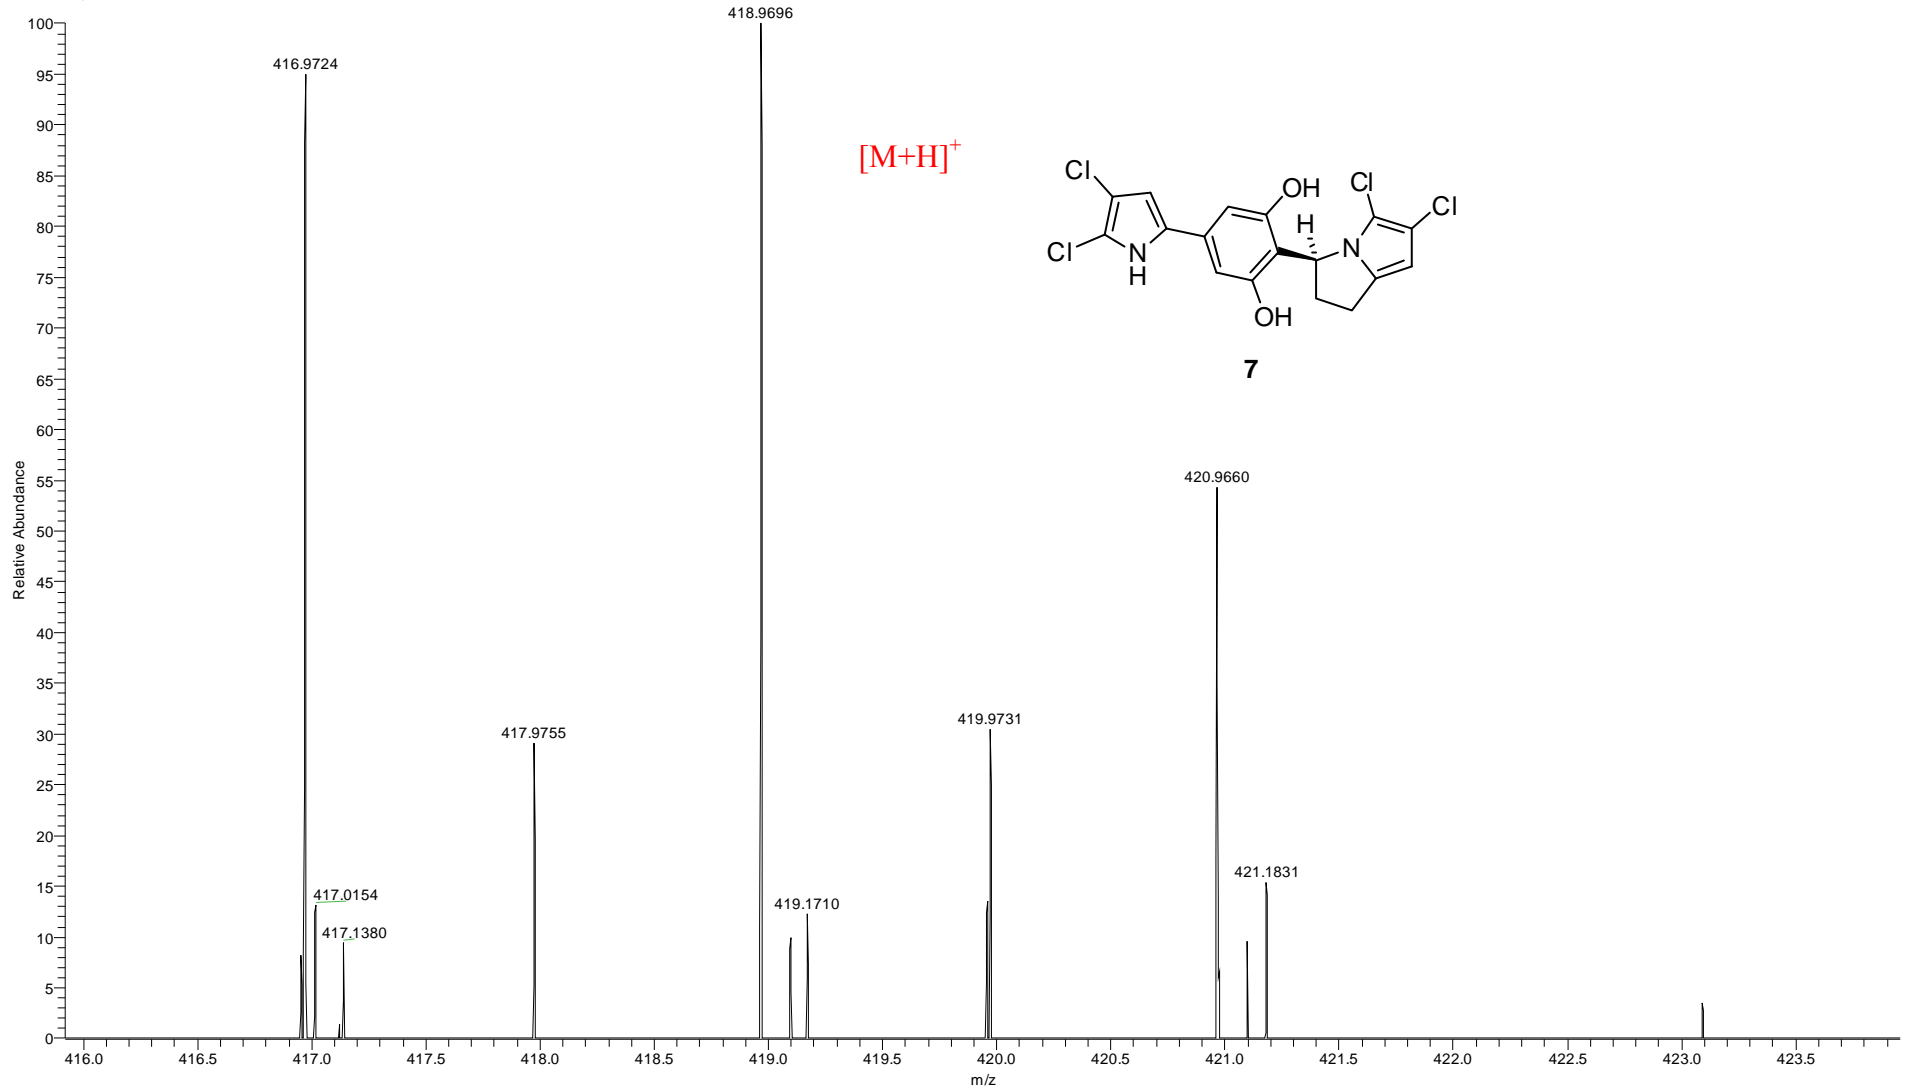

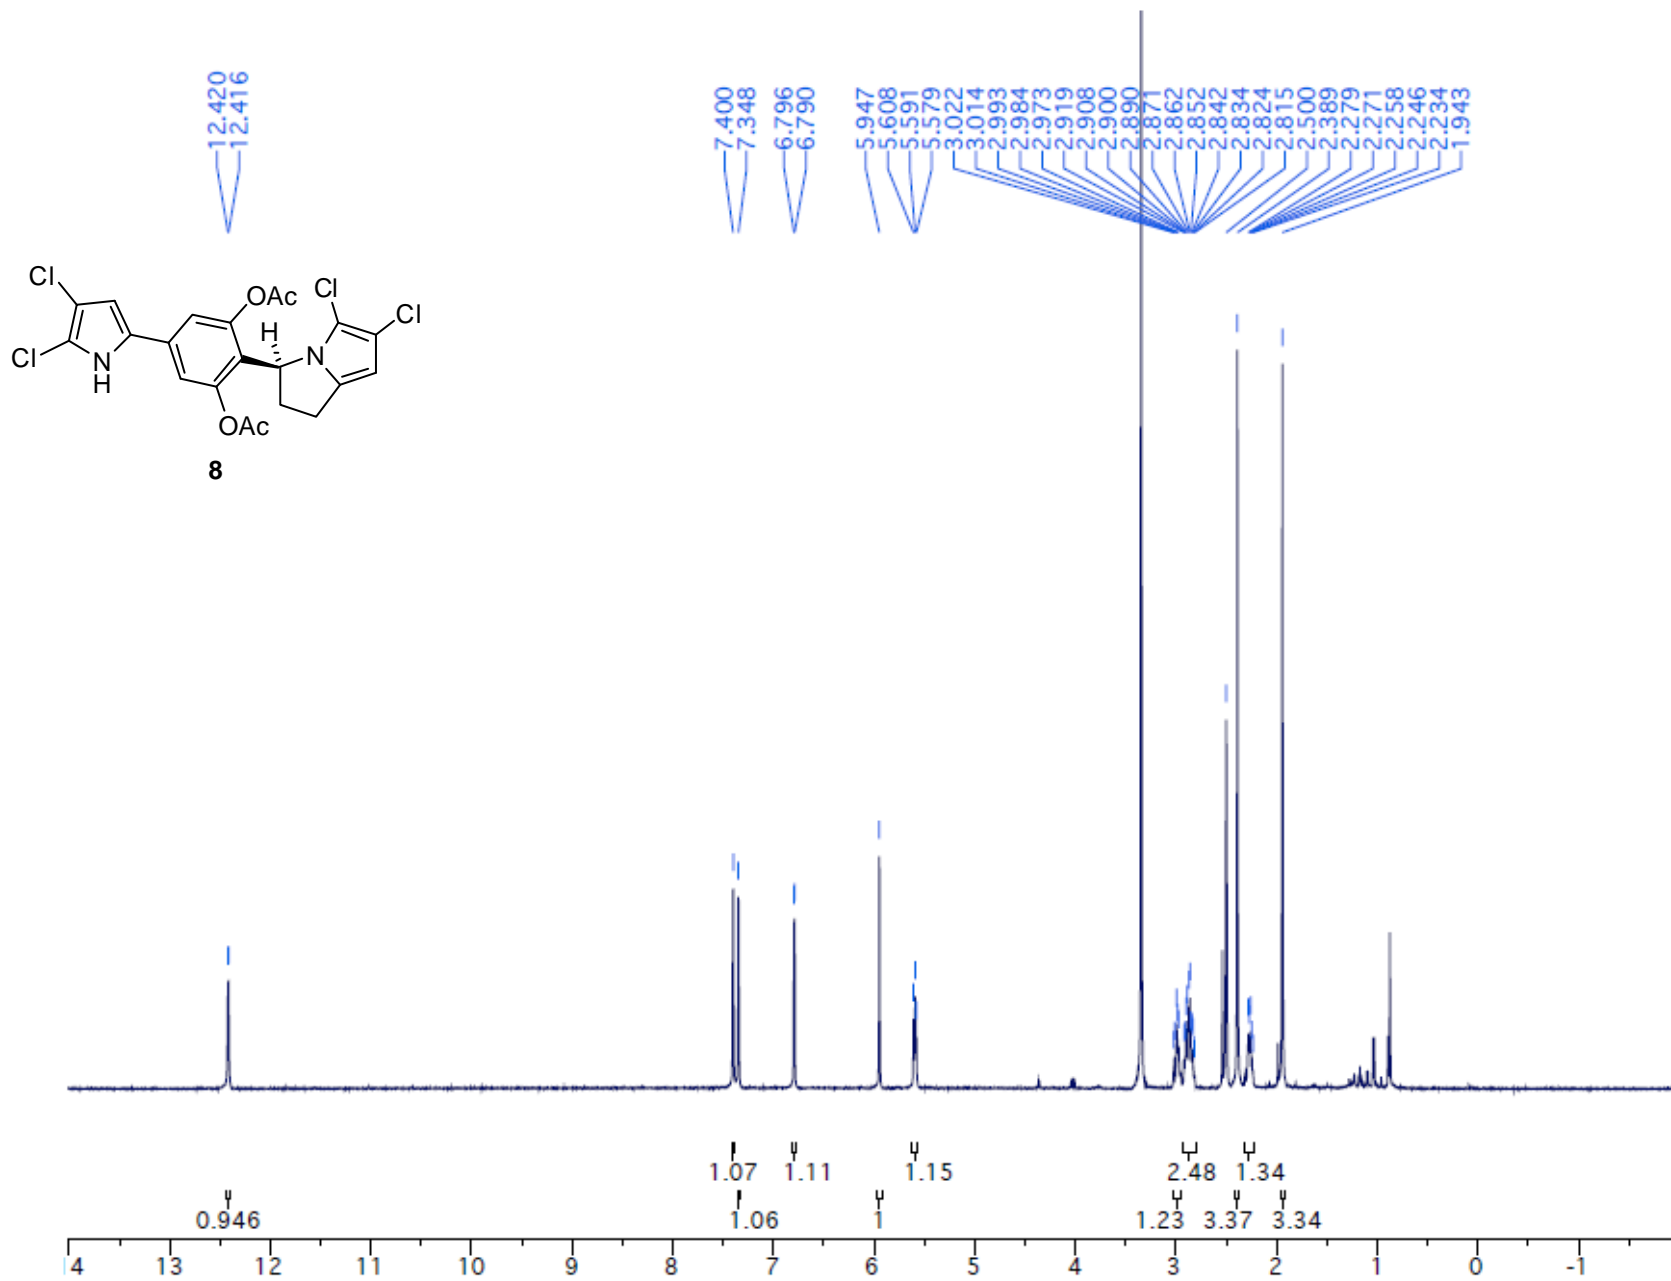

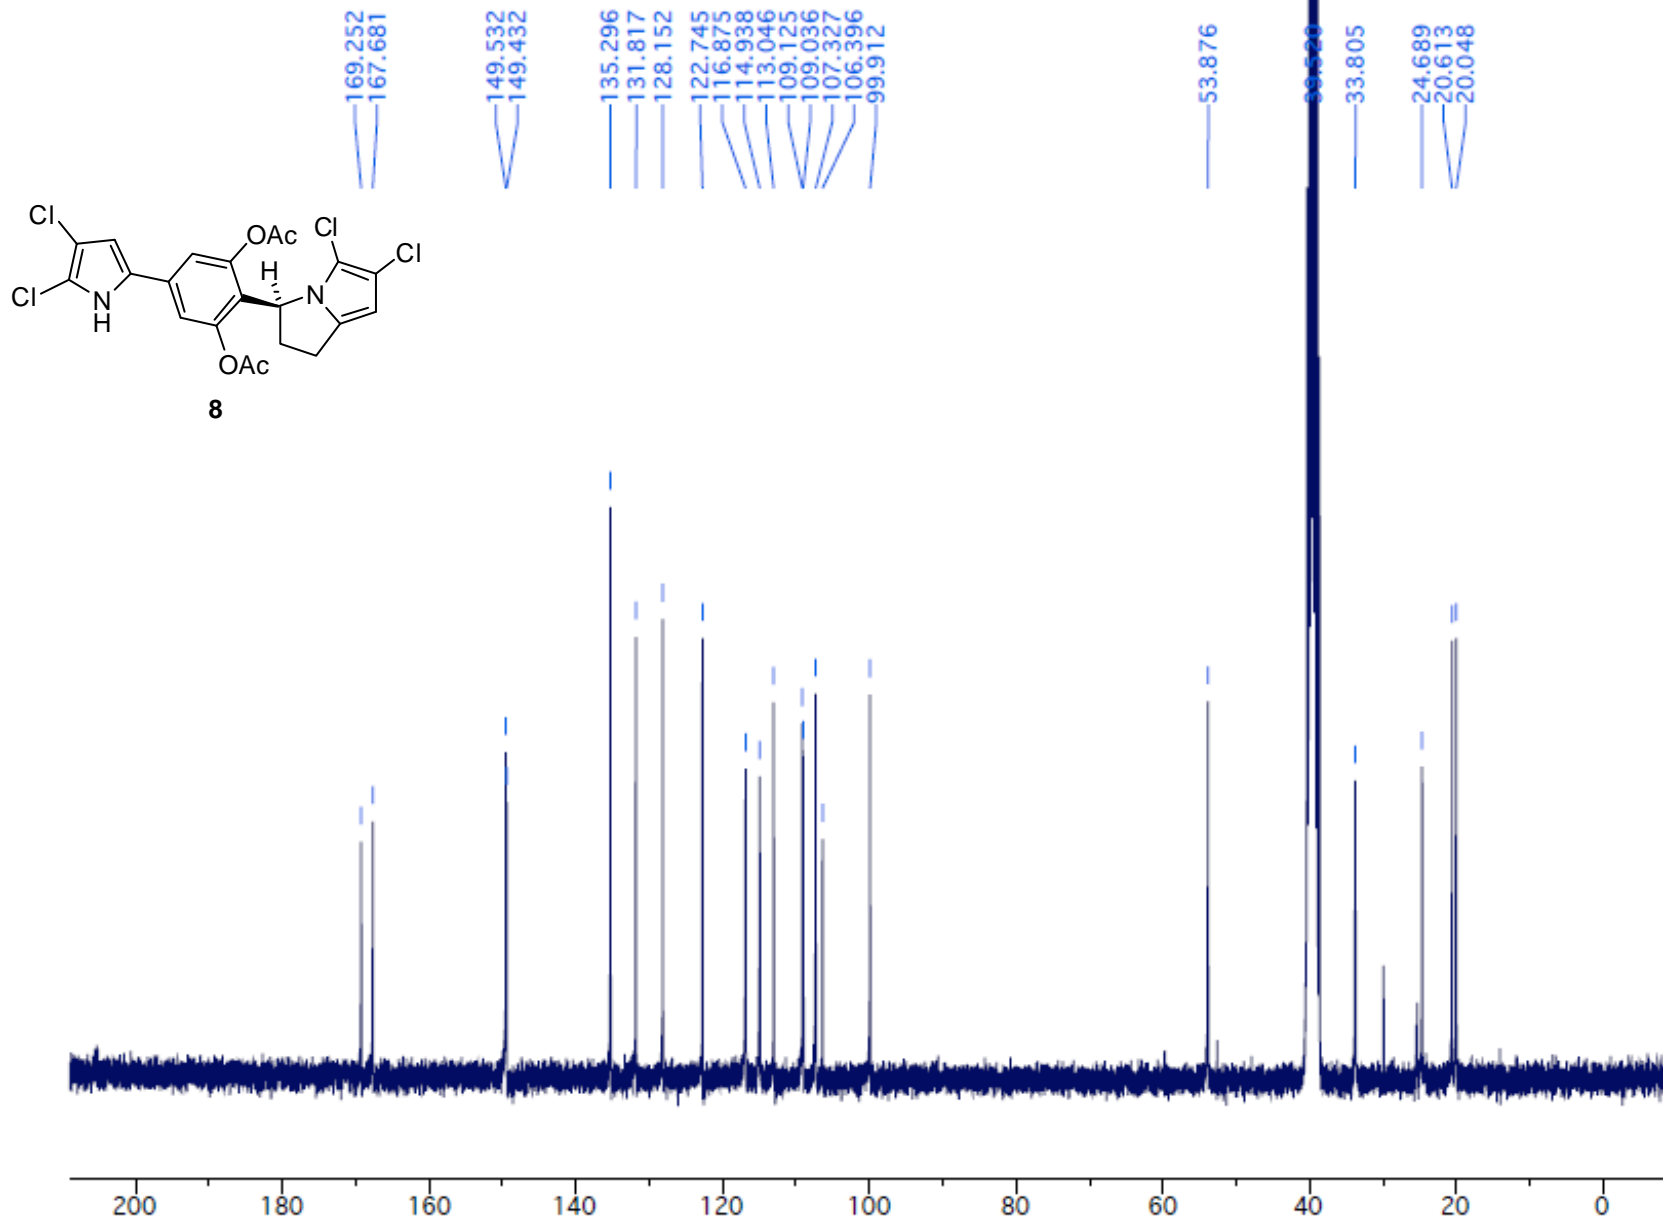

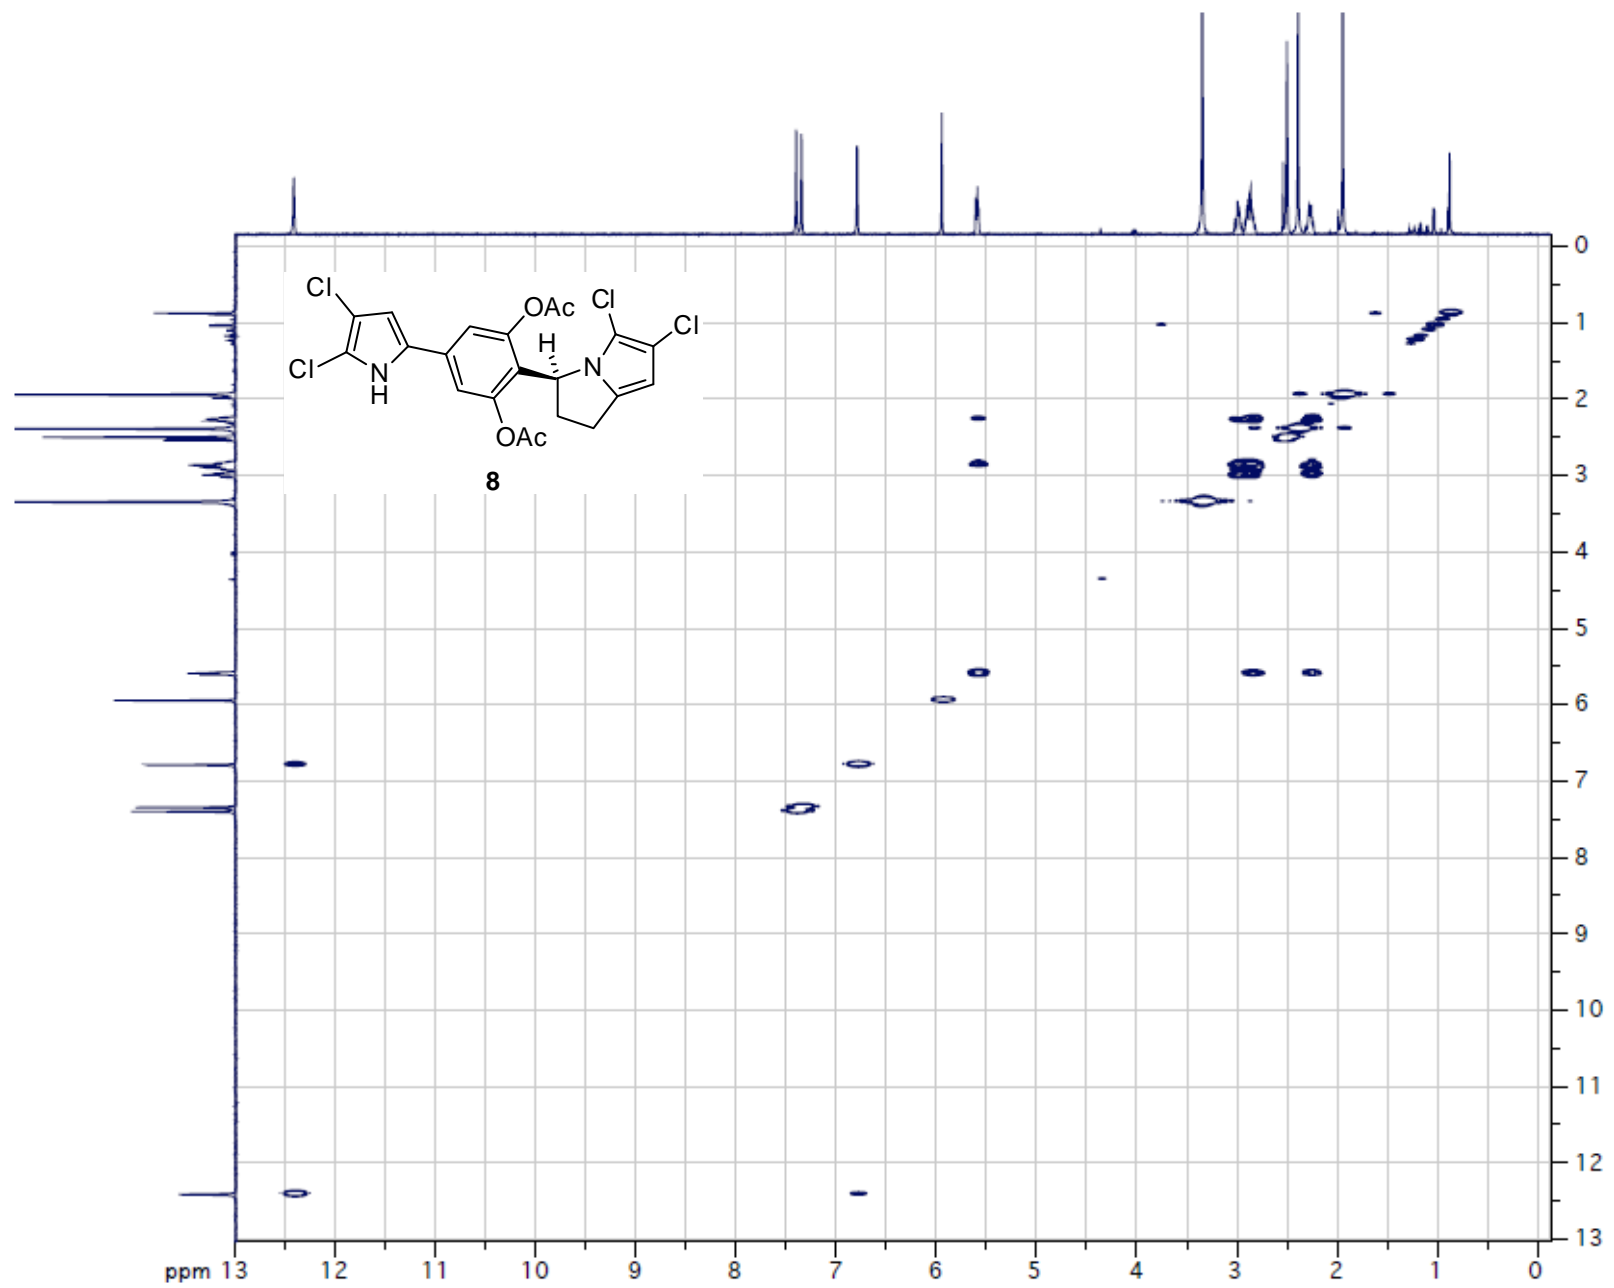

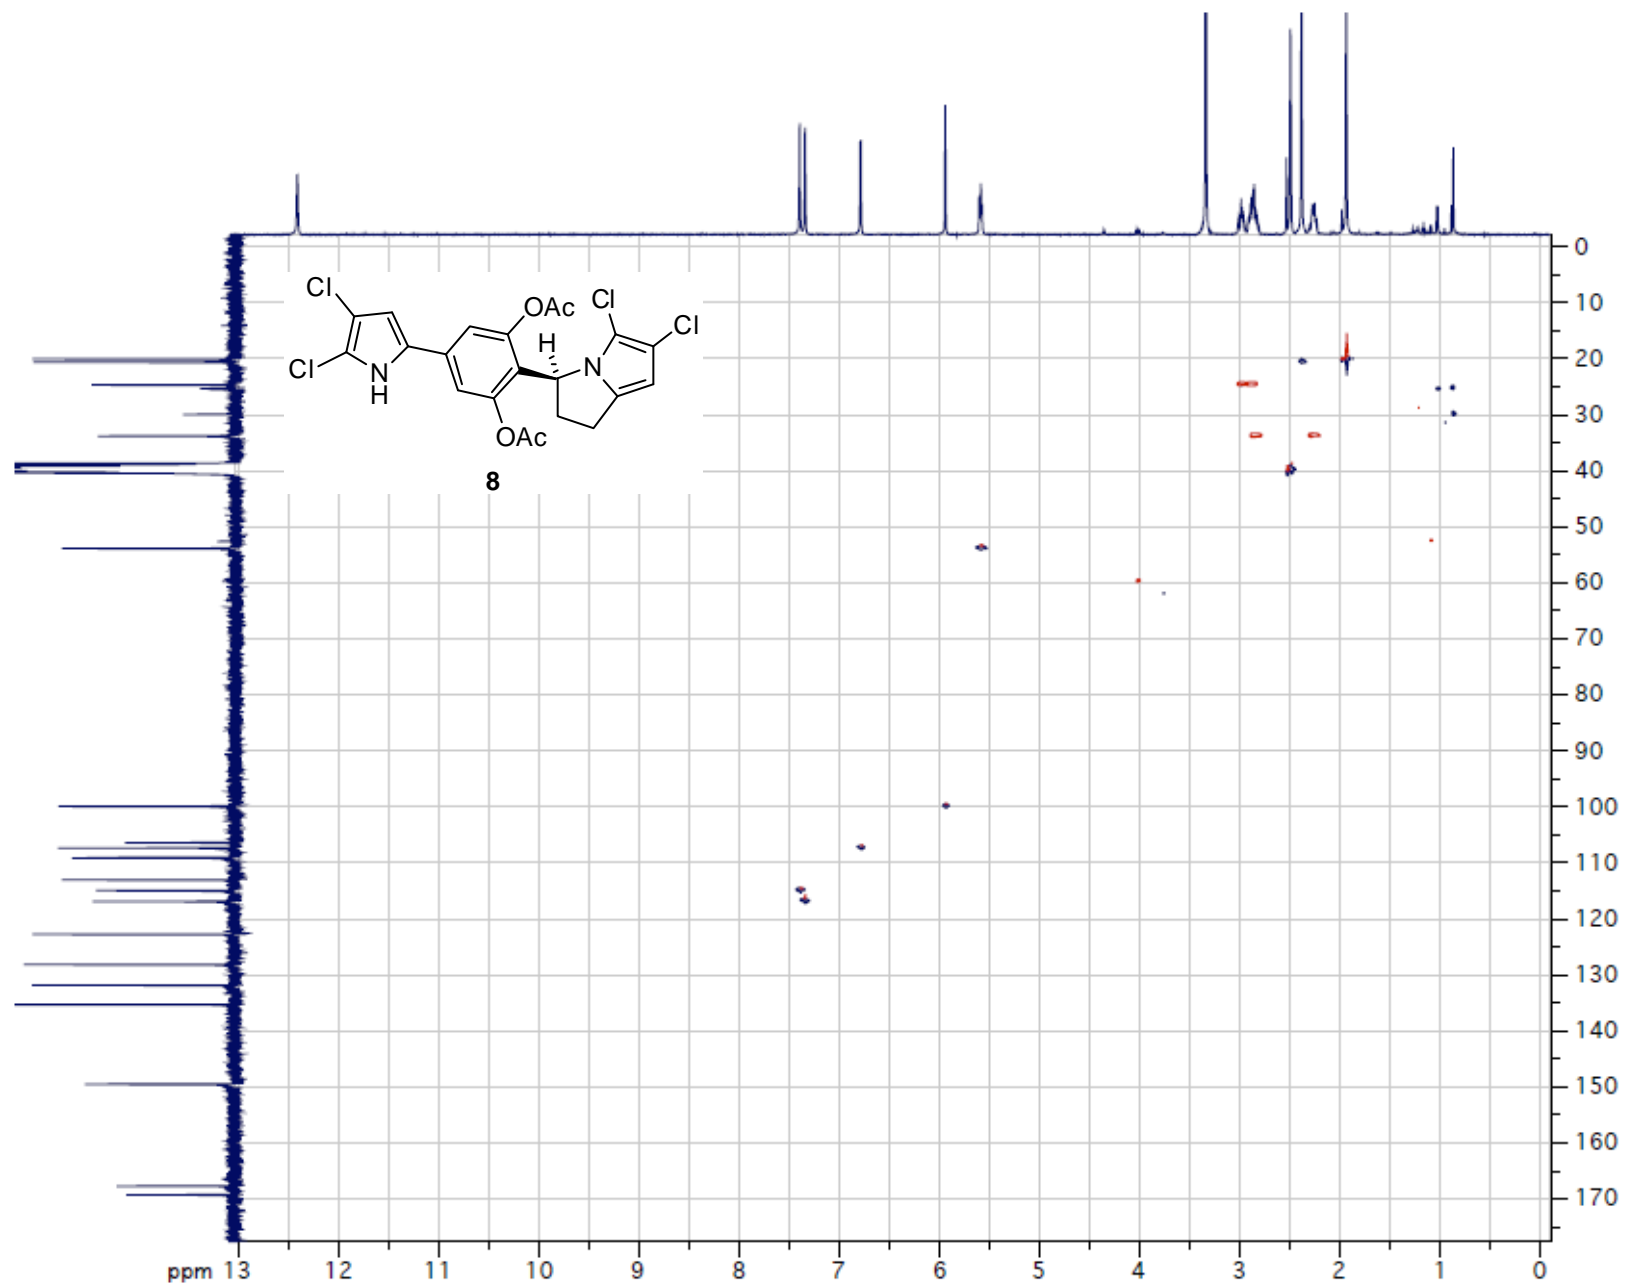



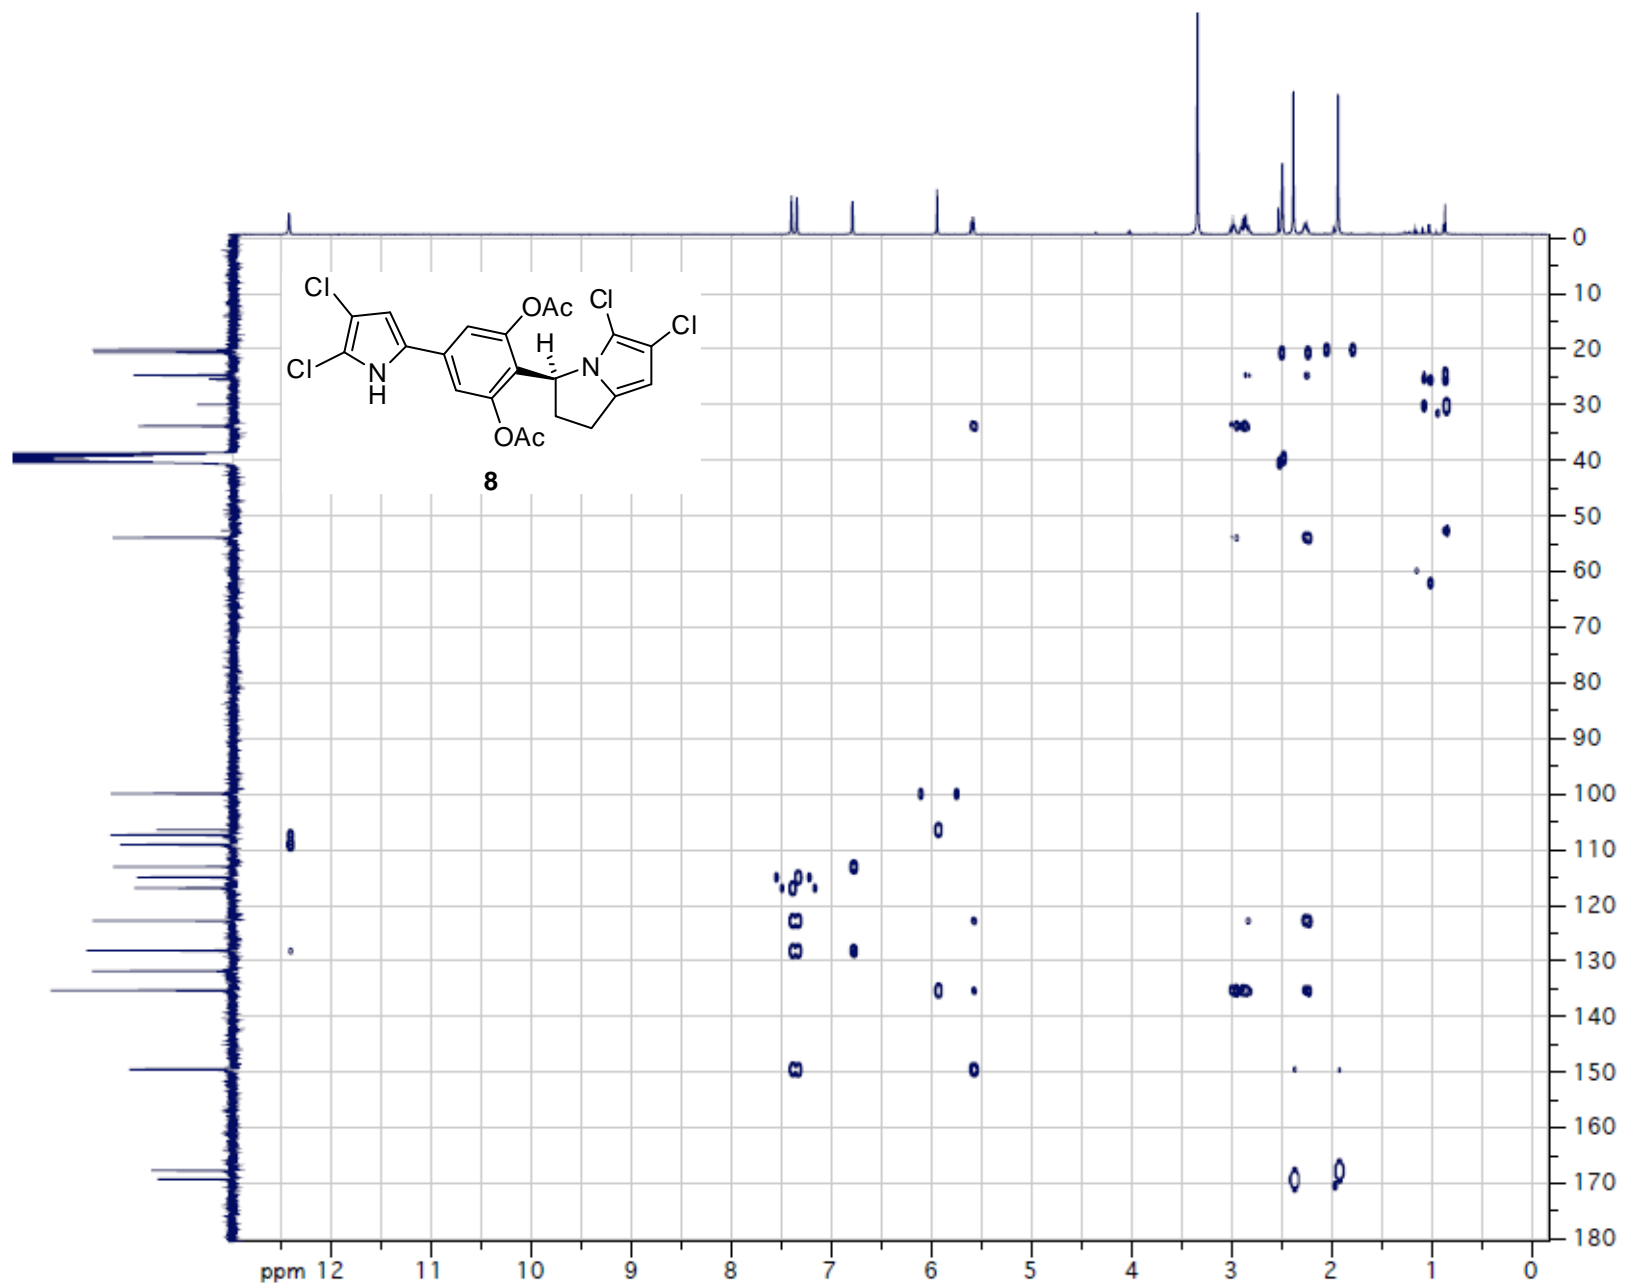

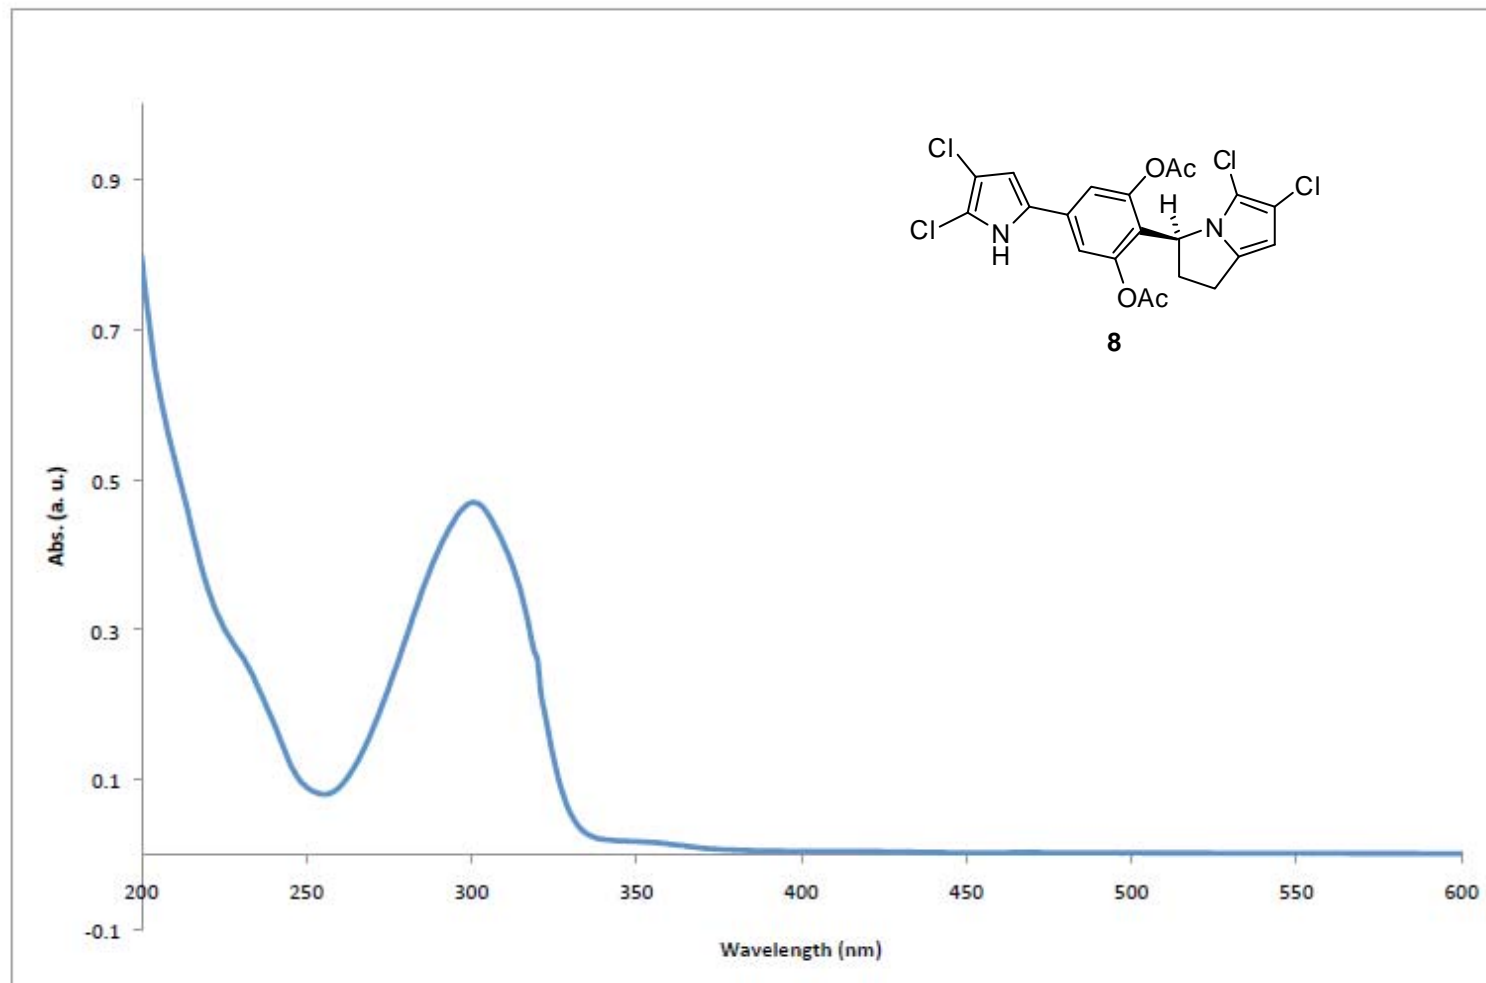

500 #98 RT: 1.57 AV: 1 NL: 3.62E5  
T: FTMS + p ESI Full ms [100.00-2000.00]

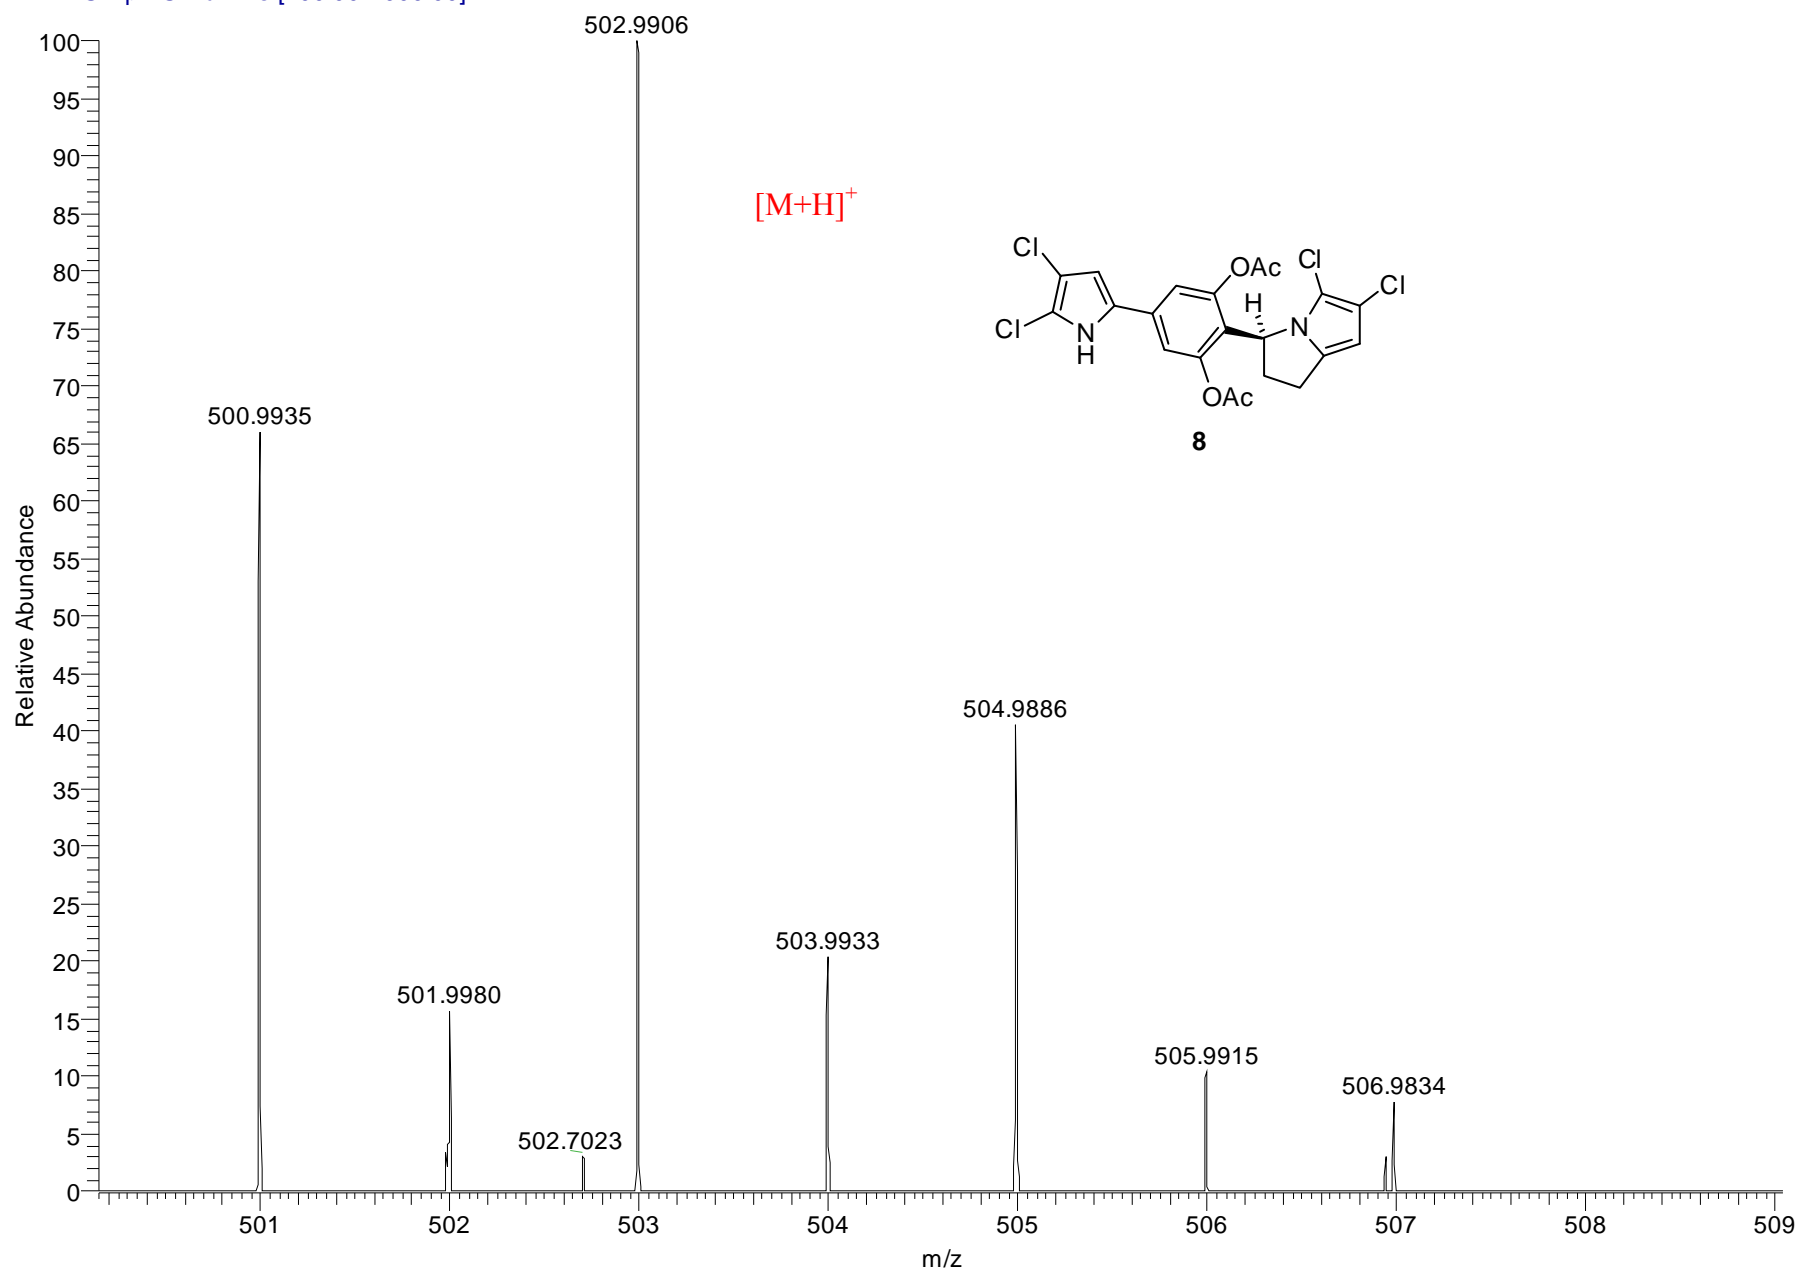

<sup>1</sup>H NMR (600 MHz, CD<sub>3</sub>CN) of thioester **9**

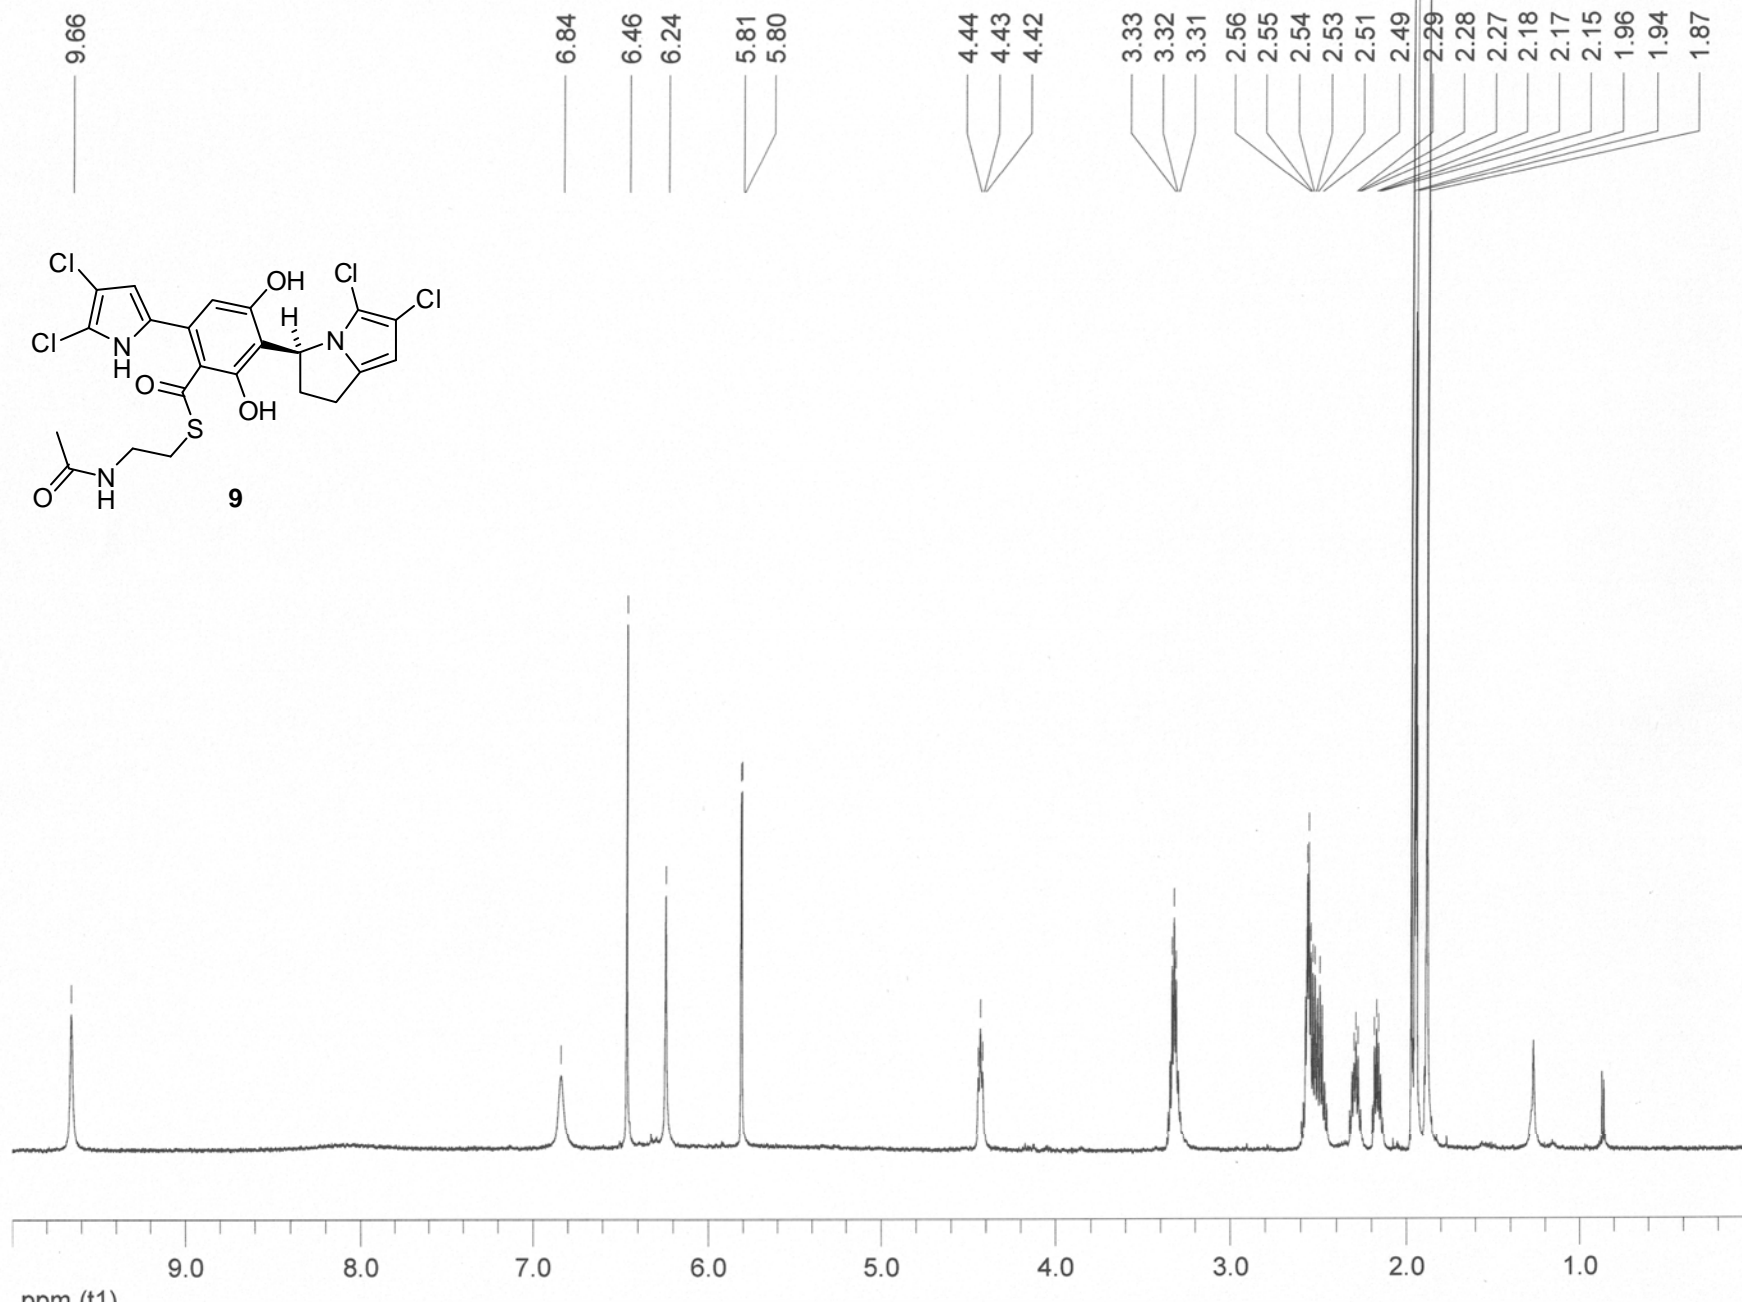

COSY (600 MHz, CD<sub>3</sub>CN) of thioester **9**

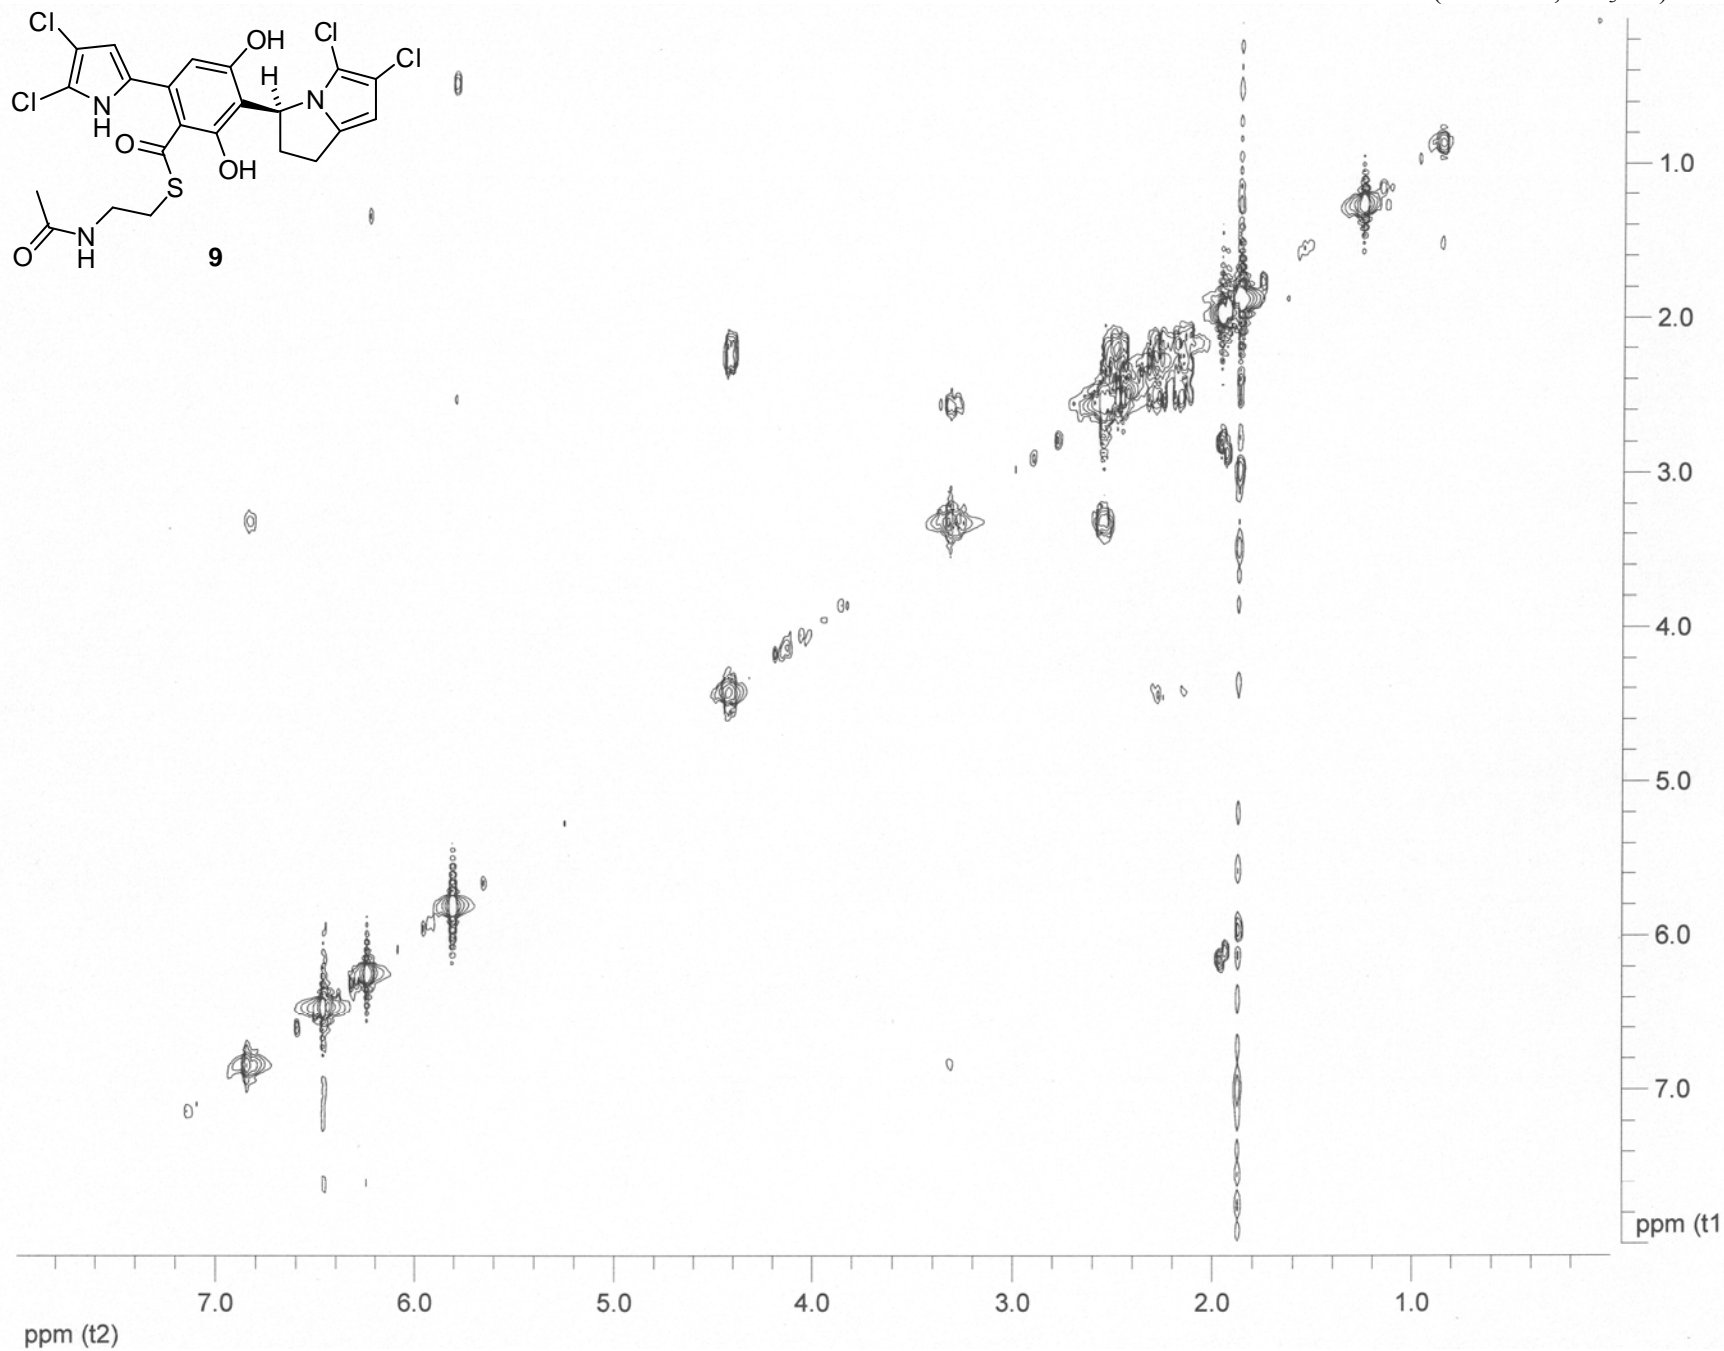

HSQC (600 MHz, CD<sub>3</sub>CN) of thioester **9**

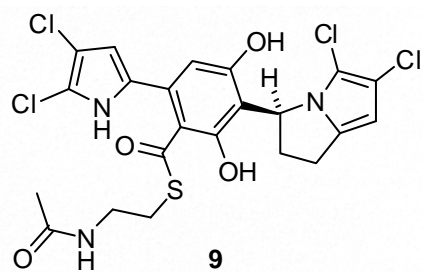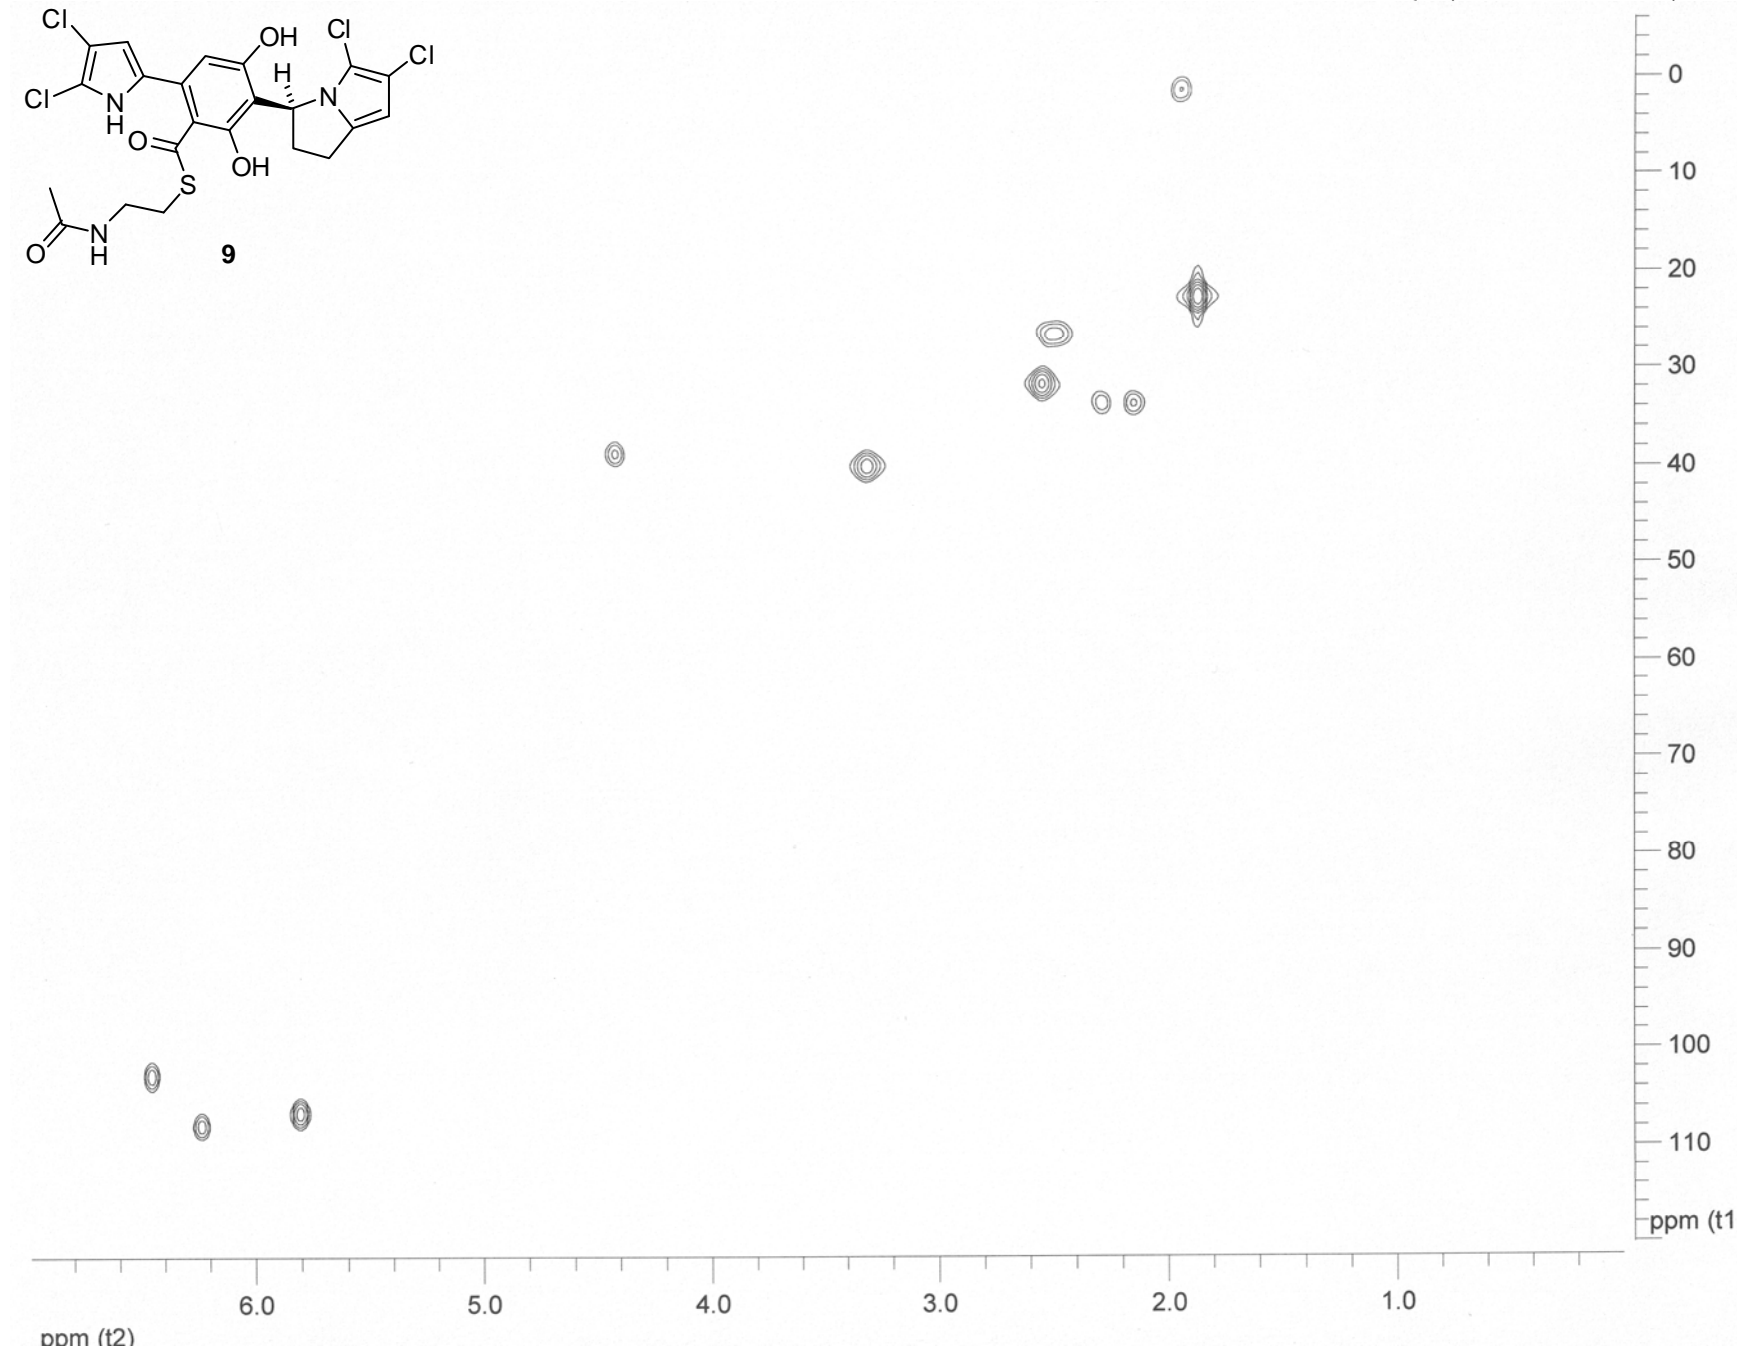

HMBC (600 MHz, CD<sub>3</sub>CN) of thioester **9**

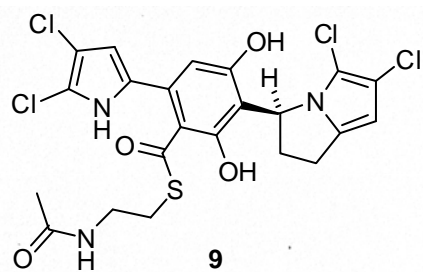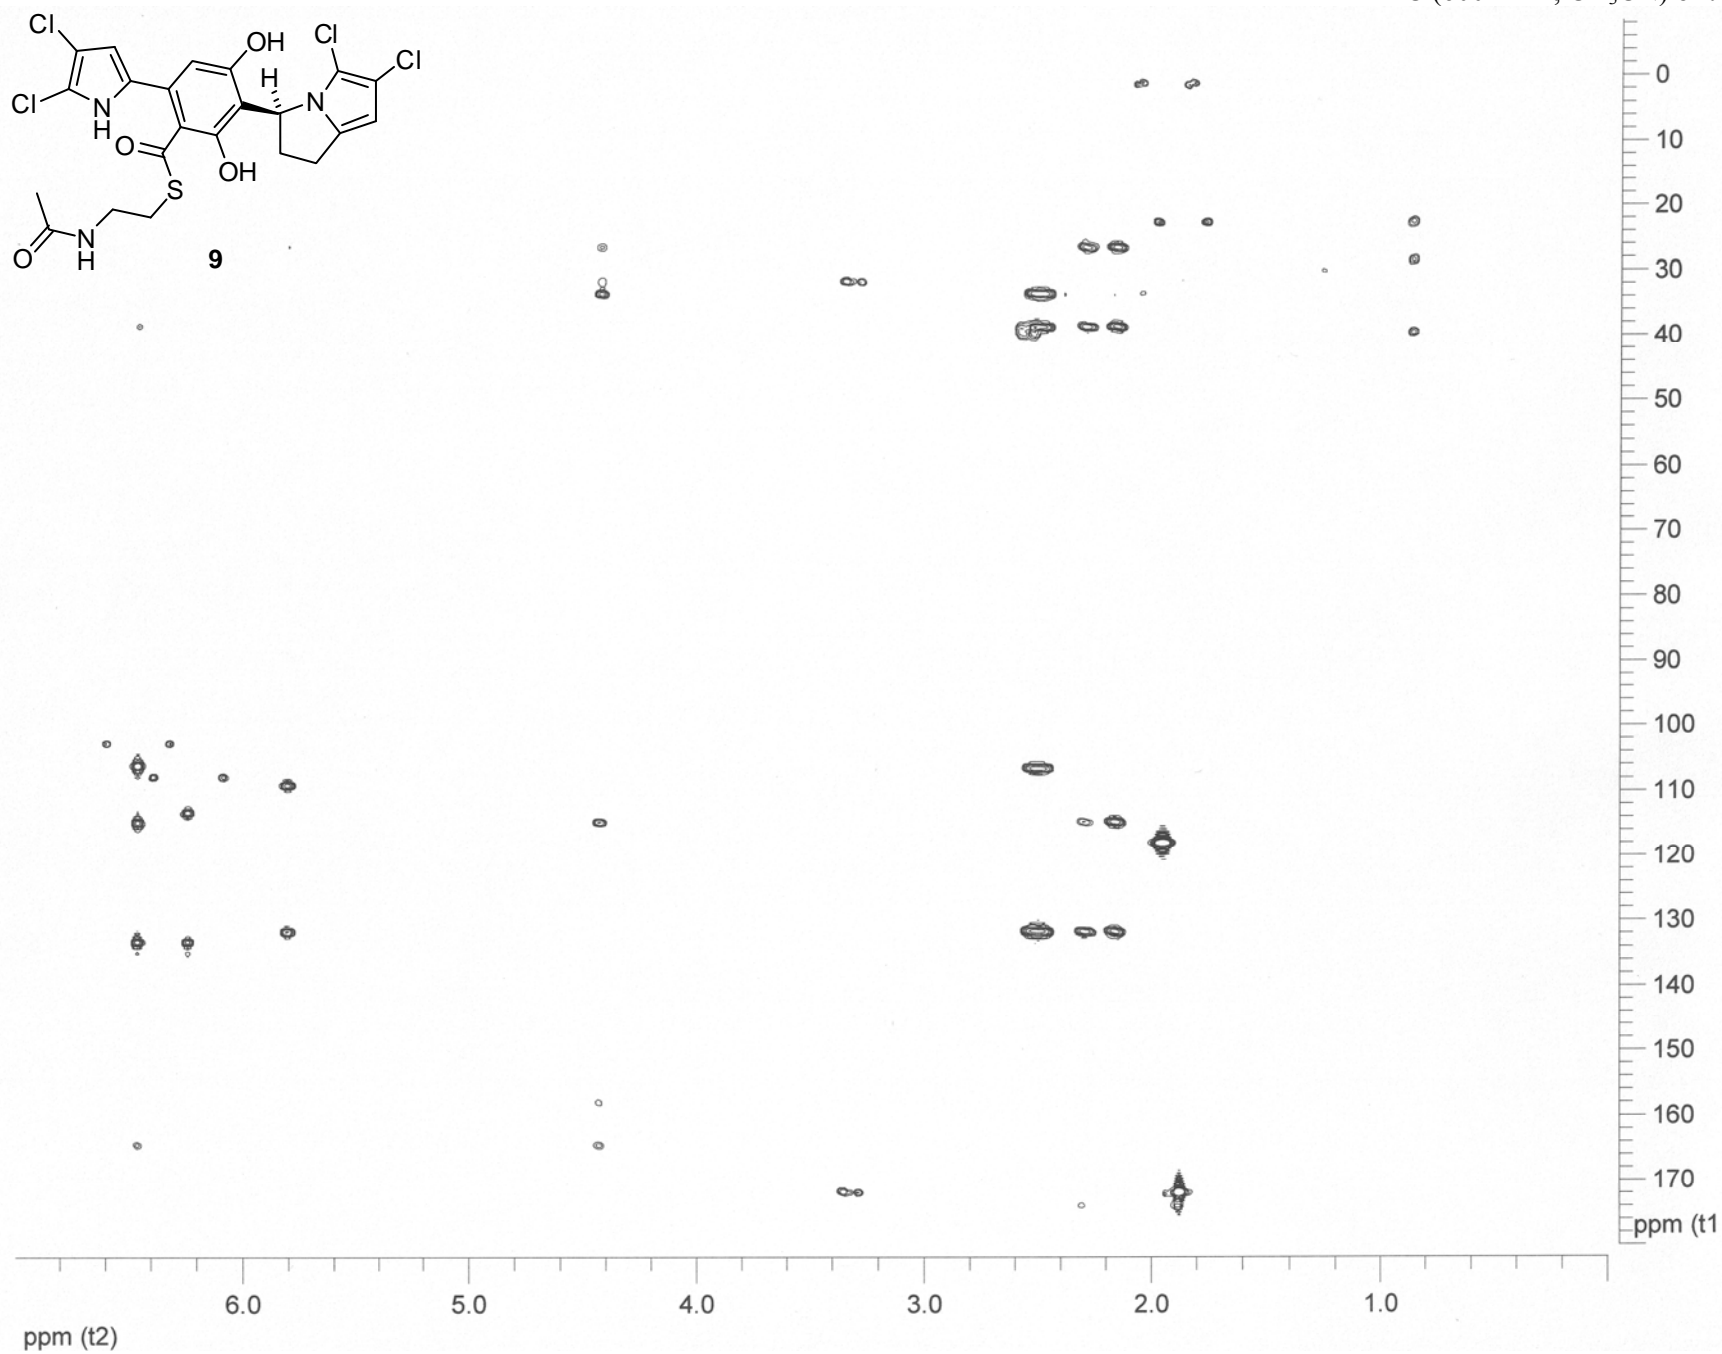

thiolsemip1 #4764 RT: 15.88 AV: 1 NL: 1.44E6 microAU

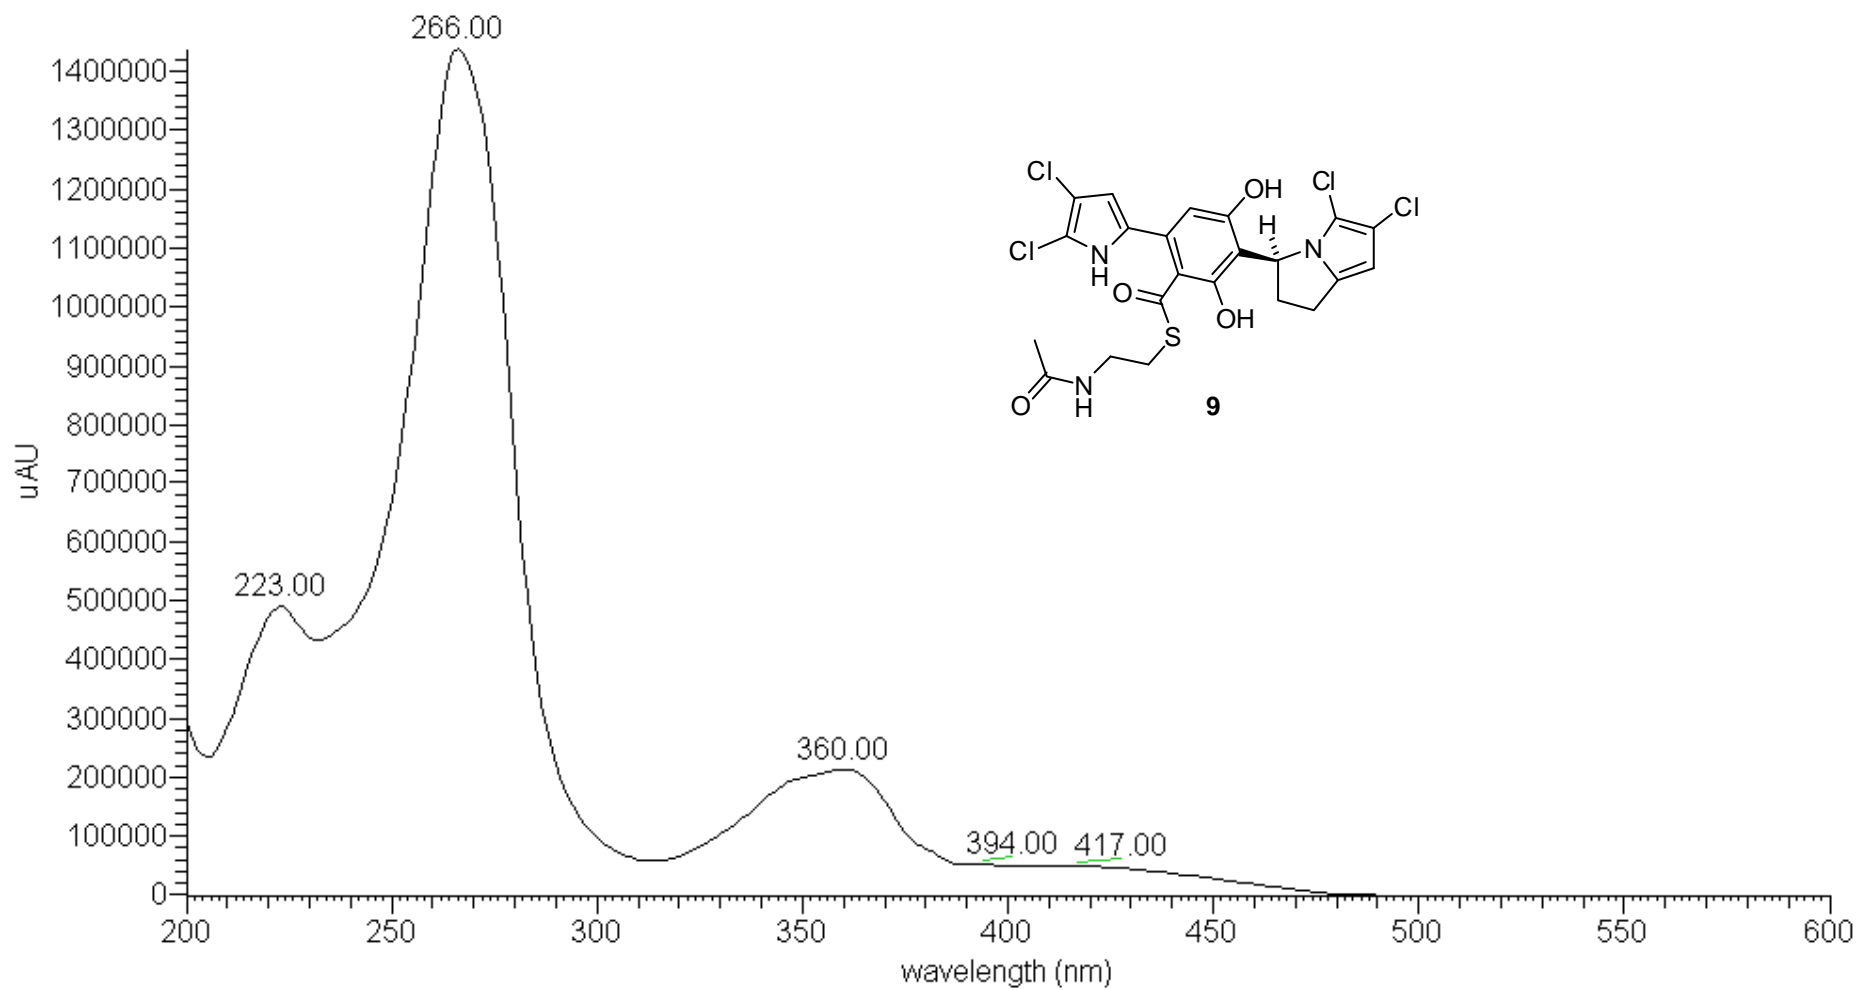



Polarity/Scan Type: Positive

Sample Name: flch8376

Acq. File: 022311007.wiff  
Acq. Date: Wednesday, February 23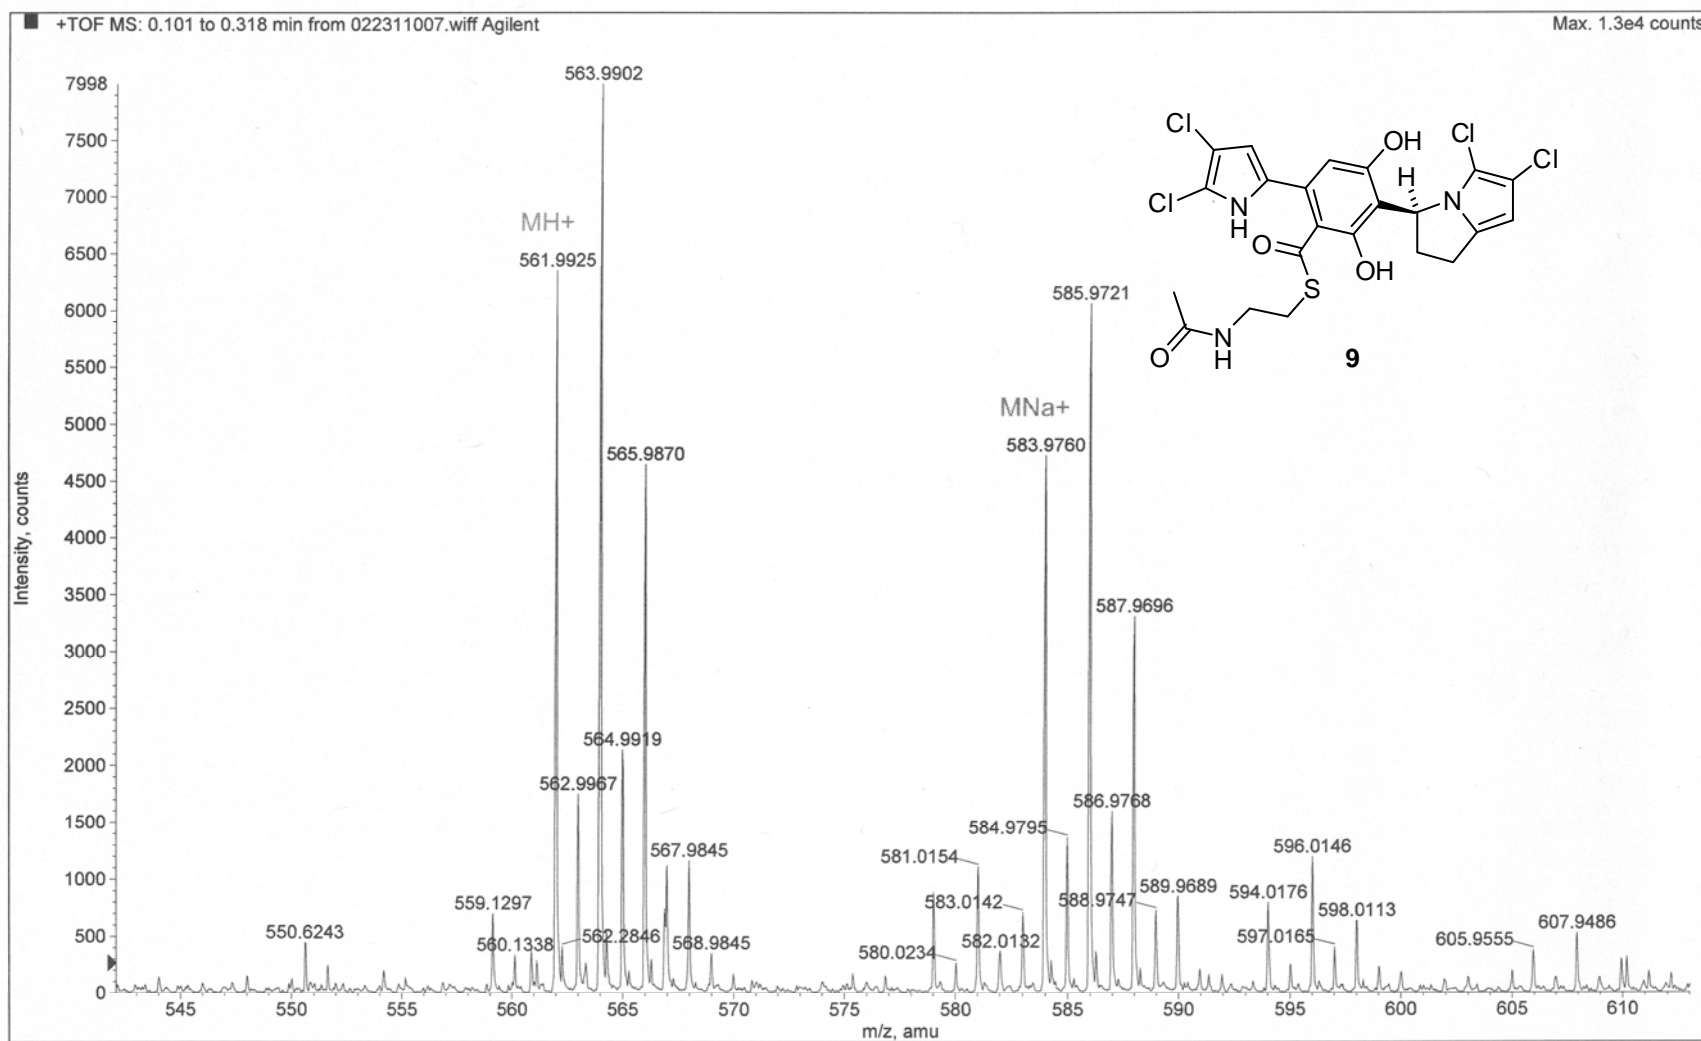

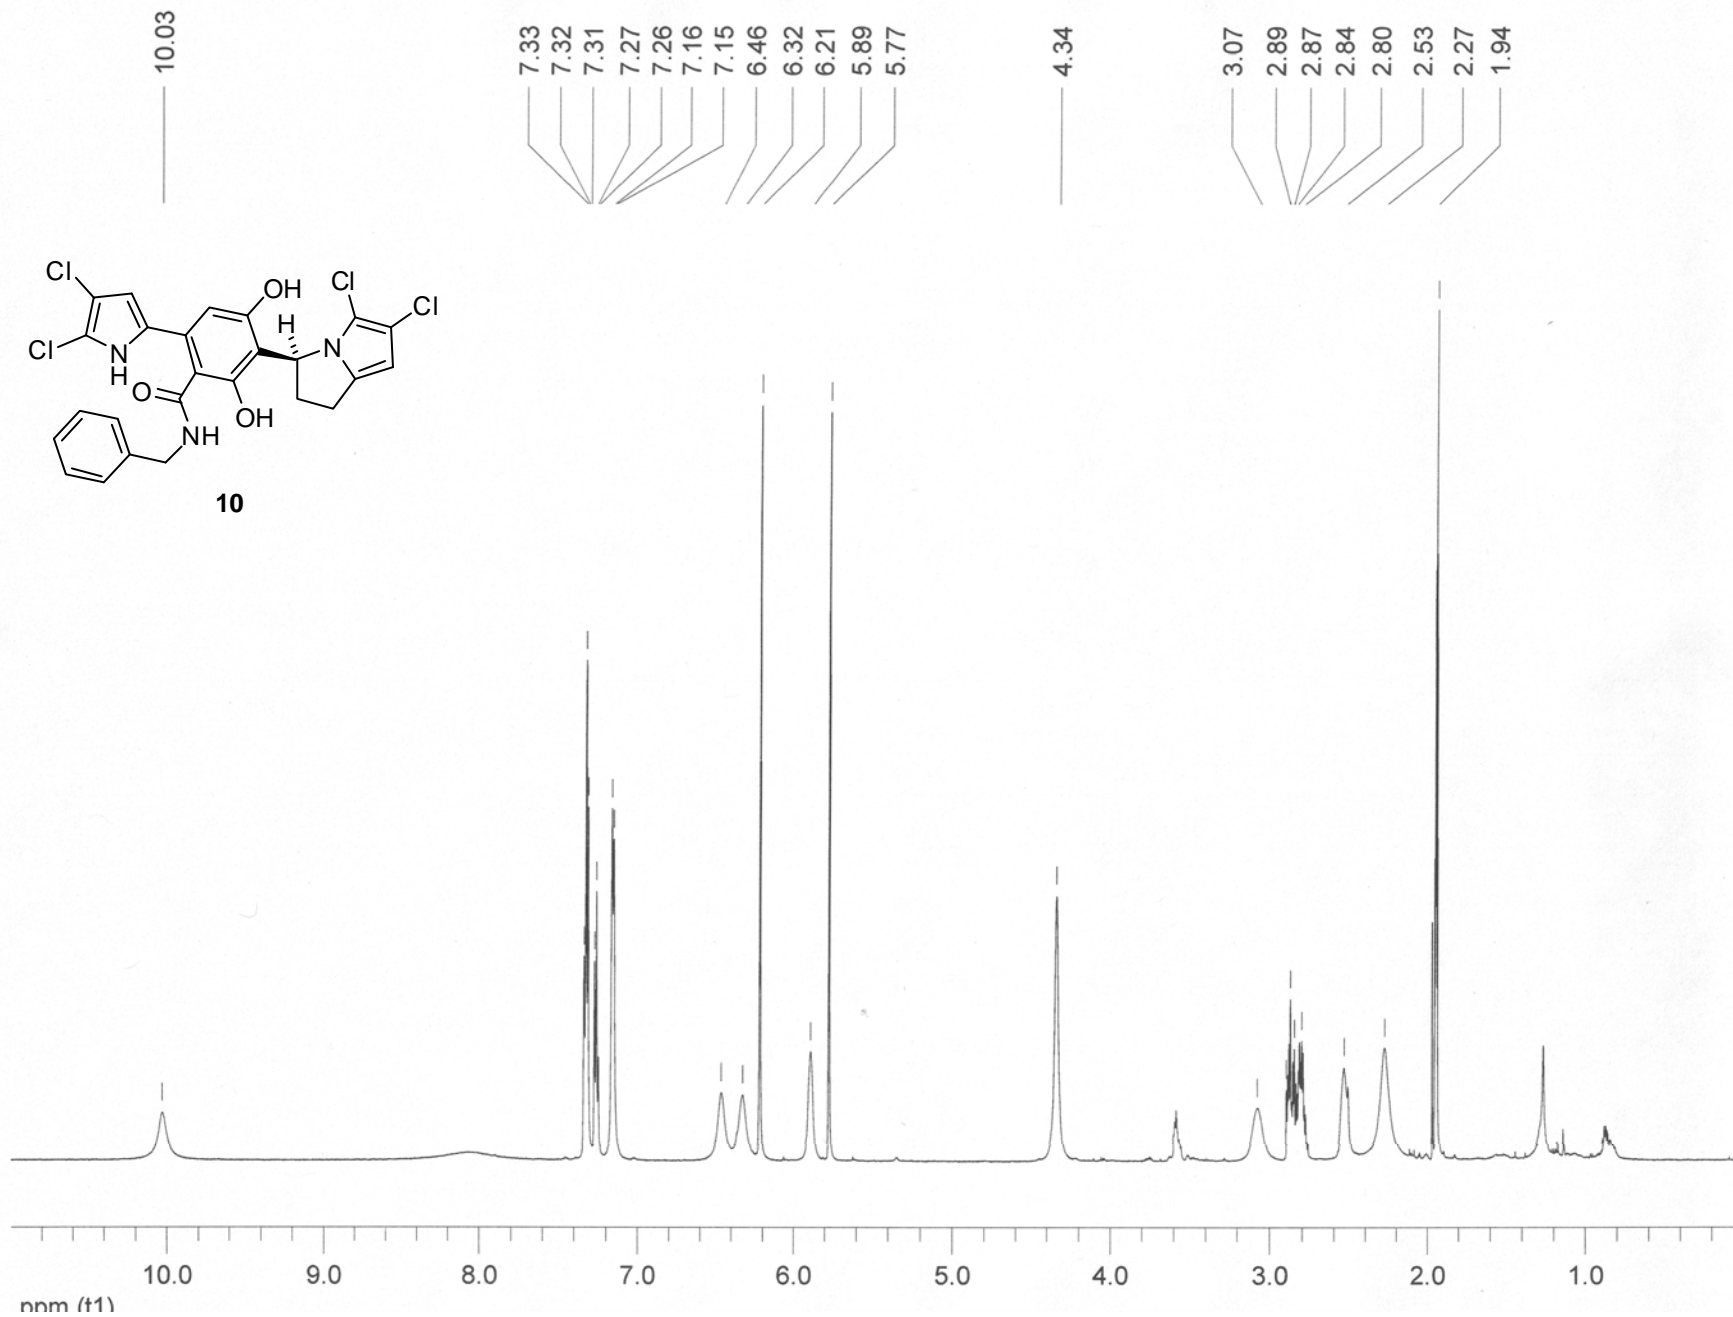

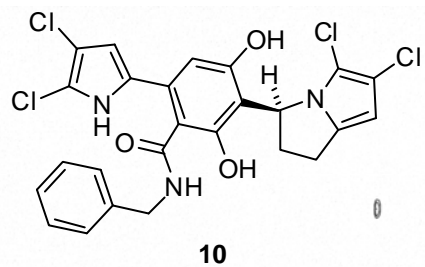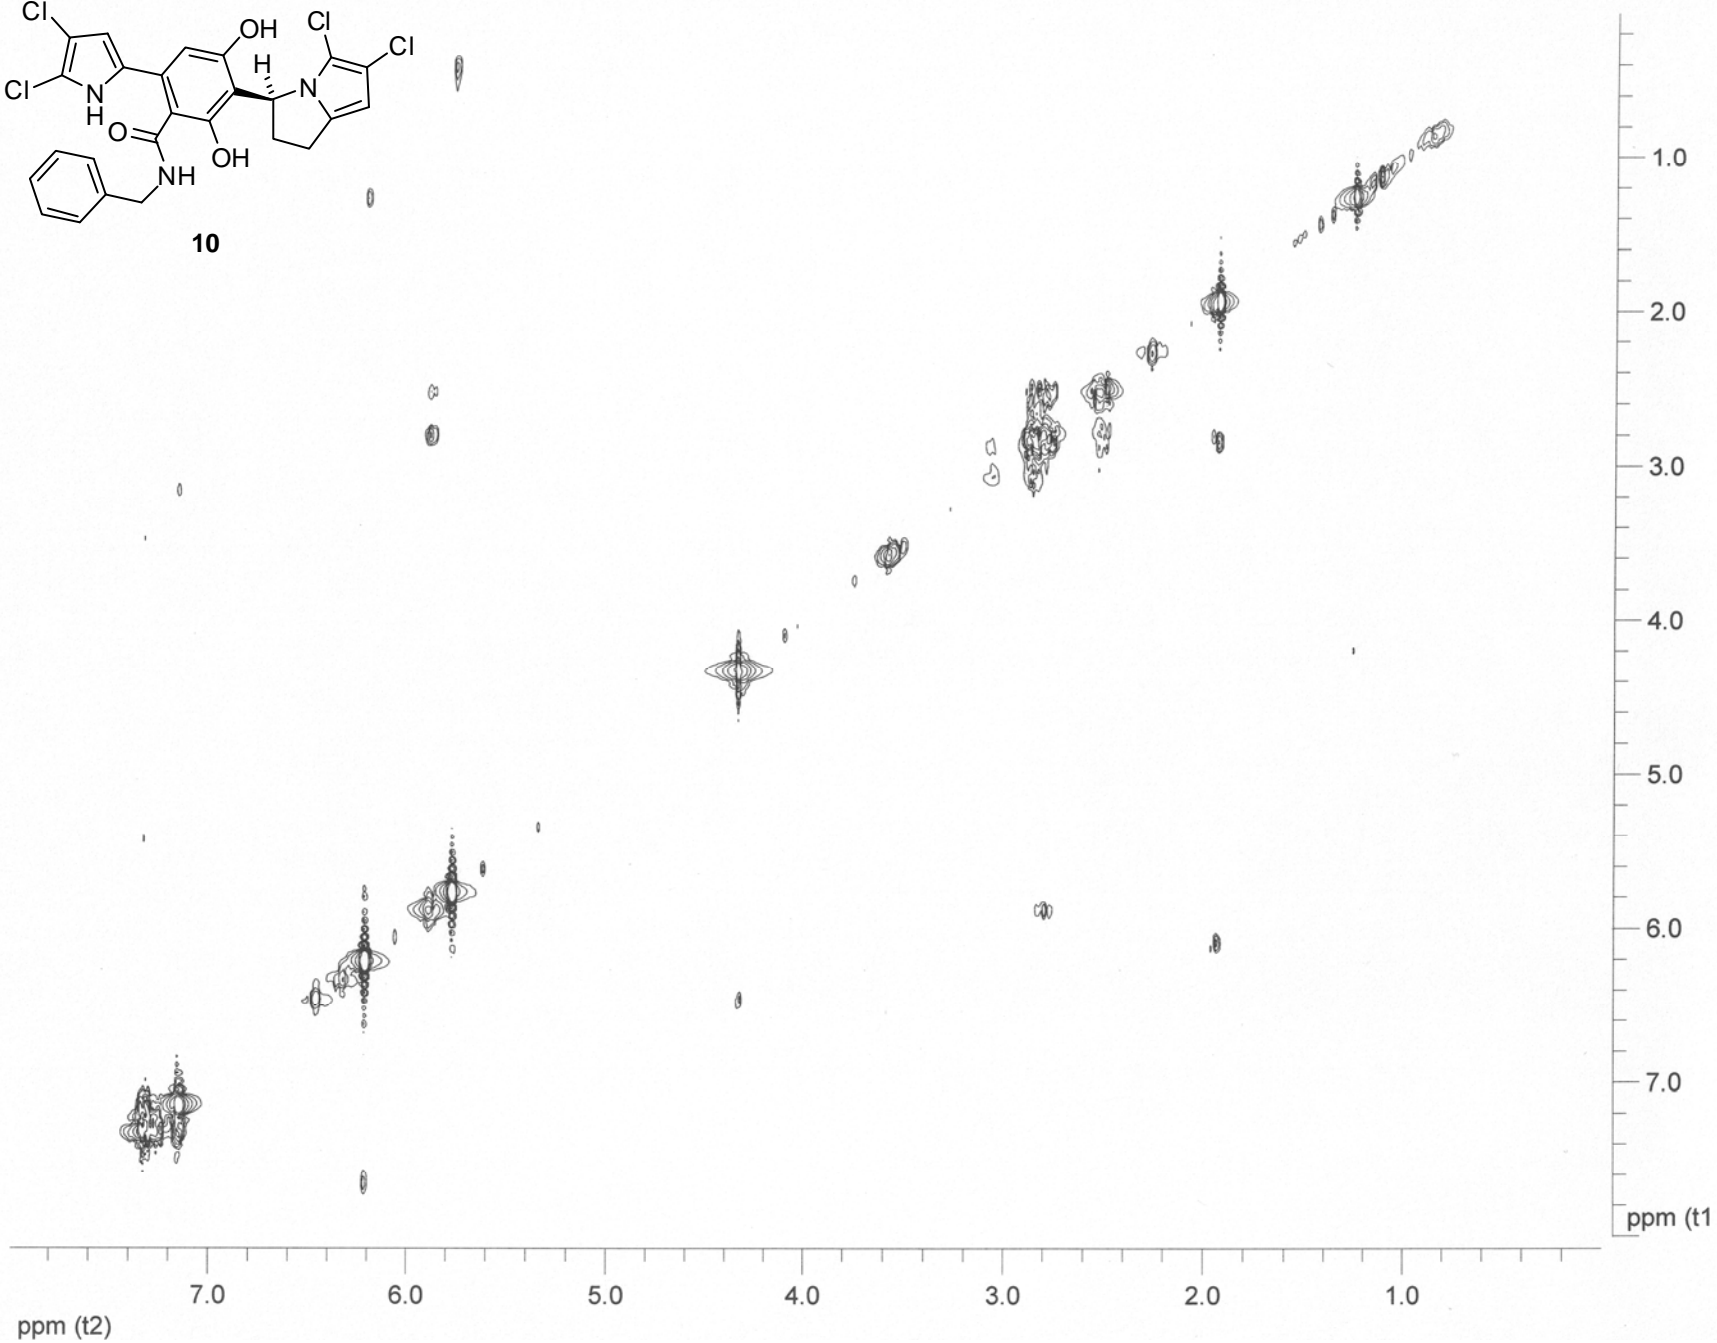

HSQC (600 MHz, CD<sub>3</sub>CN) of amide **10**

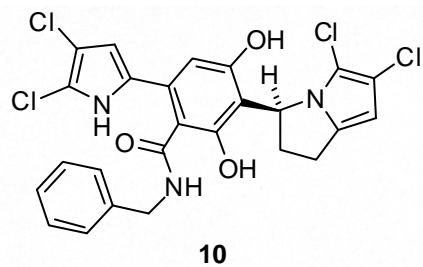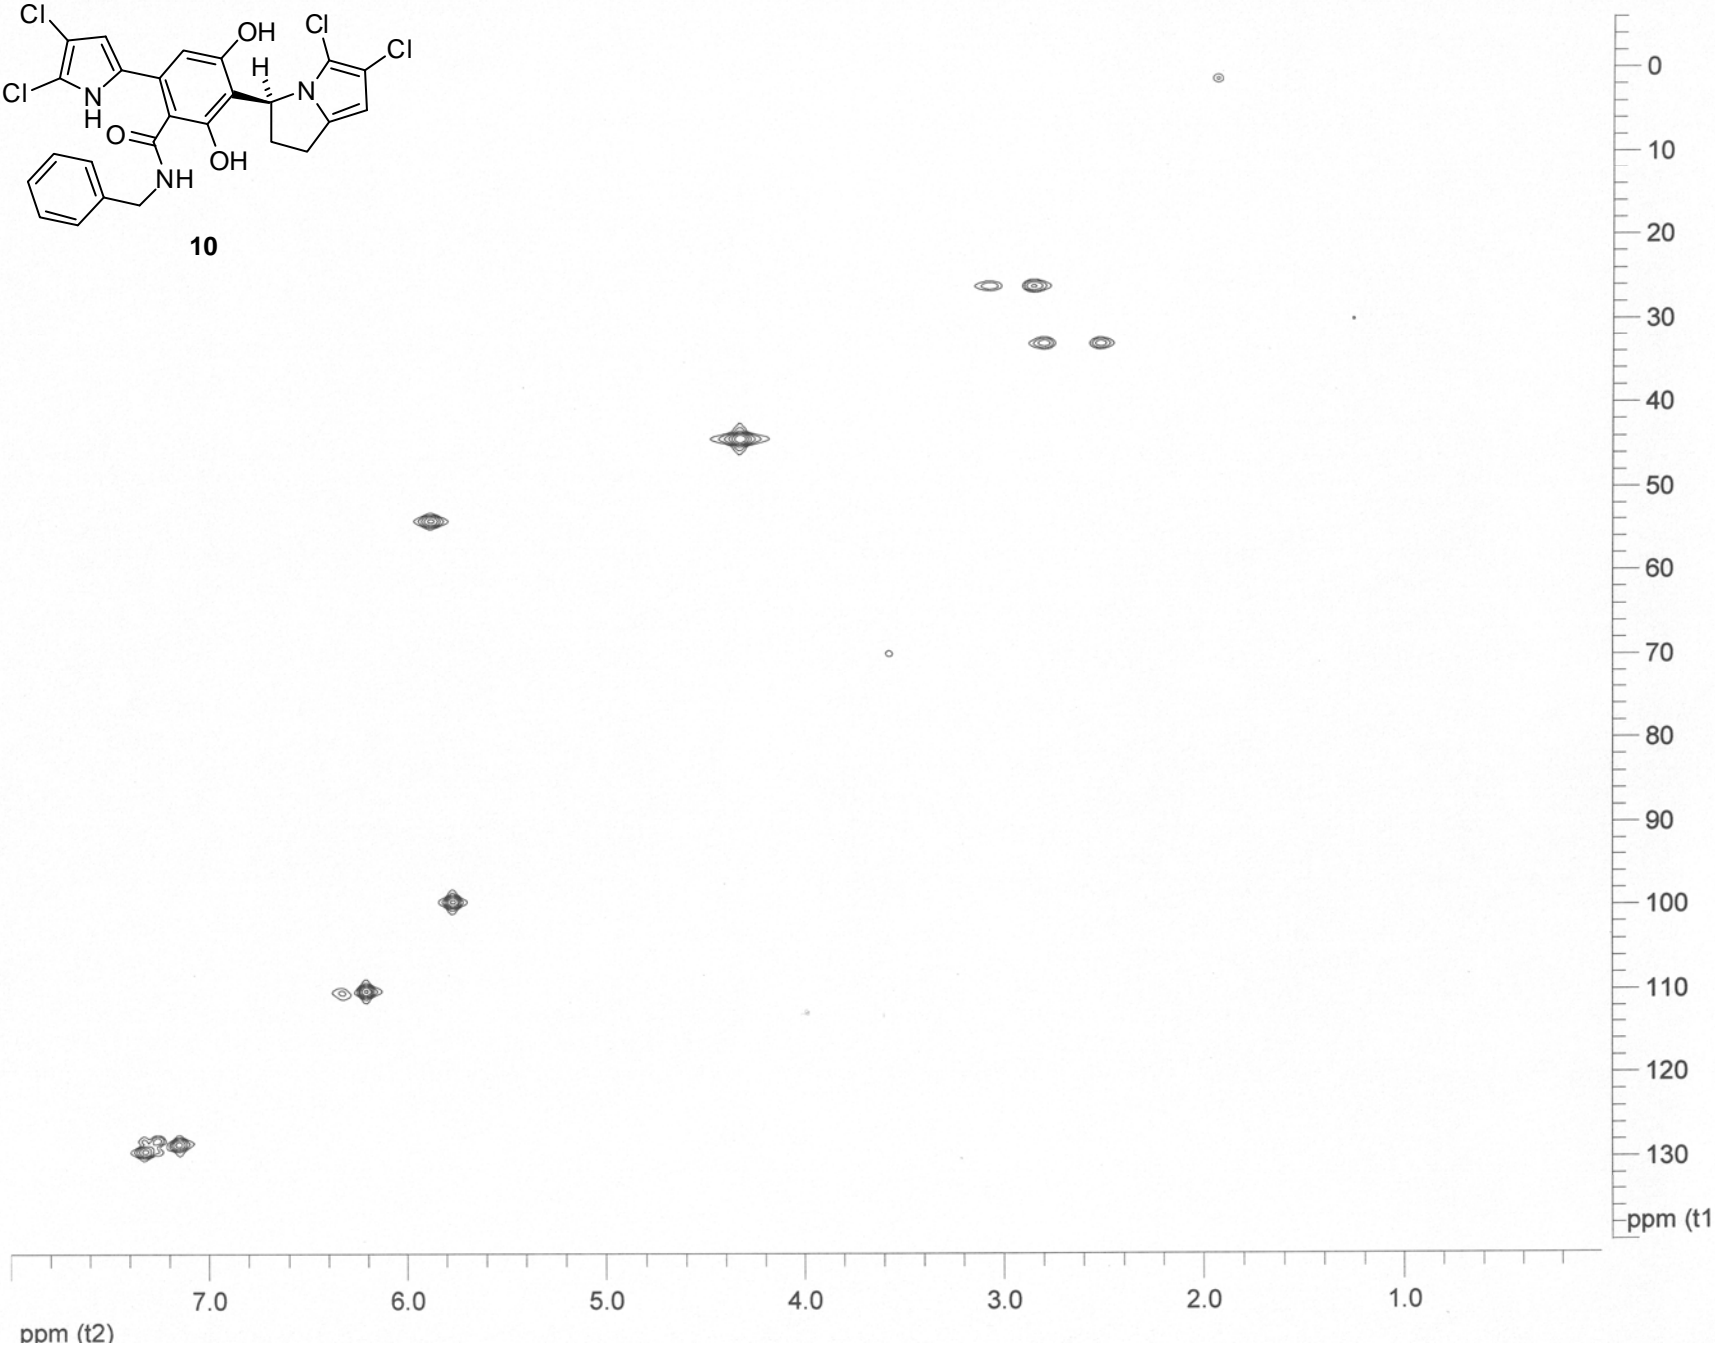

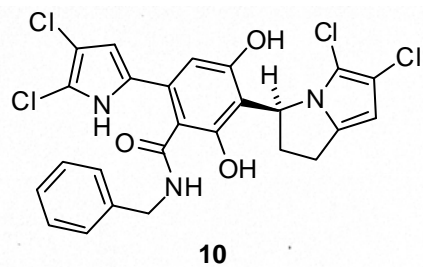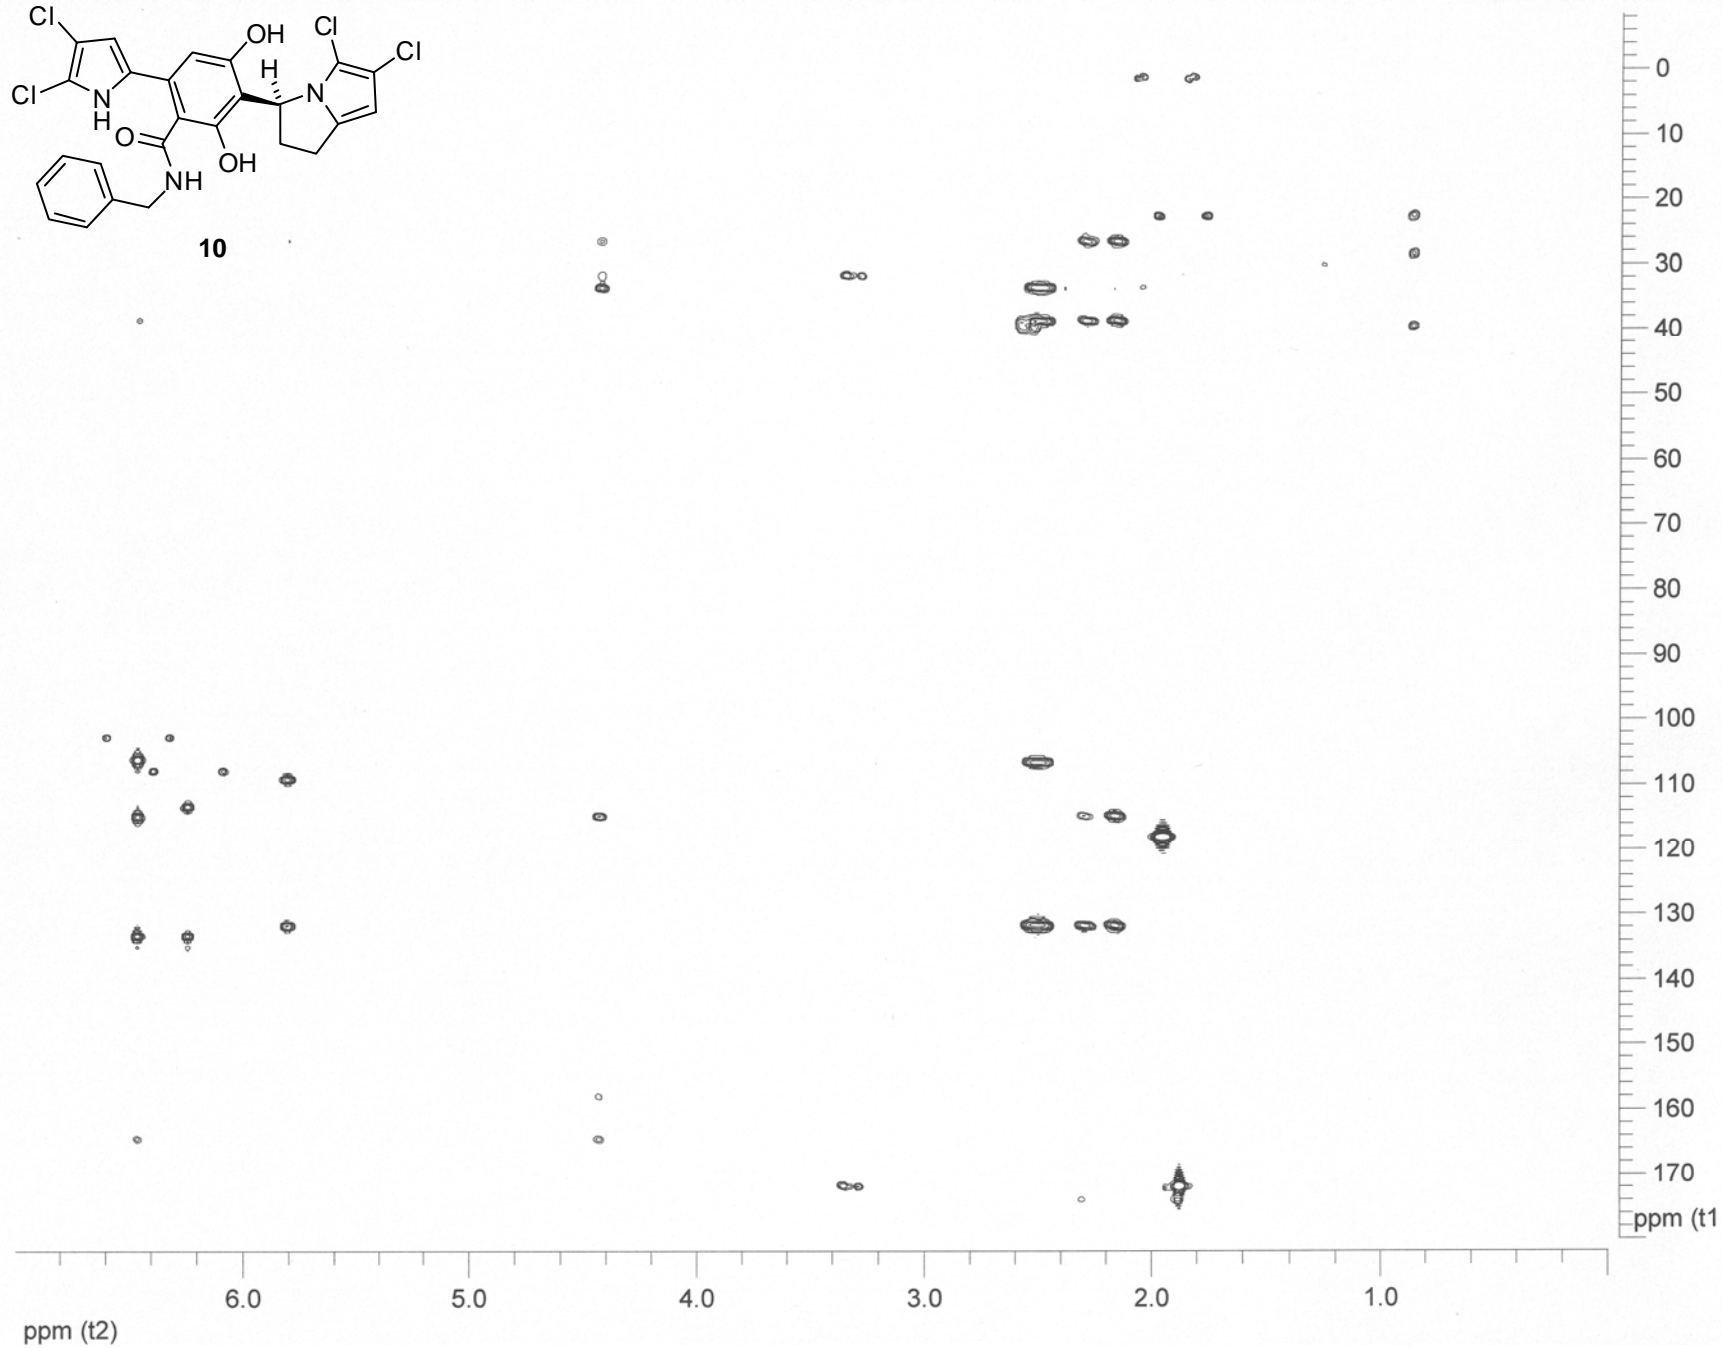

may3benzylaminebig1 #5605 RT: 18.68 AV: 1 NL: 1.69E6 microAU

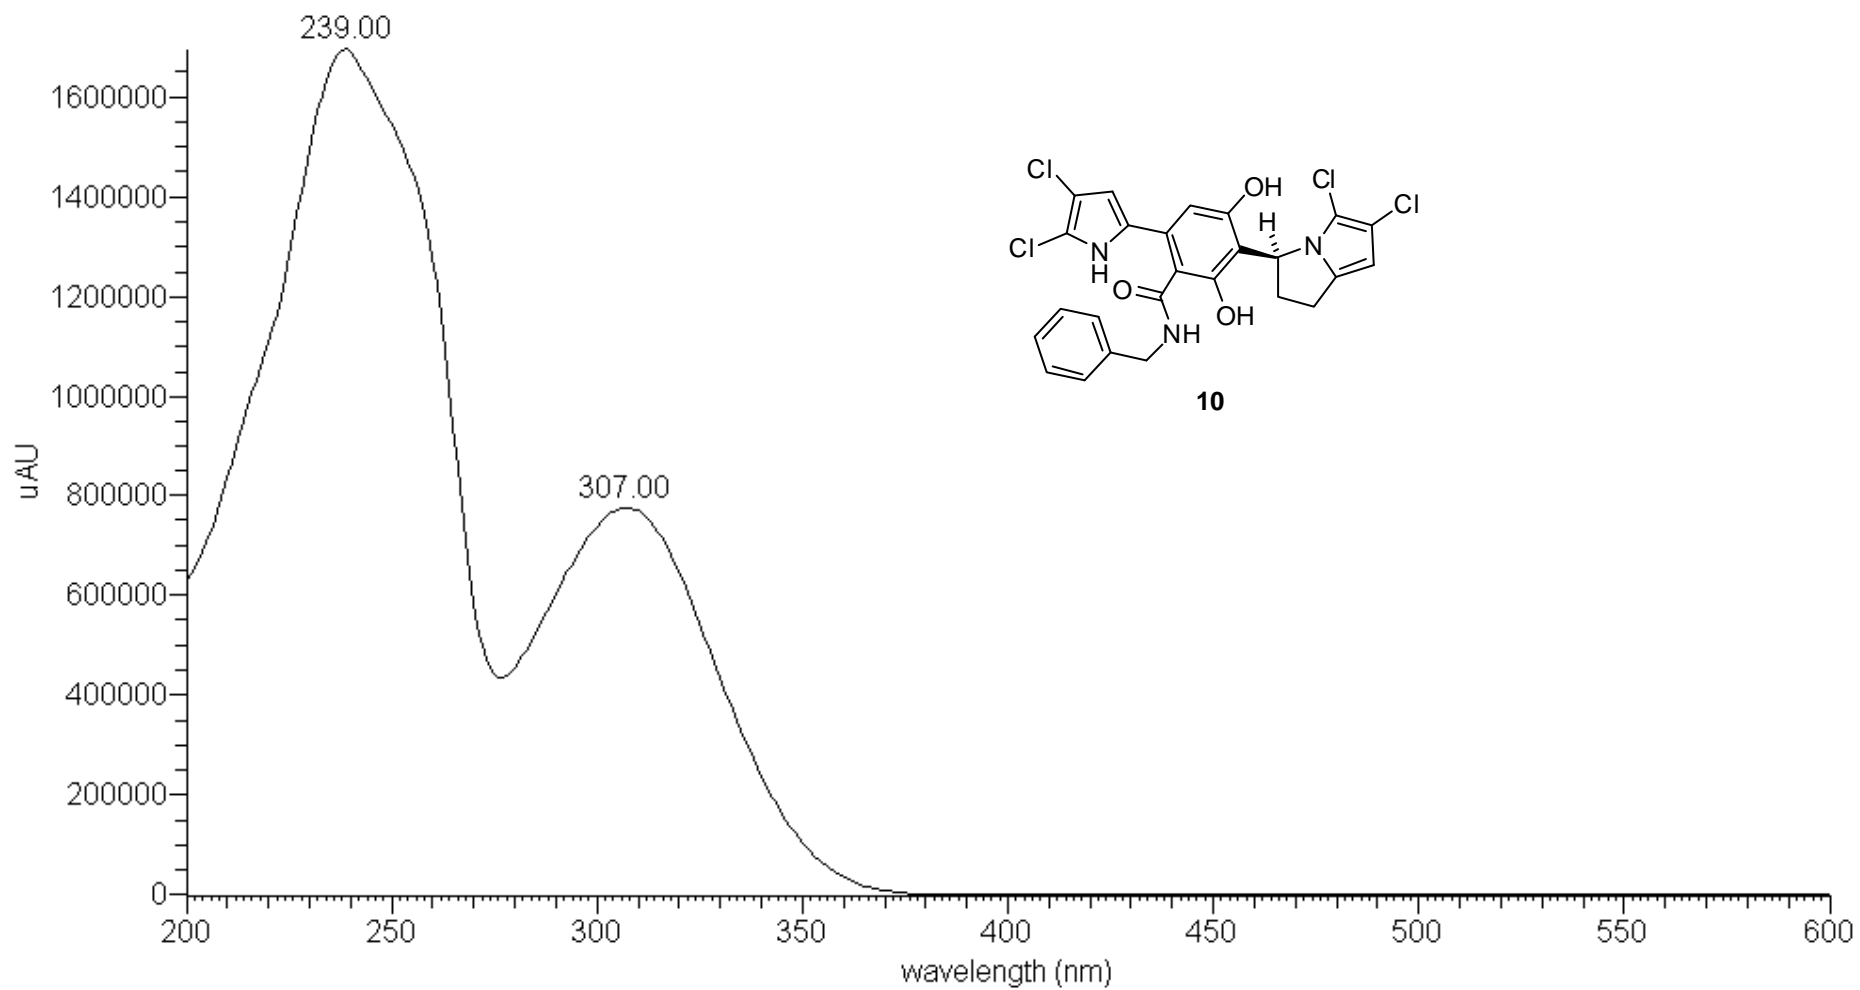

Polarity/Scan Type: Positive

Sample Name: fch8375

Acq. File: 022311006.wiff  
Acq. Date: Wednesday, February 23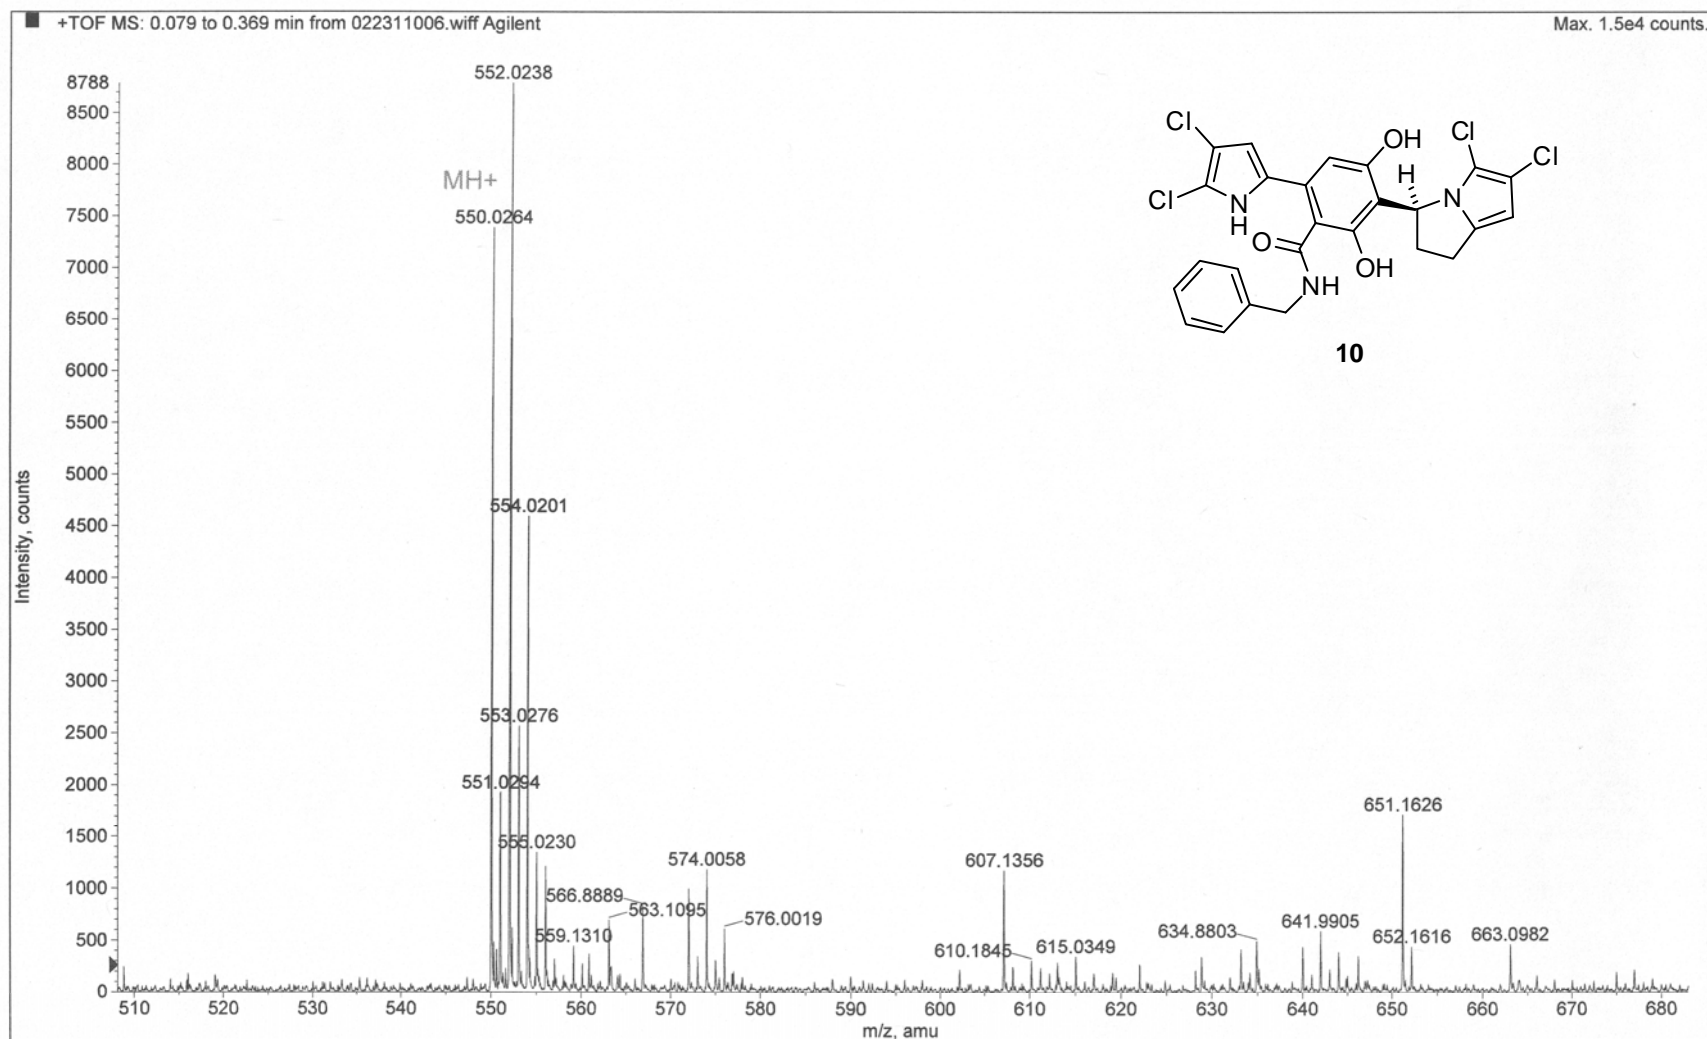

<sup>1</sup>H NMR (600 MHz, CD<sub>3</sub>CN) of diacetylated thioester **12**

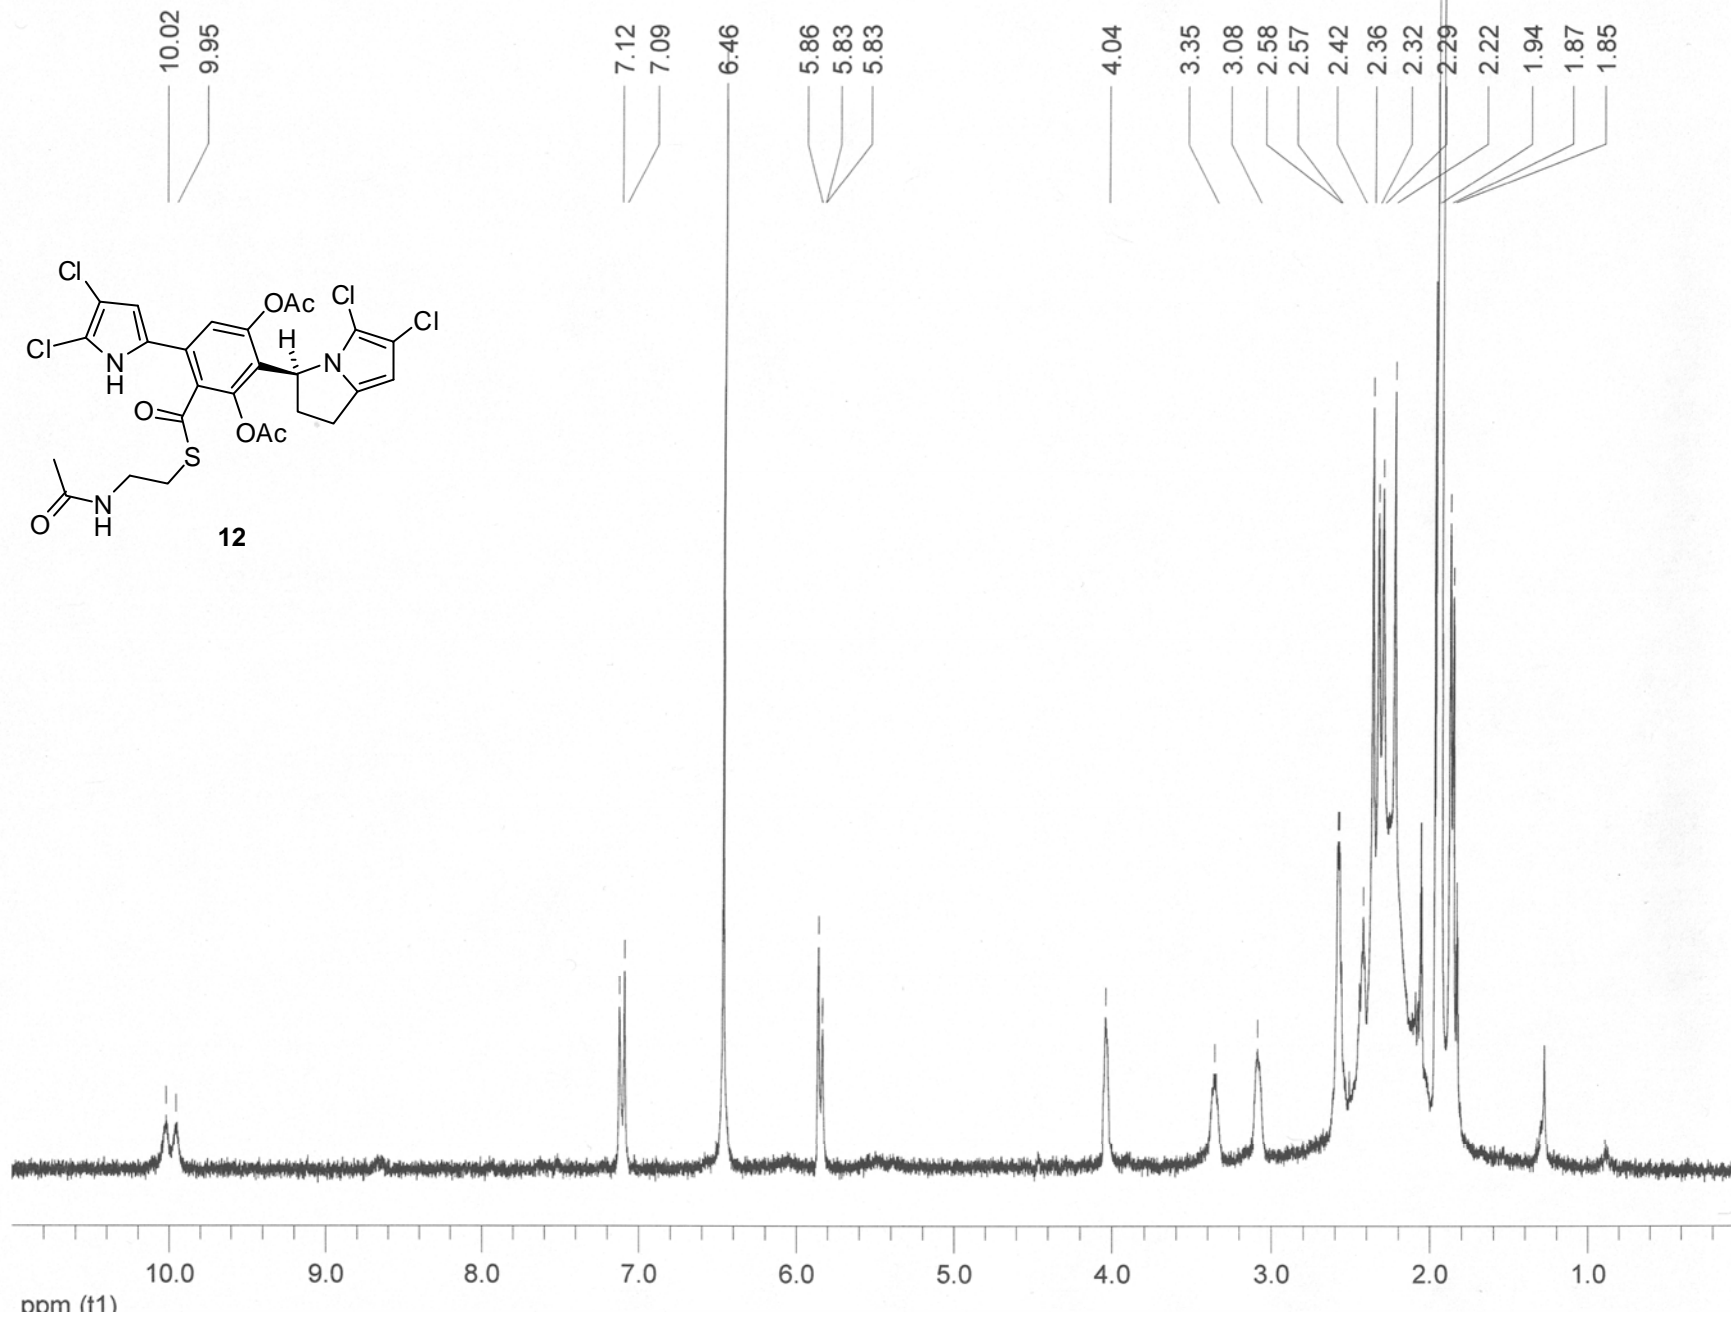



may4thioesterAc201P #5285 RT: 17.61 AV: 1 NL: 1.59E6 microAU

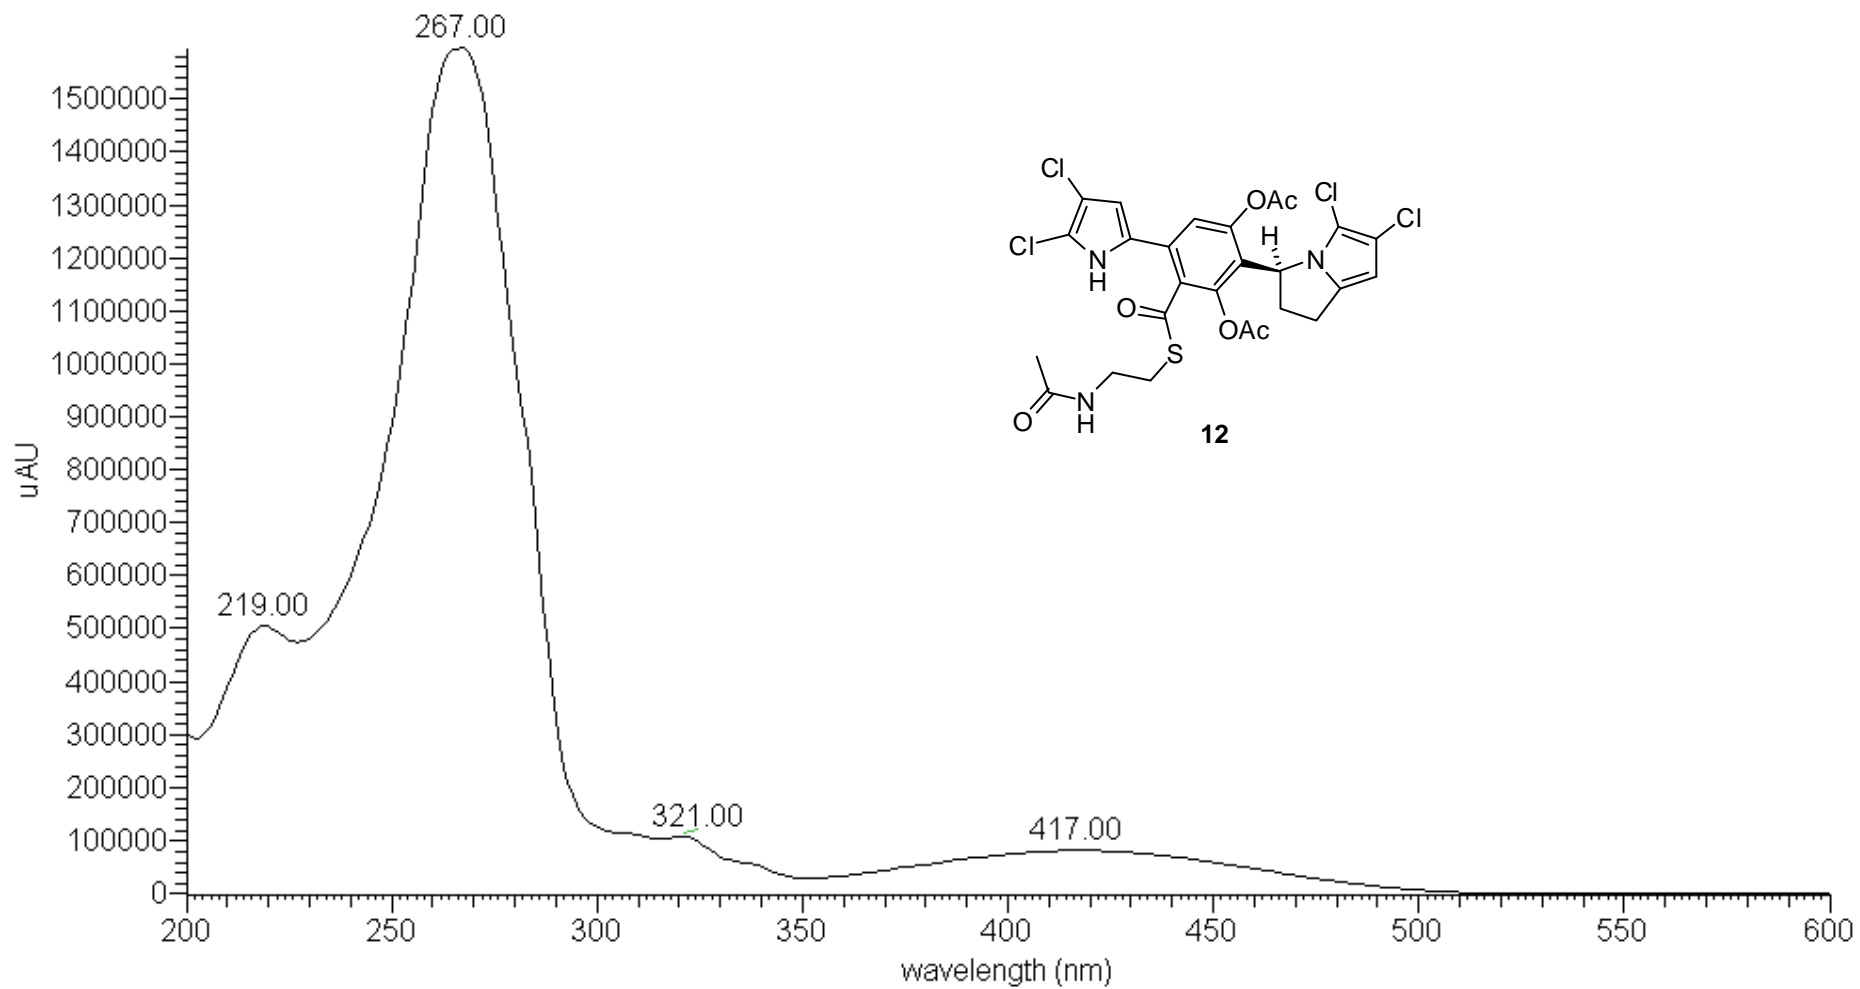

Polarity/Scan Type: Positive

Sample Name: fch1277

Acq. File: 050511202.wiff  
Acq. Date: Thursday, May 05, 2011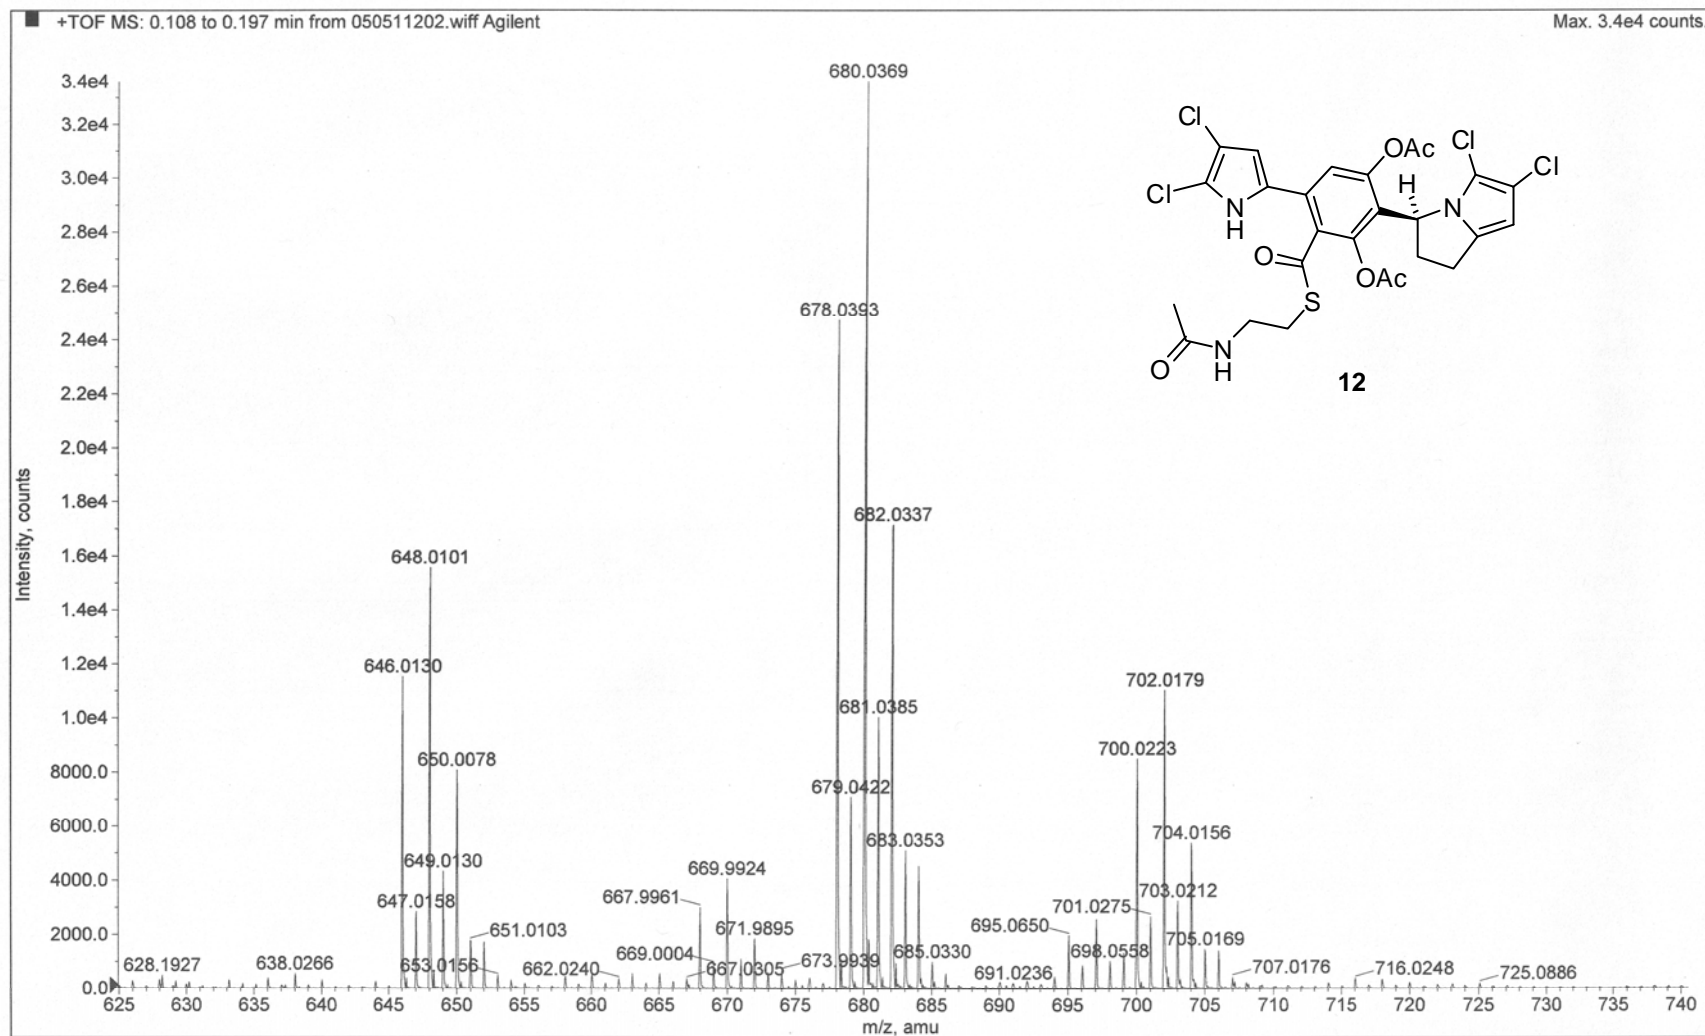

<sup>1</sup>H NMR (600 MHz, CD<sub>3</sub>CN) of triacetylated amide **13**

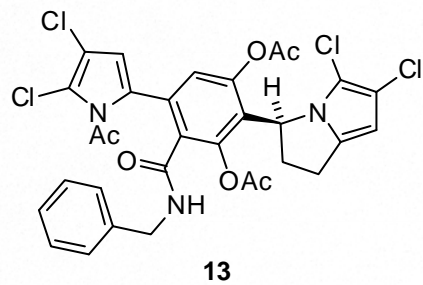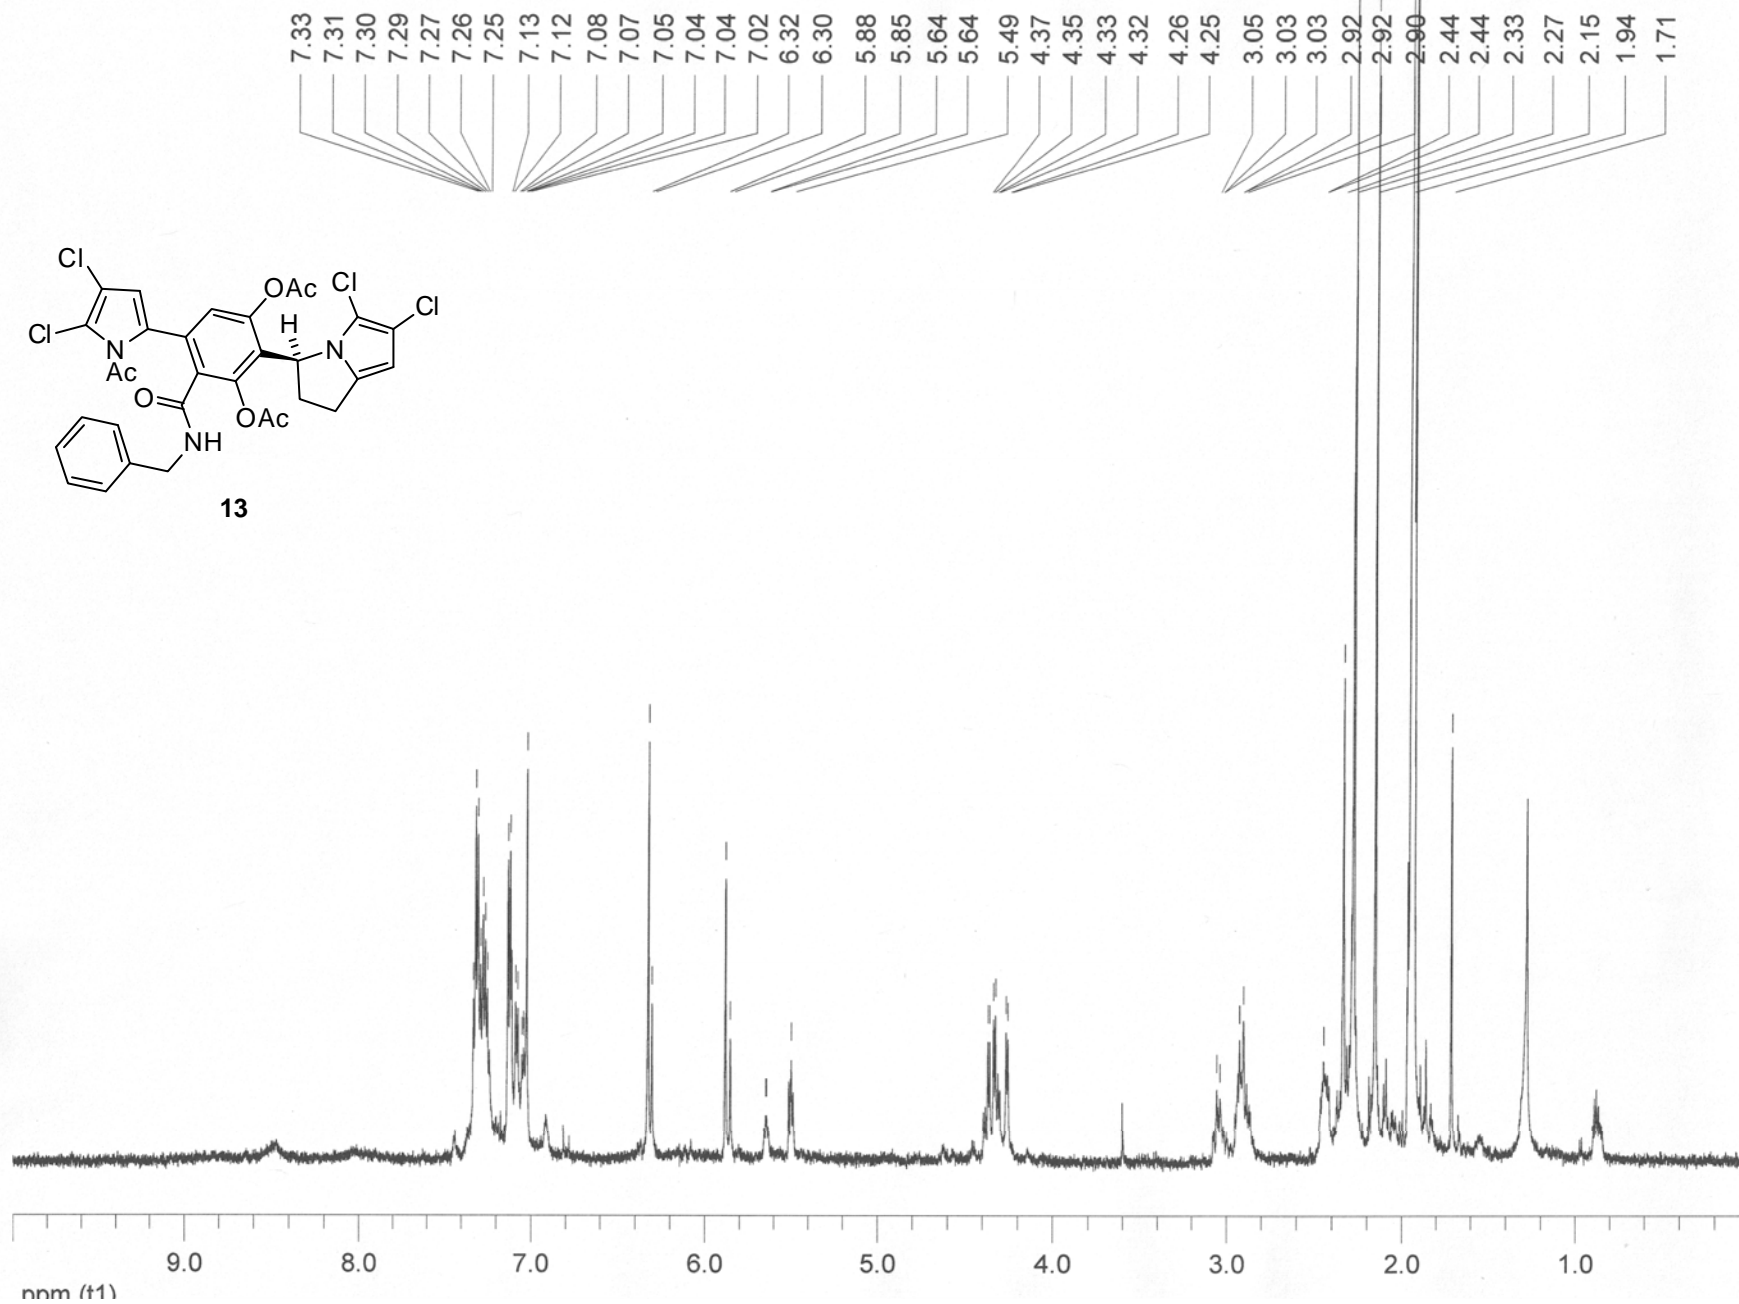

may3amideAc201 #5523 RT: 18.41 AV: 1 NL: 7.13E5 microAU

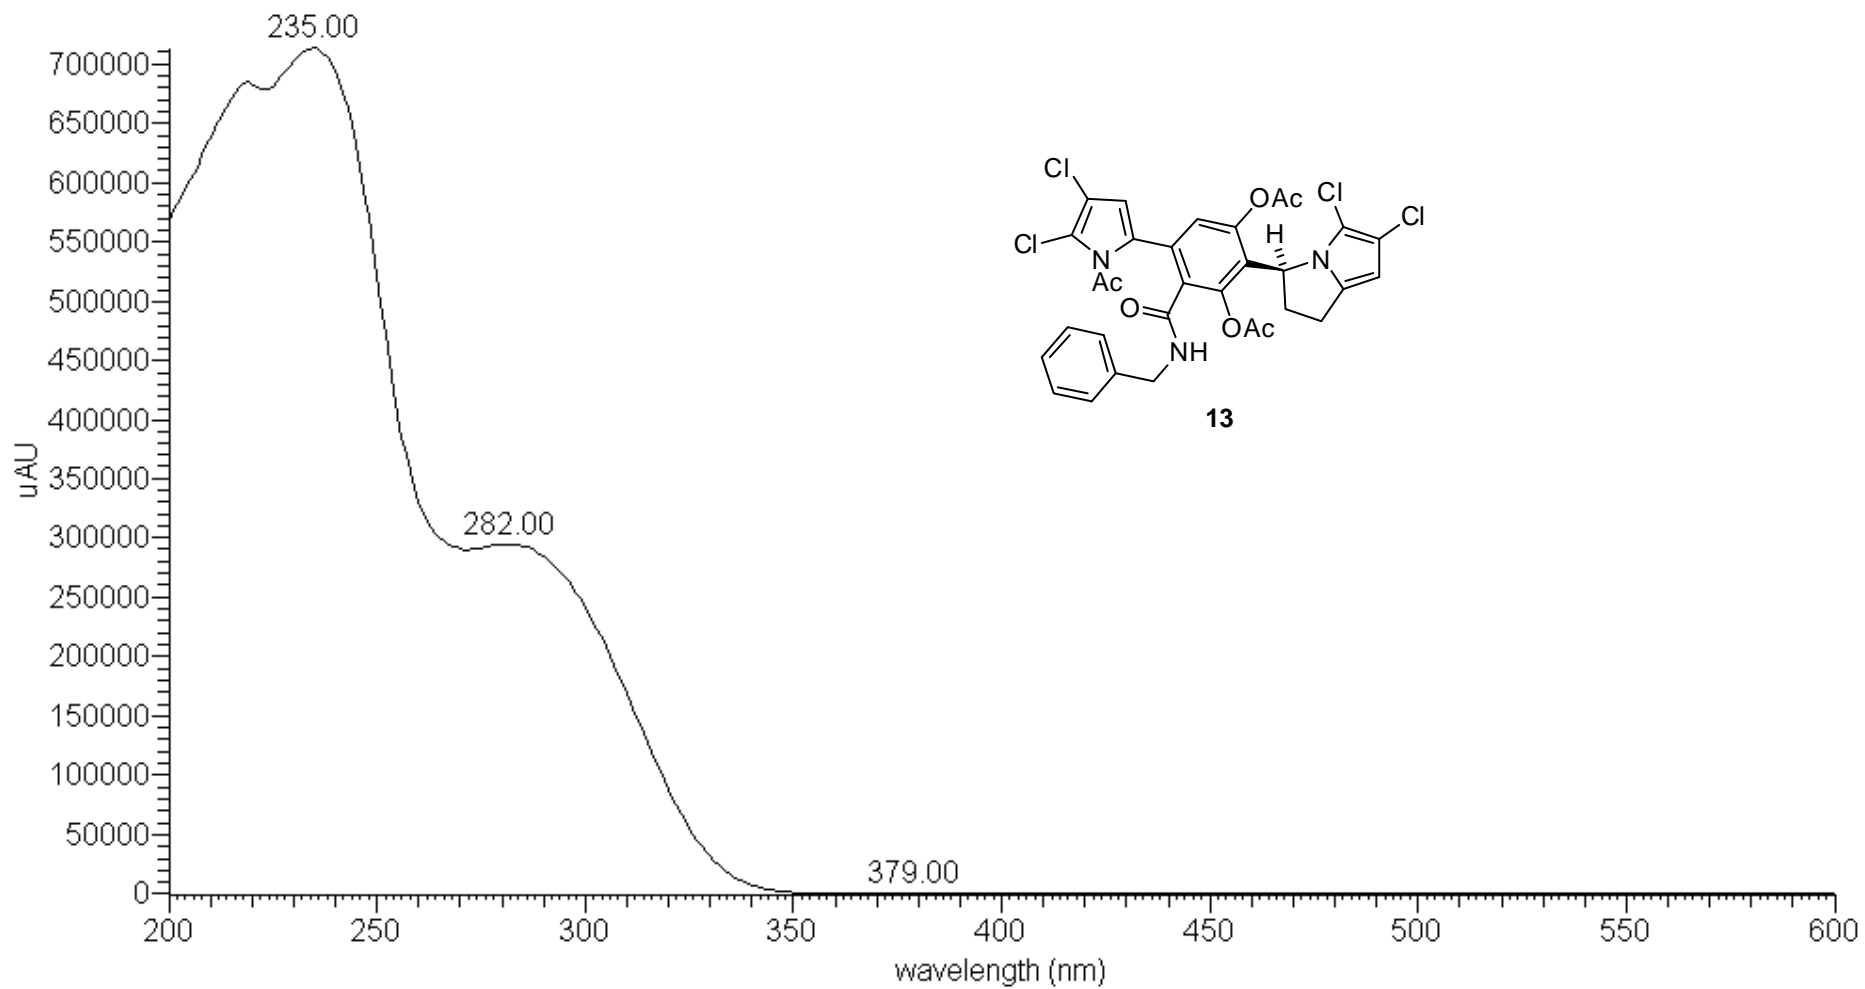

Polarity/Scan Type: Positive

Sample Name: fch1280

Acq. File: 050511300.wiff  
Acq. Date: Thursday, May 05, 2011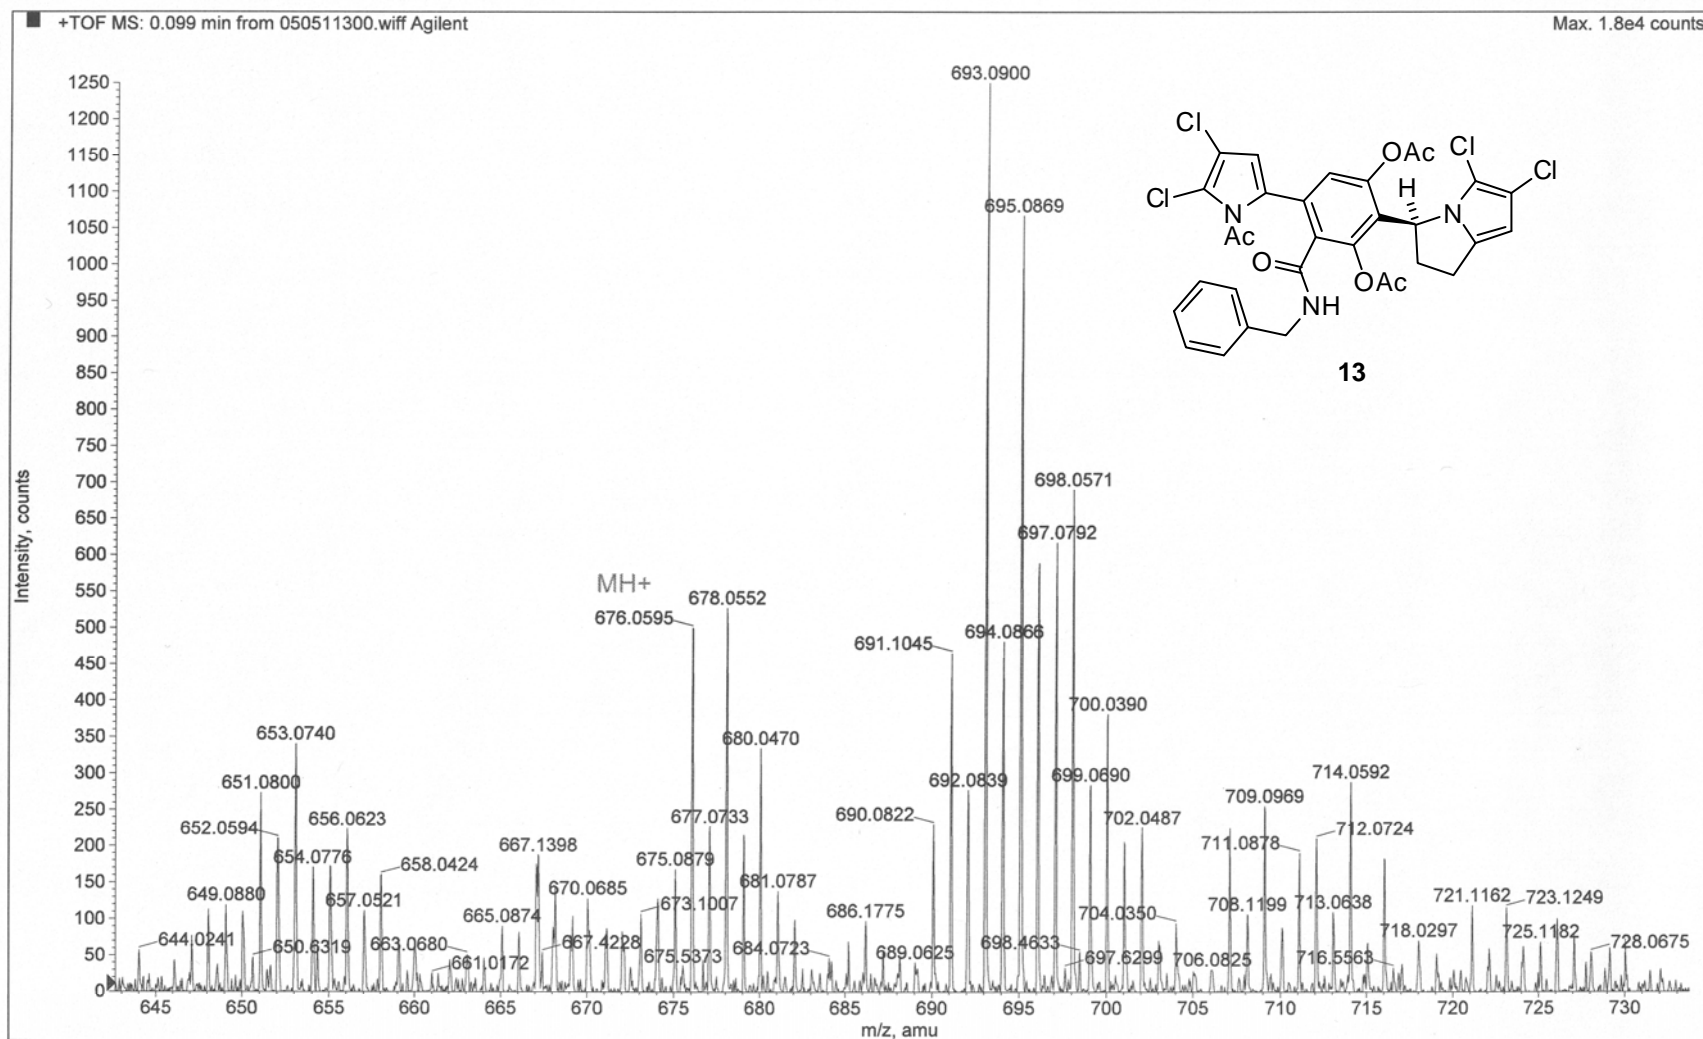

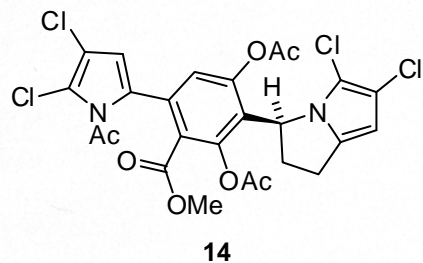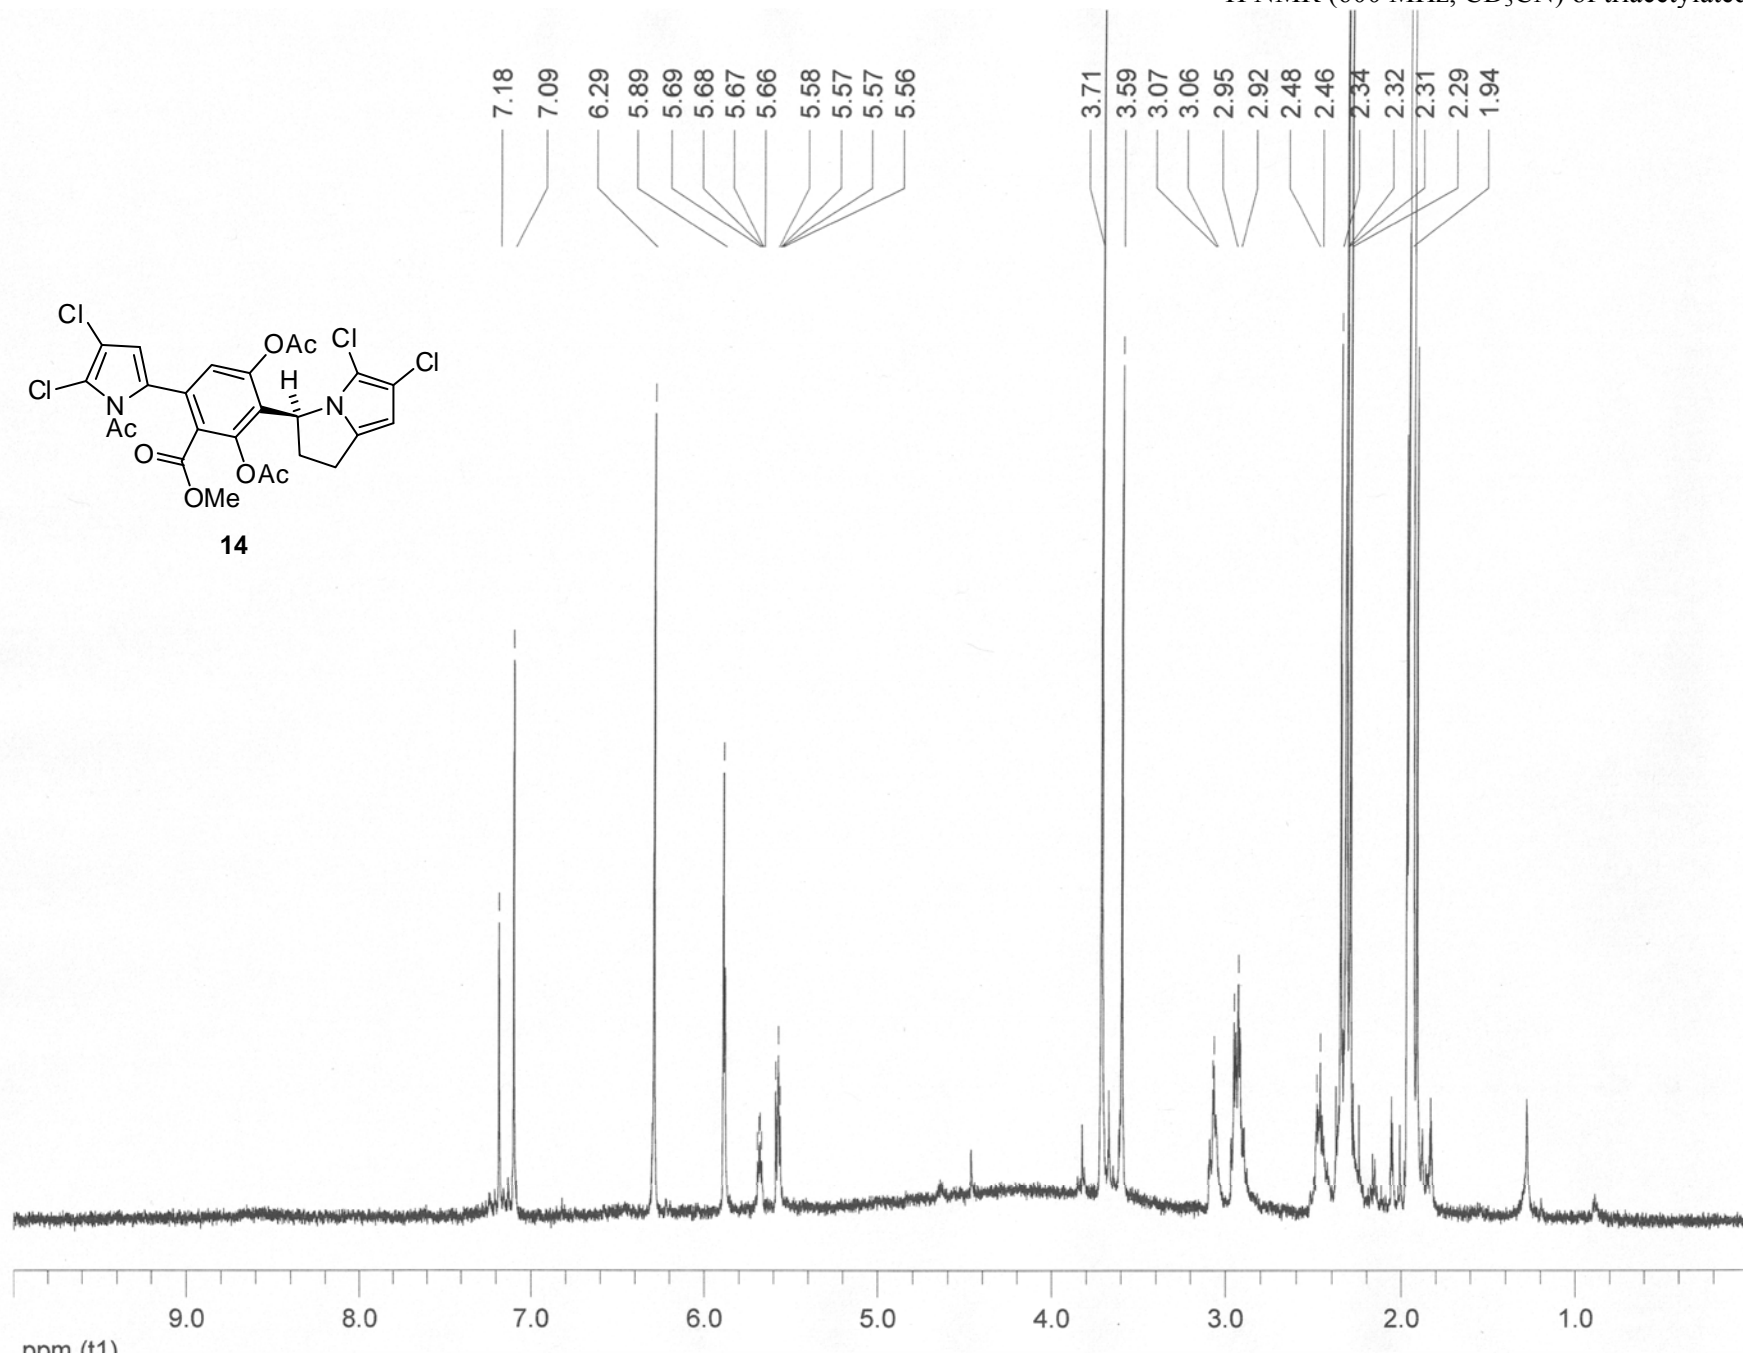

may3esterAc201 #5523 RT: 18.41 AV: 1 NL: 7.56E5 microAU

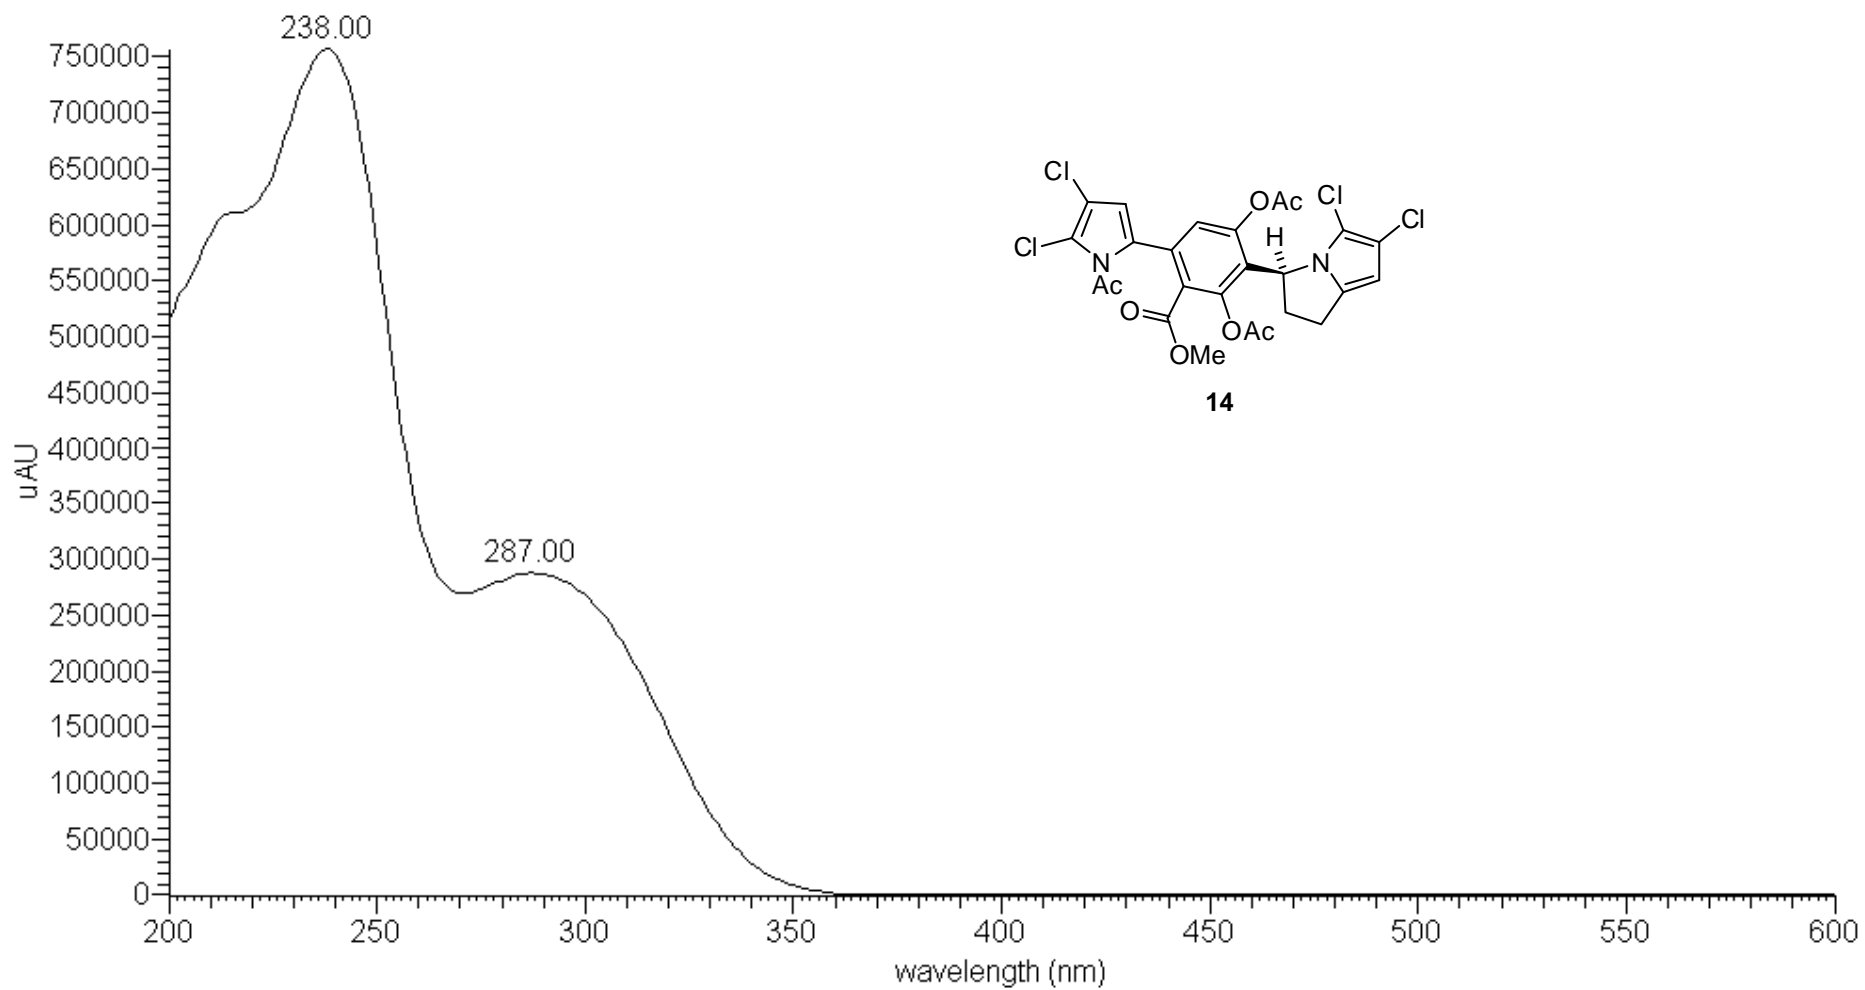

Polarity/Scan Type: Positive

Sample Name: fch1279

Acq. File: 050511204.wiff  
Acq. Date: Thursday, May 05, 2011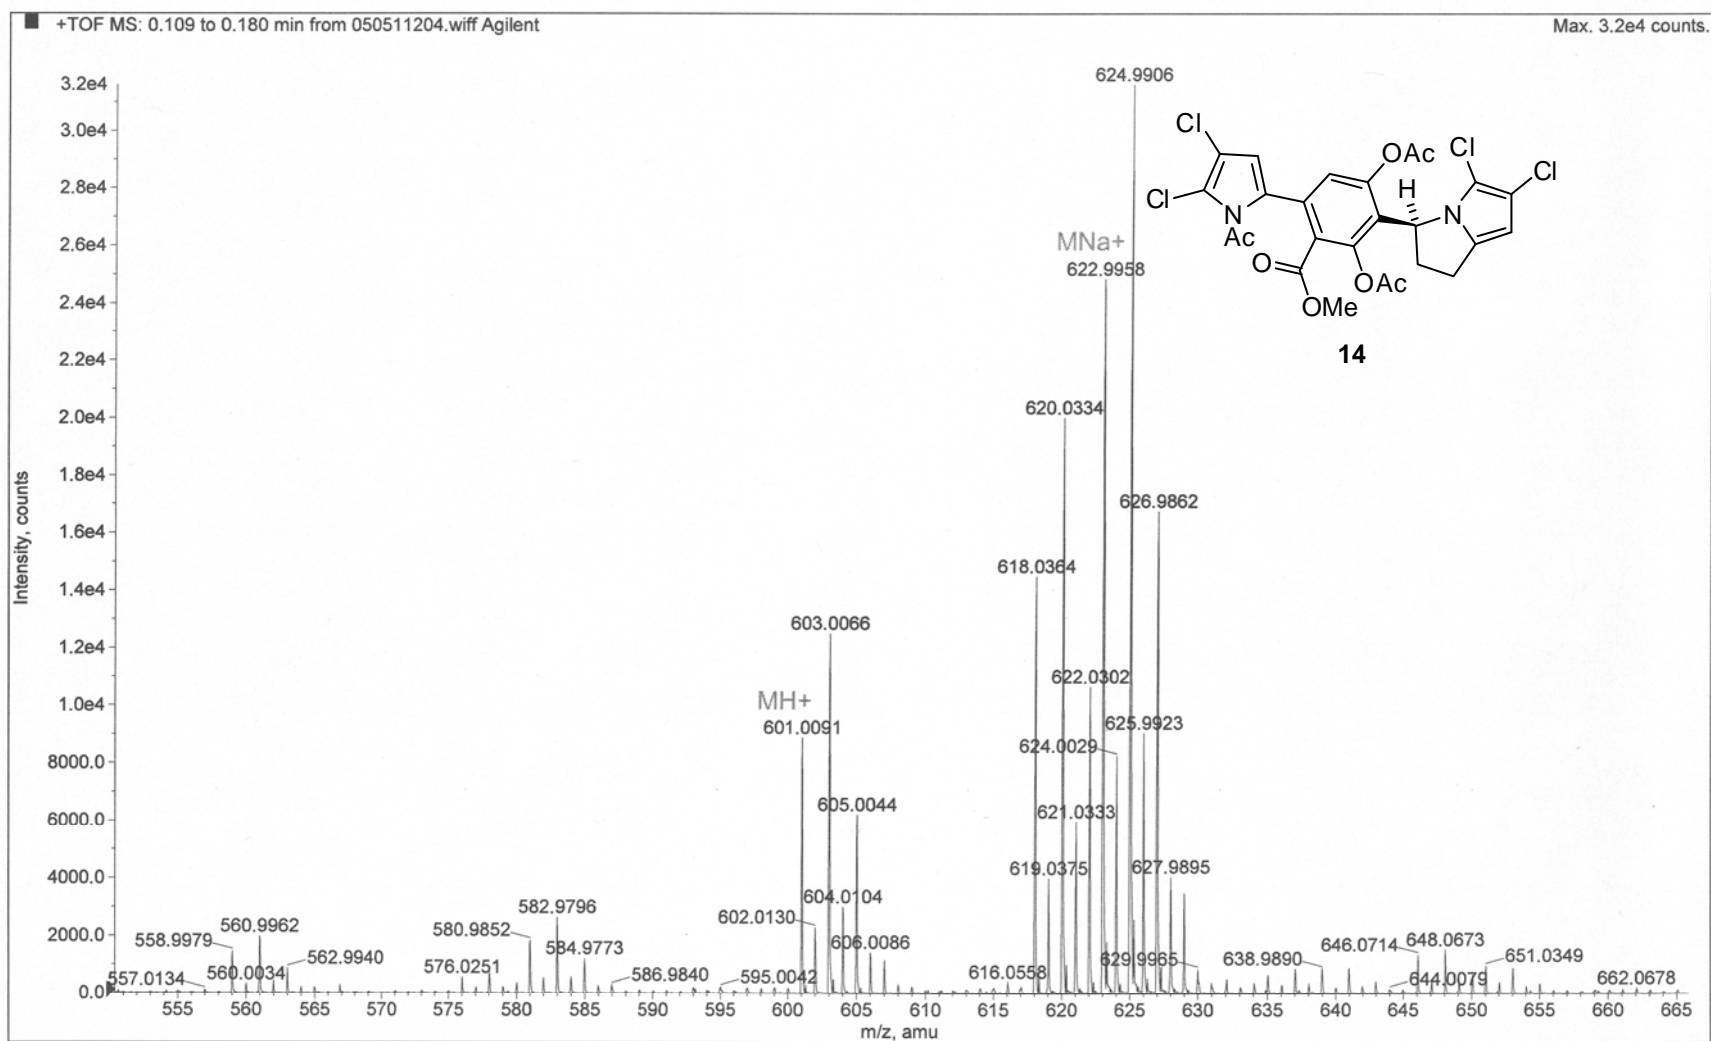



**Figure S3.** LC/(-)-LRESI-MS chromatogram of chlorizidine (**1**) in pH 10 buffer

C:\Xcalibur\...july5pH10NH4CIN1

7/5/2011 1:55:47 PM

RT: 3.00 - 24.00

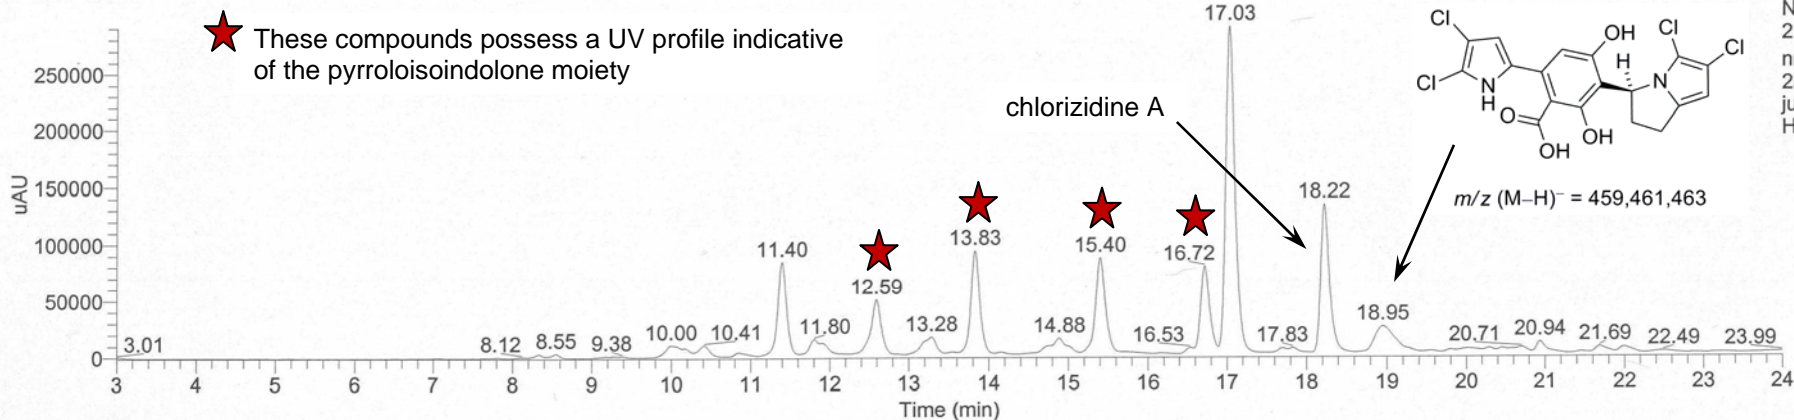

RT: 3.00 - 24.00

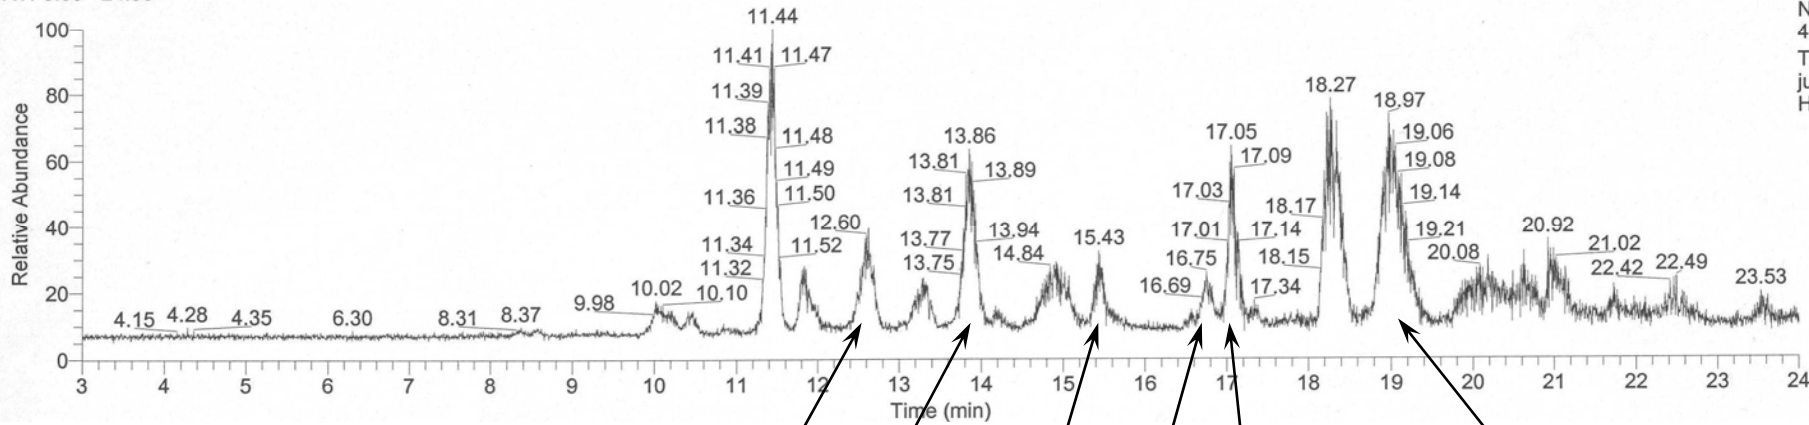

$m/z = 405,407,409; 423,425,427$

$m/z = 403,405,407; 439,441,443$

$m/z = 387,388$

$m/z = 373,375,377; 437,439,441$

$m/z = 420,423,425$

$m/z = 459,461,463$

**Figure S4.** X-Ray structure of chlorizidine A (**1**)

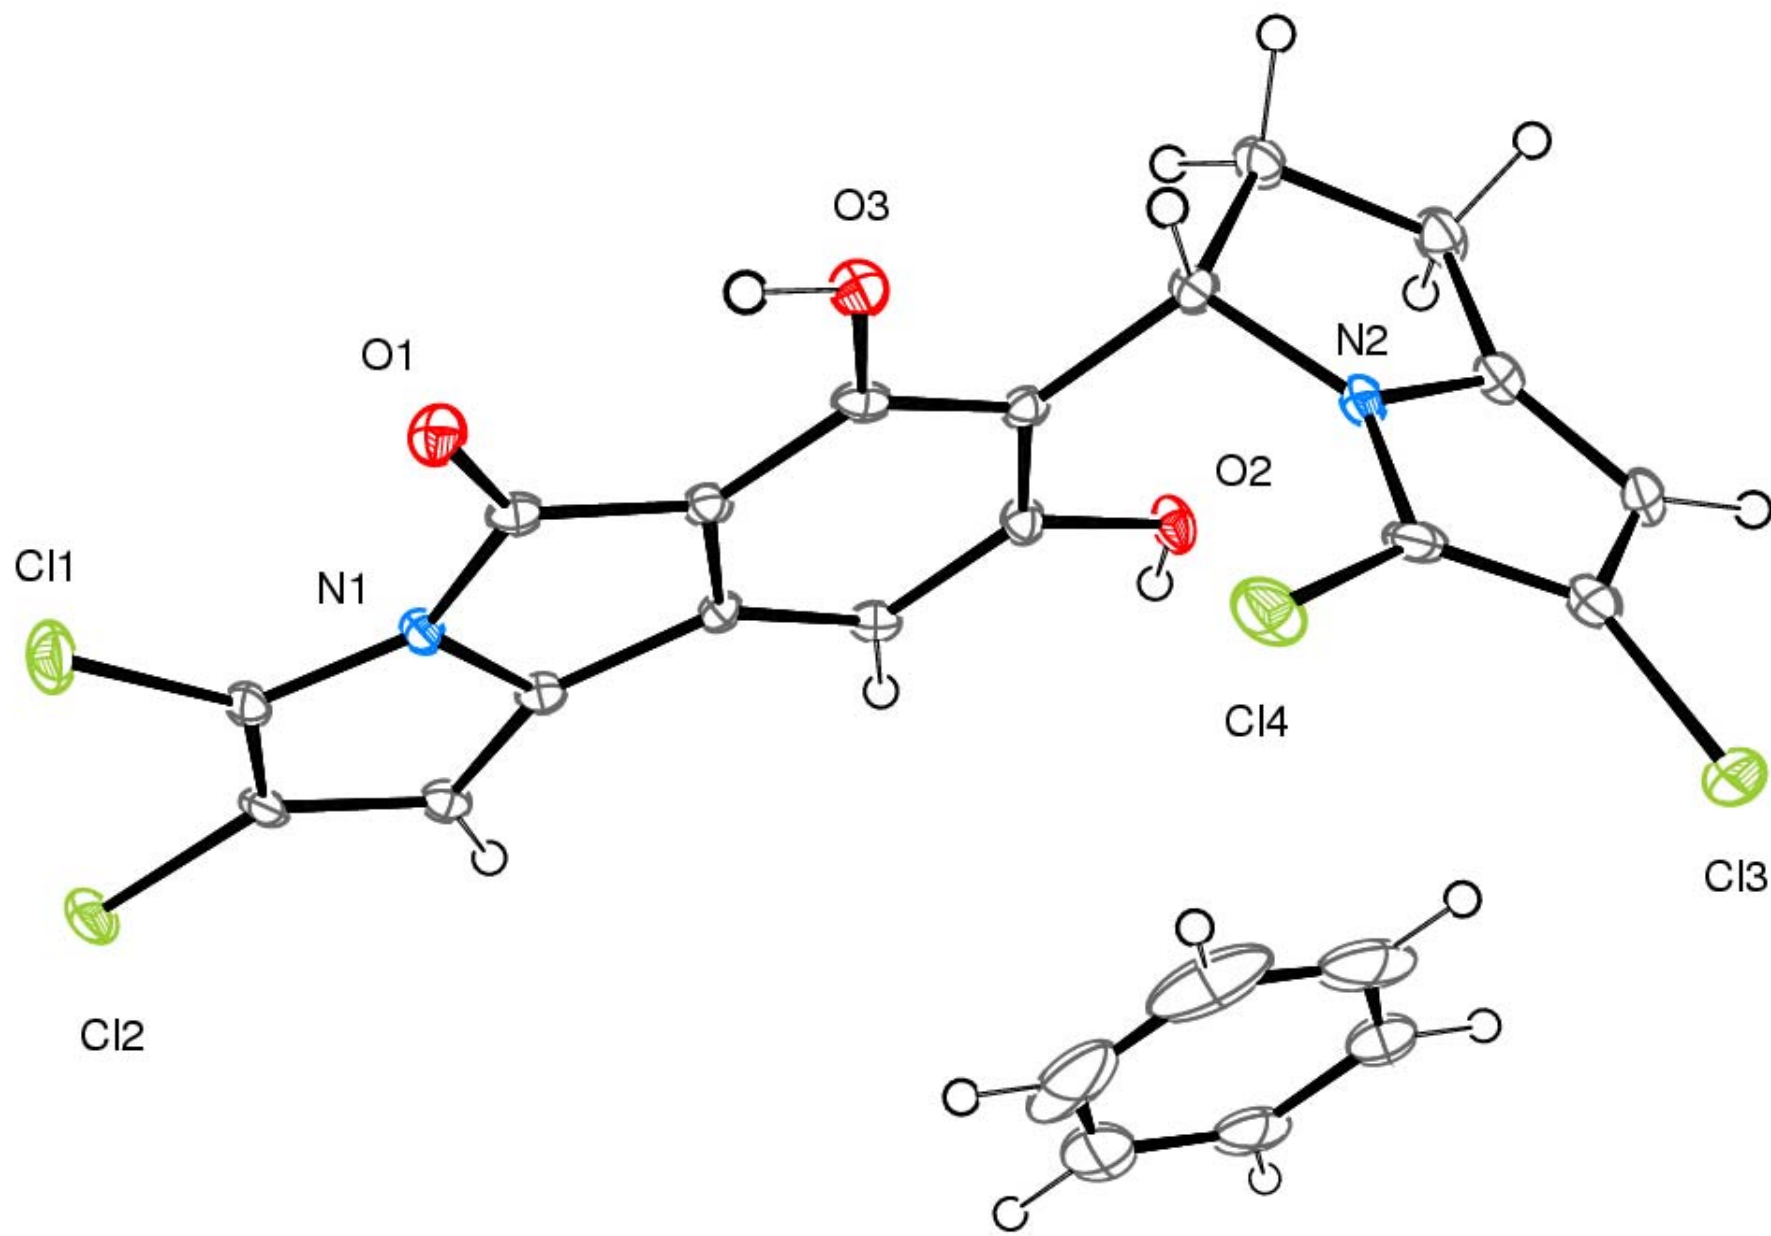

**Figure S5.** X-Ray structure of diacetyl chlorizidine A (2)

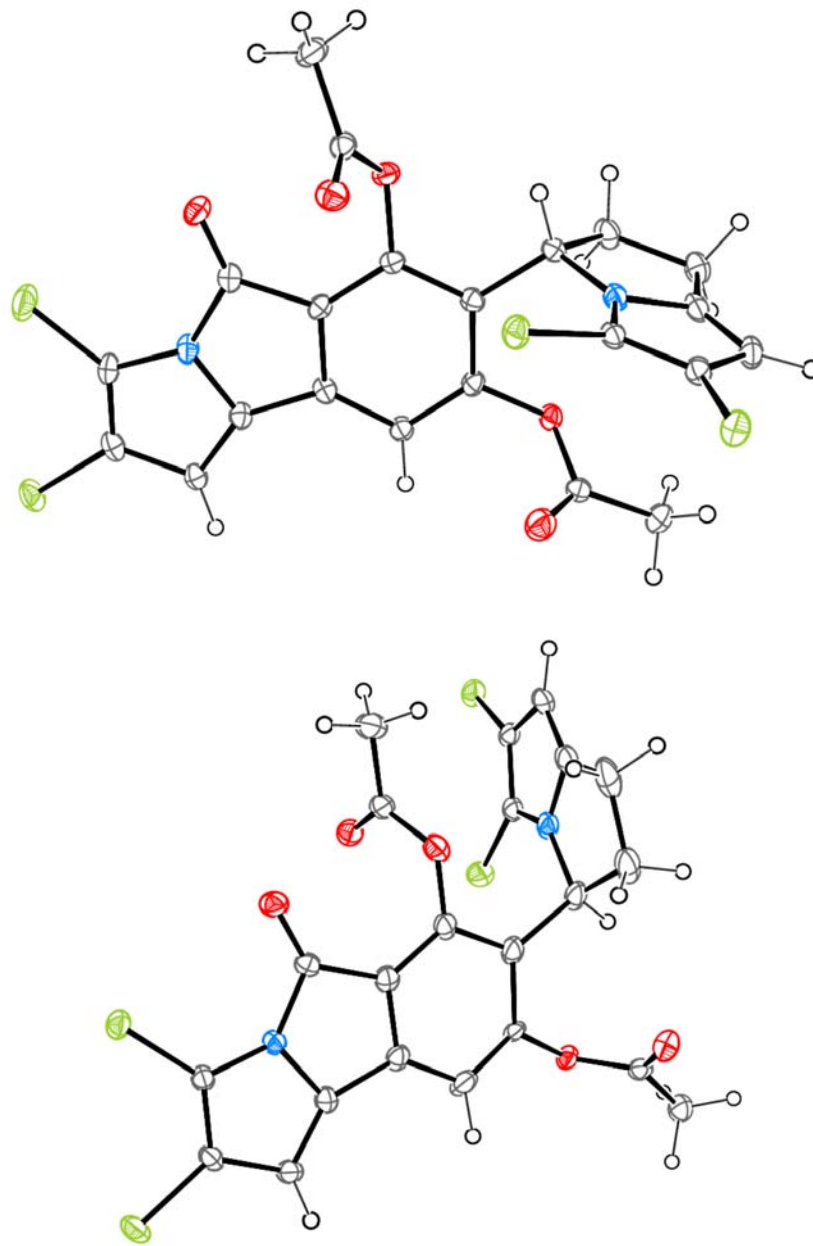

# Developmental Therapeutics Program

NSC: D-754768 / 1

Conc: 1.00E-5 Molar

Test Date: Nov 01, 2010

## One Dose Mean Graph

Experiment ID: 1011OS45

Report Date: Dec 03, 2010

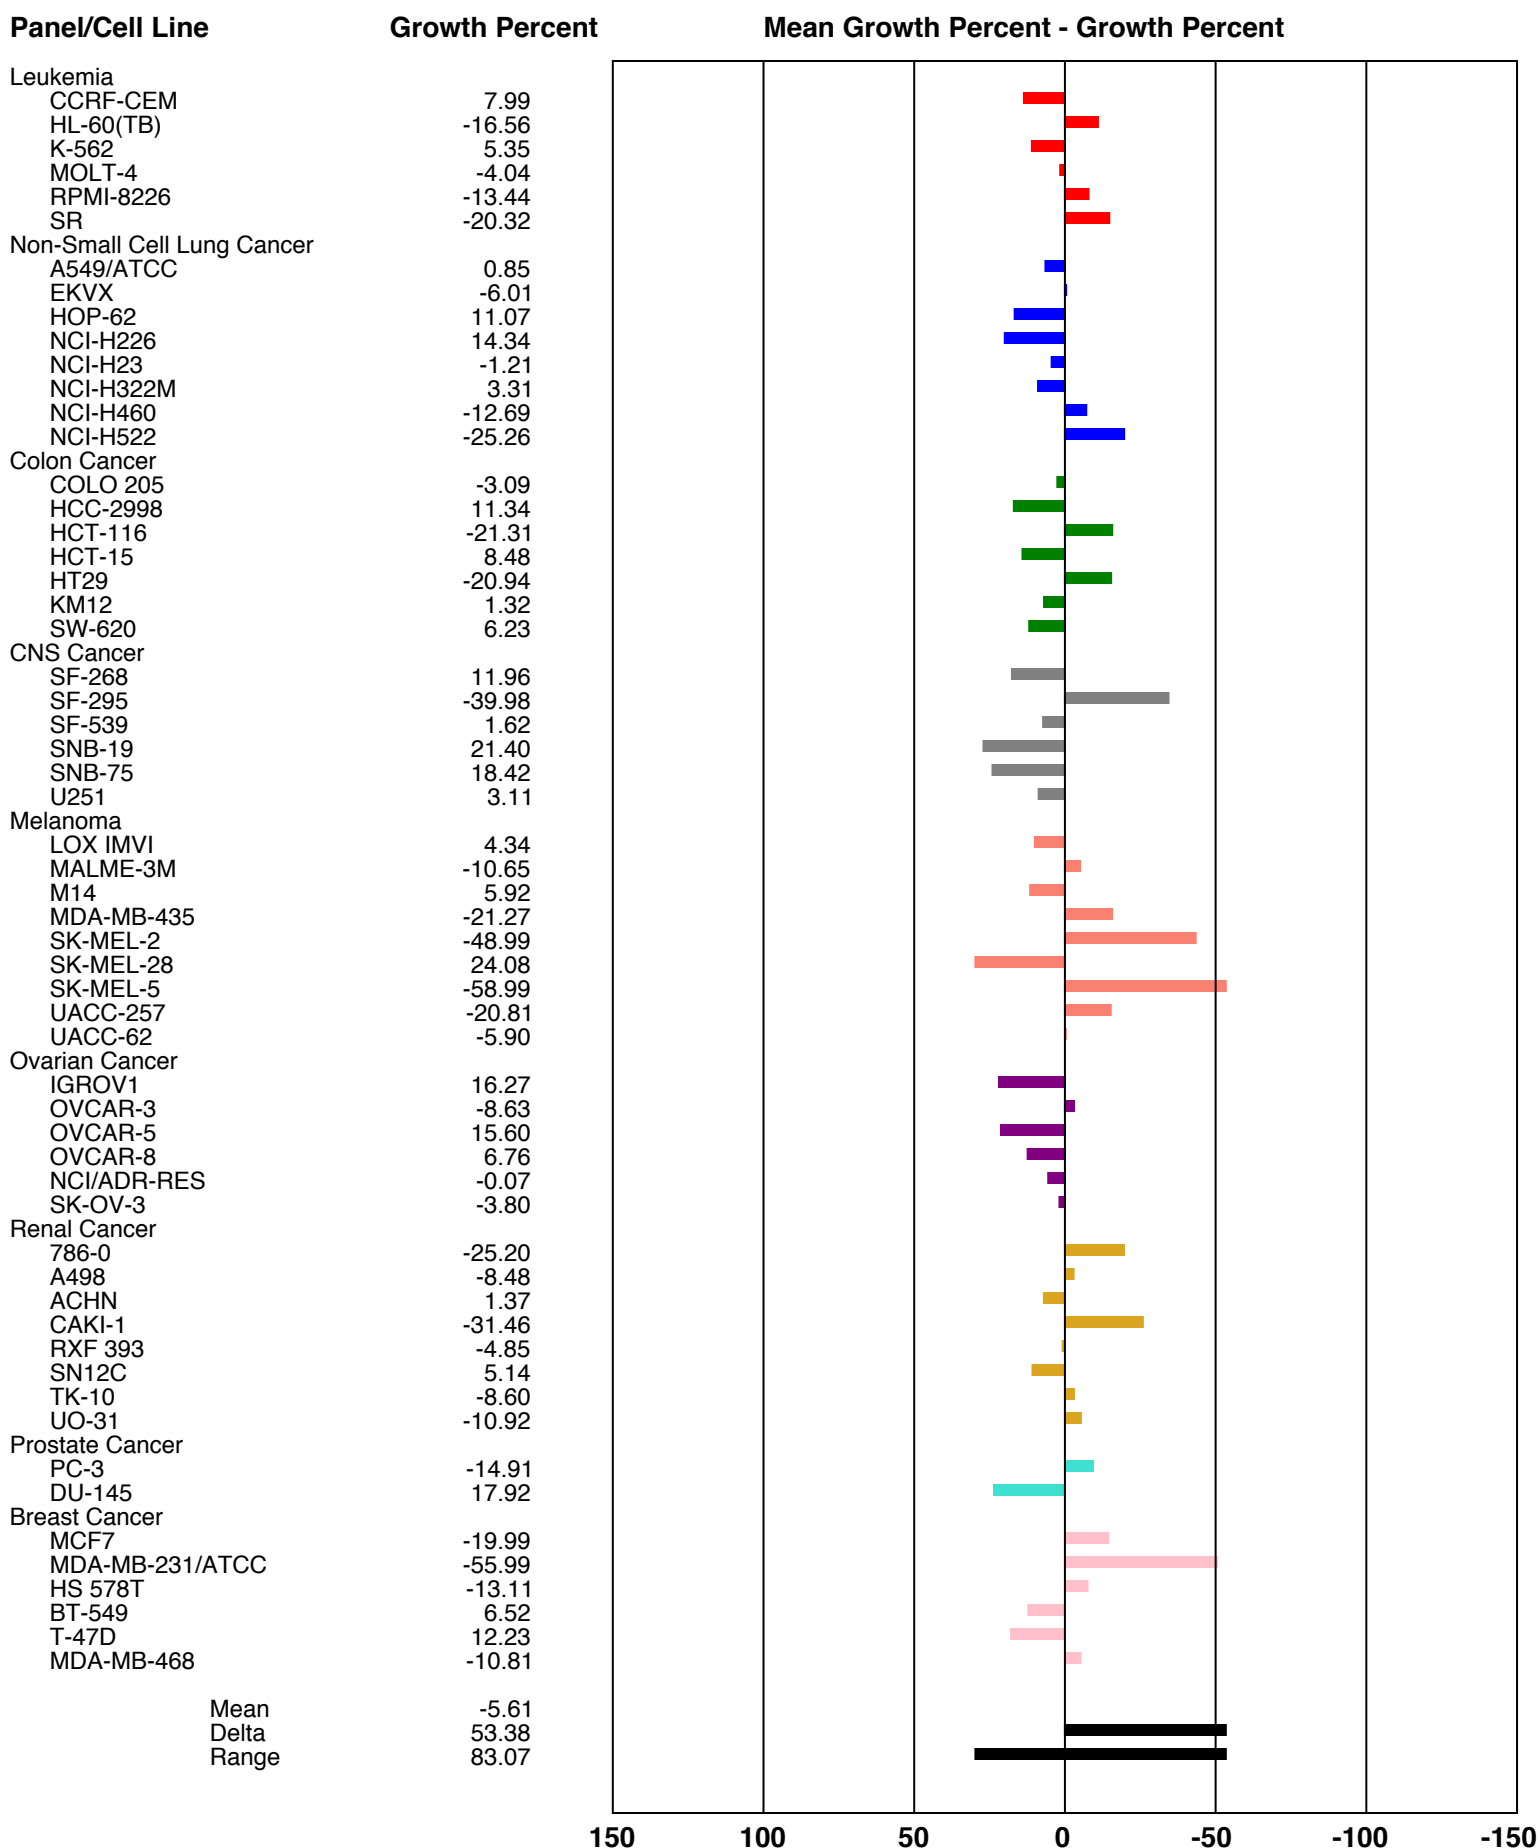

150 100 50 0 -50 -100 -150

Dose Response Curves

Report Date:February 01, 2011

Test Date:December 06, 2010

All Cell Lines

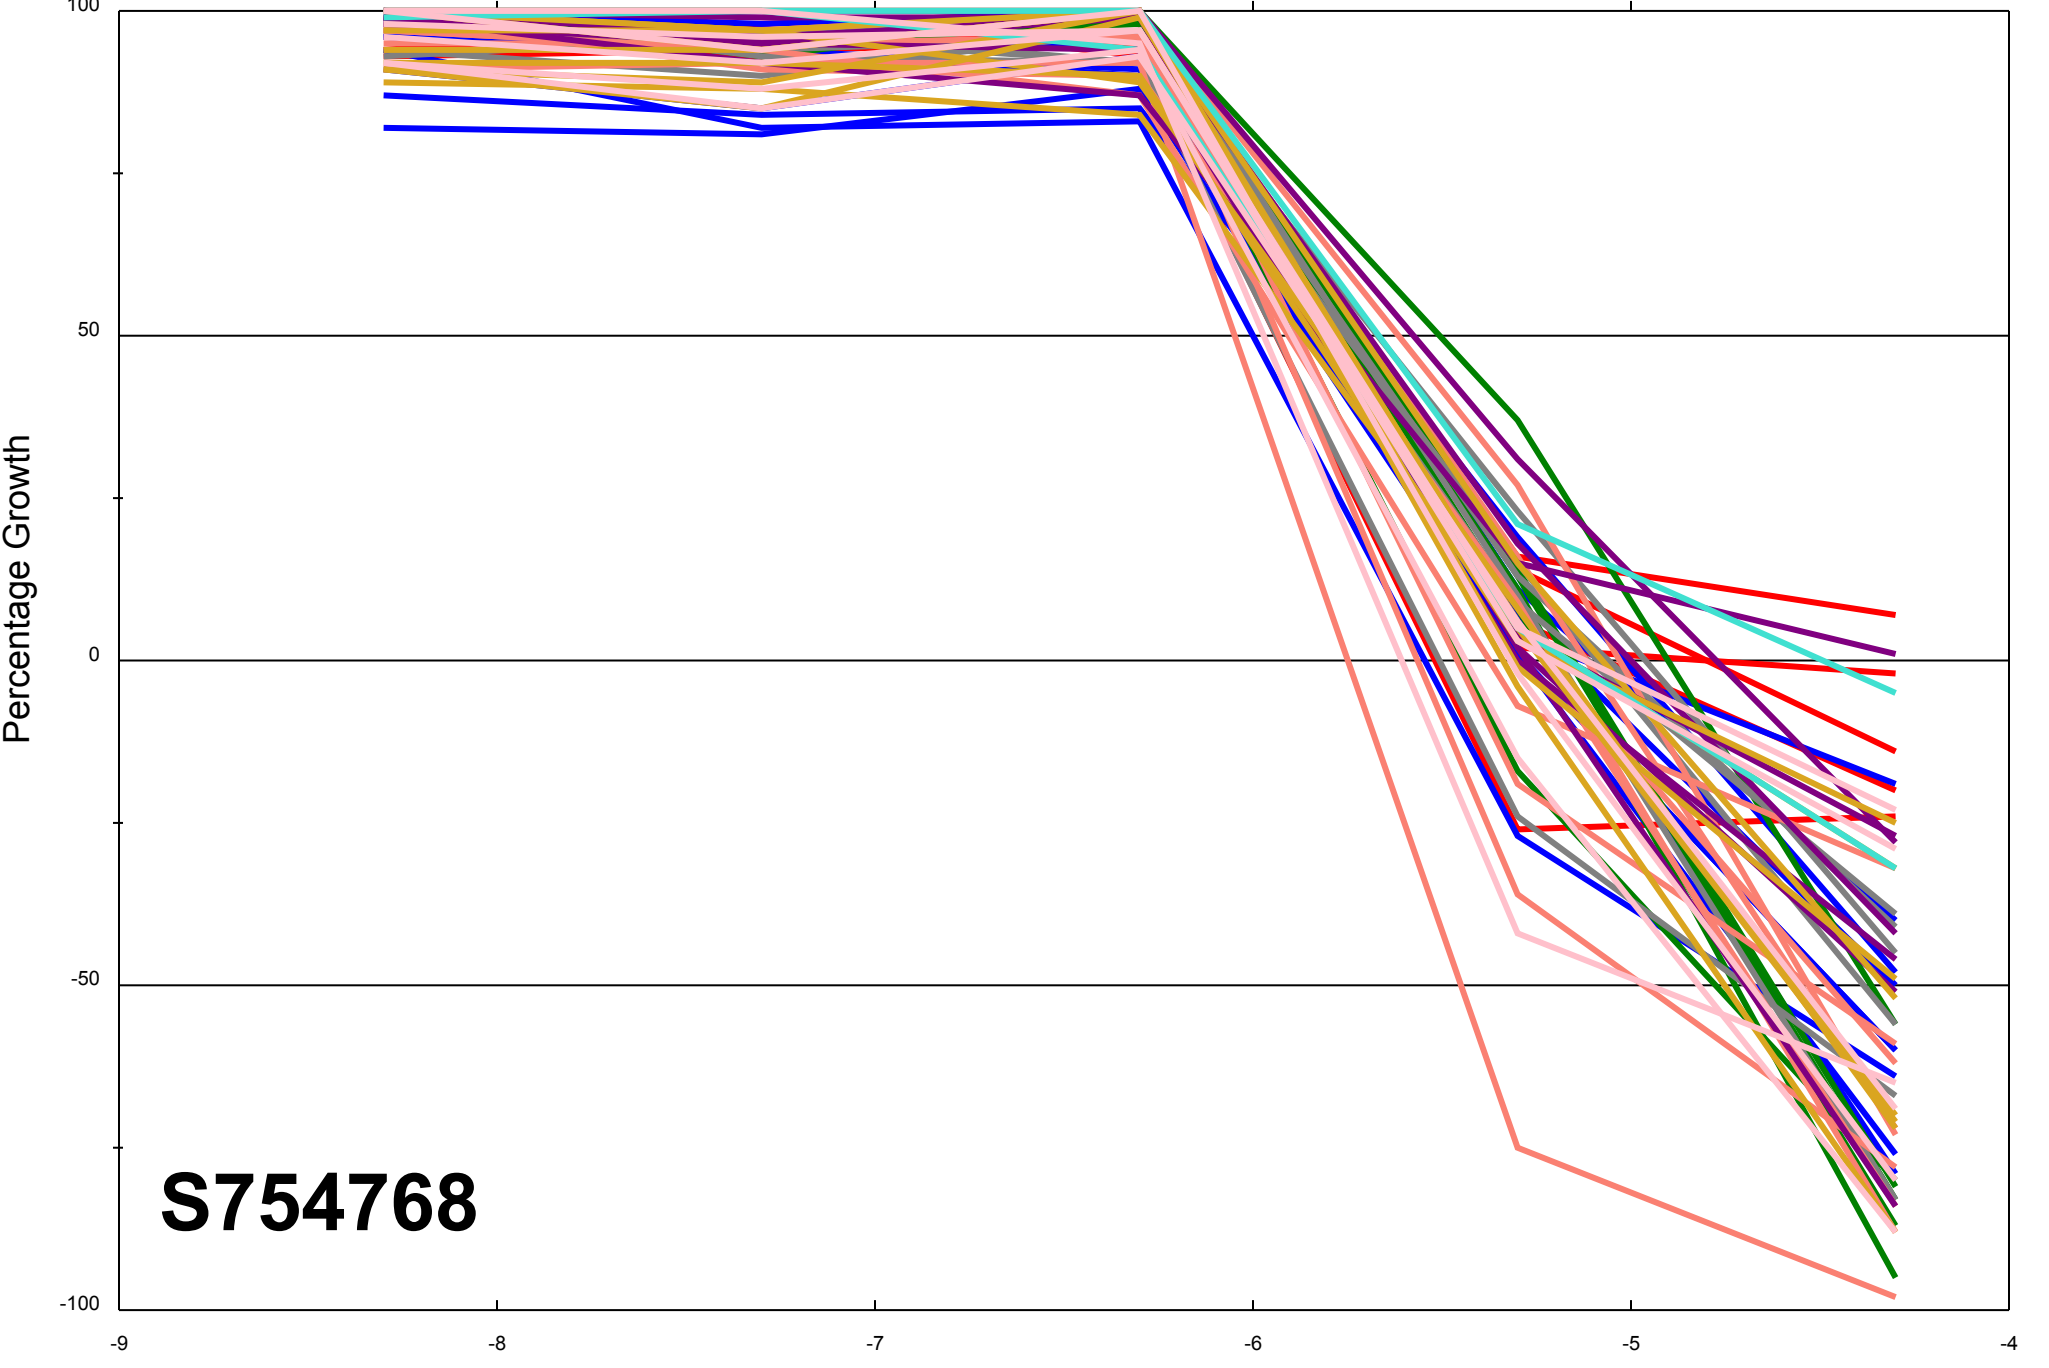

**S754768**

Log<sub>10</sub> of Sample Concentration (Molar)

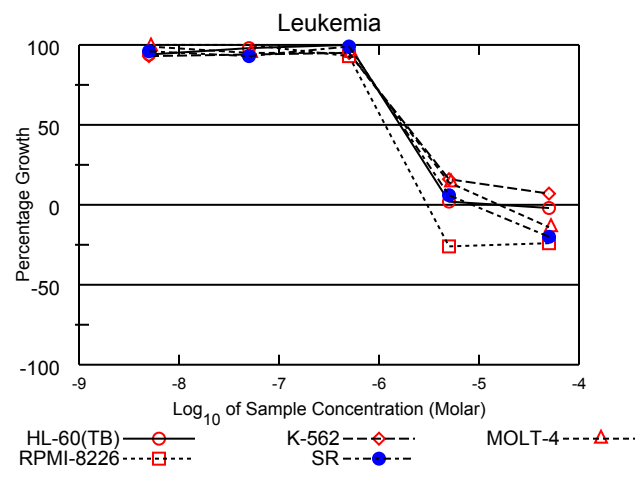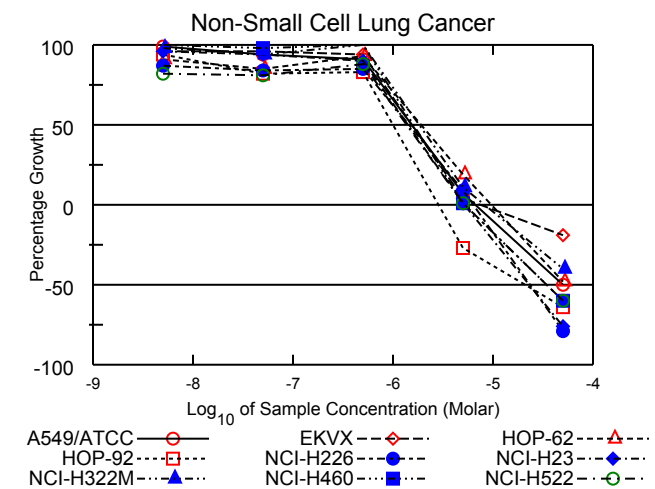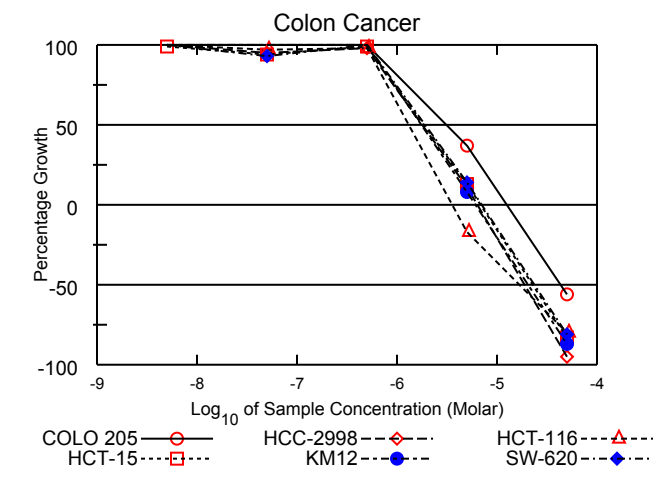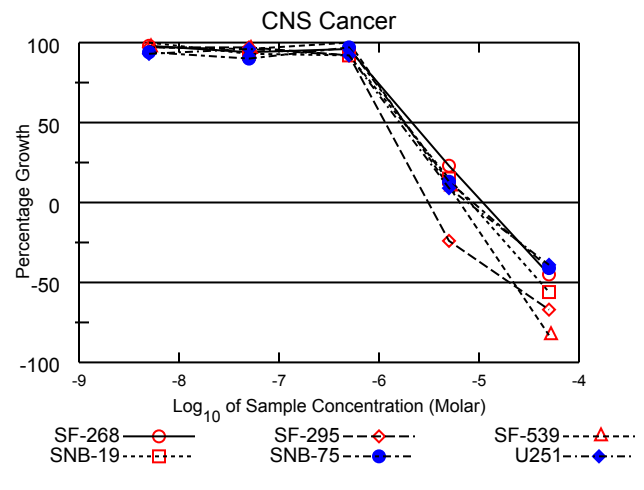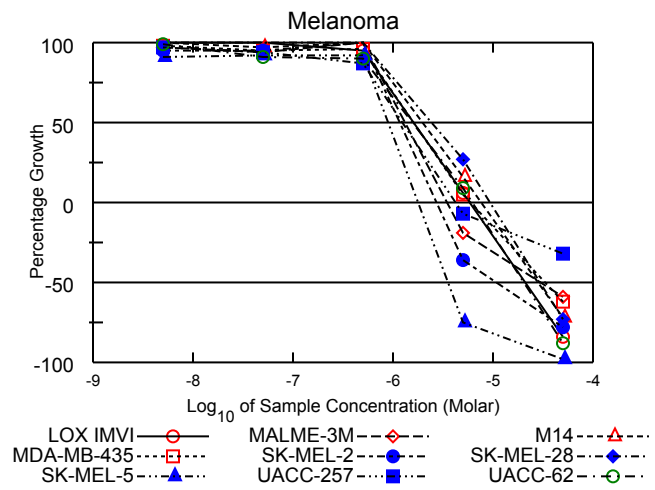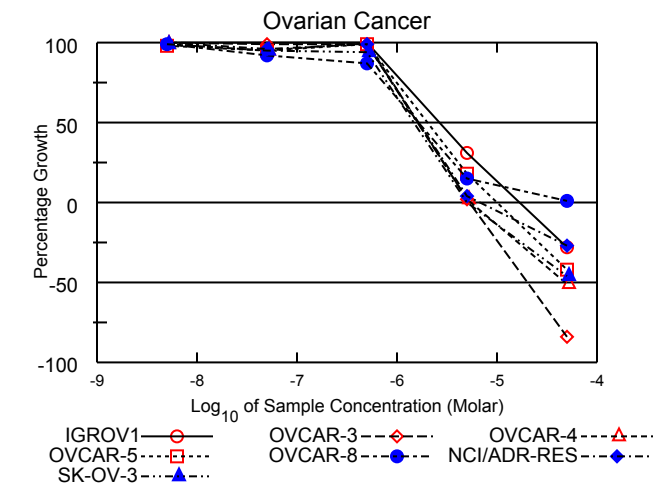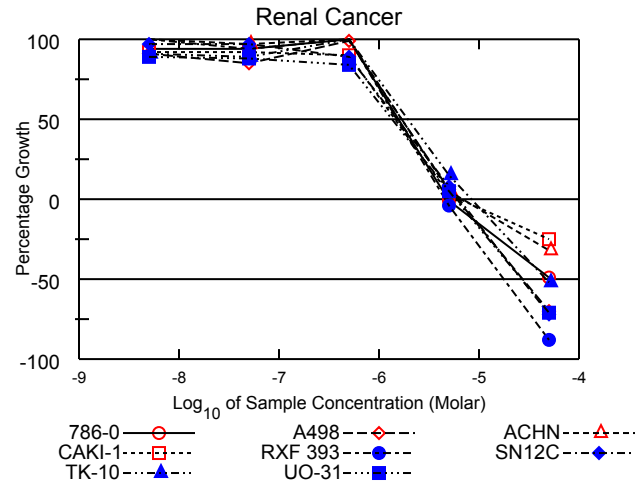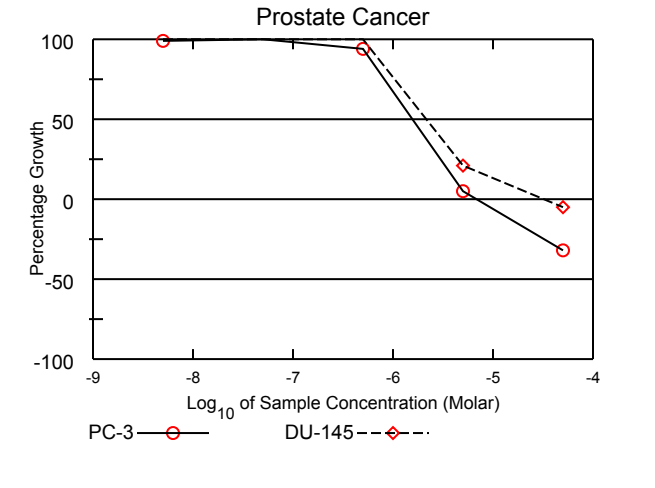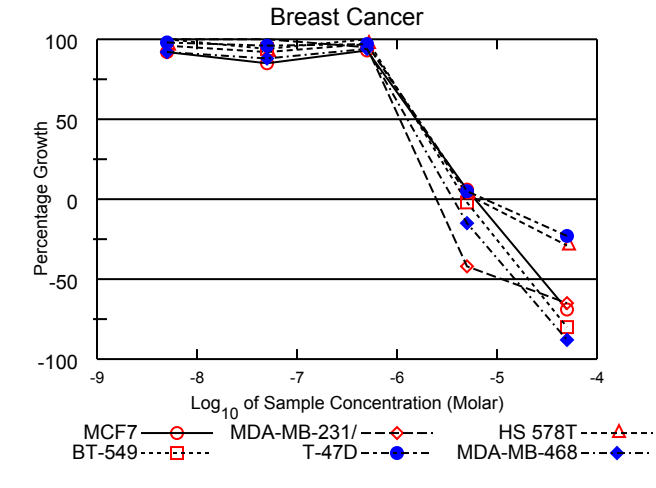

# National Cancer Institute Developmental Therapeutics Program In-Vitro Testing Results

|                                  |                                       |                |               |
|----------------------------------|---------------------------------------|----------------|---------------|
| NSC : D - 754768 / 1             | Experiment ID : 1012NS49              | Test Type : 08 | Units : Molar |
| Report Date : February 01, 2011  | Test Date : December 06, 2010         | QNS :          | MC :          |
| COMI : CNH287.528_SS_XM (100117) | Stain Reagent : SRB Dual-Pass Related | SSPL : 075T    |               |

| Panel/Cell Line                   | Log10 Concentration |       |       |       |       |       |       |      |      |      |      |      | GI50    | TGI       | LC50      |
|-----------------------------------|---------------------|-------|-------|-------|-------|-------|-------|------|------|------|------|------|---------|-----------|-----------|
|                                   | Time Zero           | Ctrl  | -8.3  | -7.3  | -6.3  | -5.3  | -4.3  | -8.3 | -7.3 | -6.3 | -5.3 | -4.3 |         |           |           |
| <b>Leukemia</b>                   |                     |       |       |       |       |       |       |      |      |      |      |      |         |           |           |
| HL-60(TB)                         | 0.986               | 2.925 | 2.818 | 2.883 | 2.971 | 1.031 | 0.965 | 94   | 98   | 102  | 2    | -2   | 1.67E-6 | 1.65E-5   | > 5.00E-5 |
| K-562                             | 0.187               | 1.718 | 1.603 | 1.620 | 1.648 | 0.437 | 0.291 | 93   | 94   | 95   | 16   | 7    | 1.88E-6 | > 5.00E-5 | > 5.00E-5 |
| MOLT-4                            | 0.707               | 2.625 | 2.613 | 2.528 | 2.534 | 0.972 | 0.607 | 99   | 95   | 95   | 14   | -14  | 1.80E-6 | 1.56E-5   | > 5.00E-5 |
| RPMI-8226                         | 0.773               | 2.231 | 2.265 | 2.225 | 2.125 | 0.571 | 0.590 | 102  | 100  | 93   | -26  | -24  | 1.14E-6 | 3.01E-6   | > 5.00E-5 |
| SR                                | 0.593               | 2.320 | 2.252 | 2.200 | 2.296 | 0.693 | 0.474 | 96   | 93   | 99   | 6    | -20  | 1.67E-6 | 8.36E-6   | > 5.00E-5 |
| <b>Non-Small Cell Lung Cancer</b> |                     |       |       |       |       |       |       |      |      |      |      |      |         |           |           |
| A549/ATCC                         | 0.415               | 2.088 | 2.068 | 1.982 | 1.931 | 0.538 | 0.210 | 99   | 94   | 91   | 7    | -50  | 1.54E-6 | 6.73E-6   | > 5.00E-5 |
| EKVX                              | 0.717               | 1.904 | 1.862 | 1.856 | 1.838 | 0.769 | 0.583 | 96   | 96   | 94   | 4    | -19  | 1.56E-6 | 7.72E-6   | > 5.00E-5 |
| HOP-62                            | 0.386               | 0.898 | 0.852 | 0.819 | 0.863 | 0.485 | 0.200 | 91   | 85   | 93   | 19   | -48  | 1.92E-6 | 9.64E-6   | > 5.00E-5 |
| HOP-92                            | 1.057               | 1.512 | 1.485 | 1.431 | 1.433 | 0.768 | 0.376 | 94   | 82   | 83   | -27  | -64  | 9.92E-7 | 2.82E-6   | 2.04E-5   |
| NCI-H226                          | 0.508               | 1.261 | 1.160 | 1.138 | 1.152 | 0.573 | 0.109 | 87   | 84   | 85   | 9    | -79  | 1.45E-6 | 6.28E-6   | 2.35E-5   |
| NCI-H23                           | 0.483               | 1.631 | 1.590 | 1.557 | 1.521 | 0.498 | 0.117 | 96   | 94   | 90   | 1    | -76  | 1.42E-6 | 5.20E-6   | 2.31E-5   |
| NCI-H322M                         | 0.767               | 1.697 | 1.679 | 1.641 | 1.718 | 0.870 | 0.463 | 98   | 94   | 102  | 11   | -40  | 1.87E-6 | 8.26E-6   | > 5.00E-5 |
| NCI-H460                          | 0.228               | 2.072 | 2.071 | 2.041 | 2.118 | 0.253 | 0.091 | 100  | 98   | 103  | 1    | -60  | 1.65E-6 | 5.26E-6   | 3.43E-5   |
| NCI-H522                          | 0.614               | 1.548 | 1.385 | 1.373 | 1.434 | 0.620 | 0.247 | 82   | 81   | 88   | 1    | -60  | 1.36E-6 | 5.12E-6   | 3.44E-5   |
| <b>Colon Cancer</b>               |                     |       |       |       |       |       |       |      |      |      |      |      |         |           |           |
| COLO 205                          | 0.257               | 0.965 | 1.003 | 0.963 | 0.967 | 0.517 | 0.113 | 105  | 100  | 100  | 37   | -56  | 3.09E-6 | 1.24E-5   | 4.29E-5   |
| HCC-2998                          | 0.948               | 2.808 | 2.845 | 2.722 | 2.763 | 1.152 | 0.049 | 102  | 95   | 98   | 11   | -95  | 1.77E-6 | 6.34E-6   | 1.88E-5   |
| HCT-116                           | 0.267               | 1.841 | 1.879 | 1.796 | 1.810 | 0.222 | 0.054 | 102  | 97   | 98   | -17  | -80  | 1.31E-6 | 3.57E-6   | 1.68E-5   |
| HCT-15                            | 0.265               | 1.639 | 1.629 | 1.556 | 1.623 | 0.446 | 0.046 | 99   | 94   | 99   | 13   | -83  | 1.86E-6 | 6.86E-6   | 2.28E-5   |
| KM12                              | 0.302               | 1.529 | 1.549 | 1.541 | 1.544 | 0.402 | 0.040 | 102  | 101  | 101  | 8    | -87  | 1.77E-6 | 6.09E-6   | 2.05E-5   |
| SW-620                            | 0.186               | 1.193 | 1.197 | 1.128 | 1.194 | 0.327 | 0.036 | 100  | 93   | 100  | 14   | -81  | 1.91E-6 | 7.02E-6   | 2.36E-5   |
| <b>CNS Cancer</b>                 |                     |       |       |       |       |       |       |      |      |      |      |      |         |           |           |
| SF-268                            | 0.379               | 1.389 | 1.366 | 1.327 | 1.352 | 0.609 | 0.210 | 98   | 94   | 96   | 23   | -45  | 2.13E-6 | 1.09E-5   | > 5.00E-5 |
| SF-295                            | 0.884               | 2.778 | 2.728 | 2.727 | 2.631 | 0.673 | 0.288 | 97   | 97   | 92   | -24  | -67  | 1.16E-6 | 3.11E-6   | 1.99E-5   |
| SF-539                            | 0.634               | 1.706 | 1.669 | 1.658 | 1.718 | 0.737 | 0.107 | 97   | 96   | 101  | 10   | -83  | 1.81E-6 | 6.35E-6   | 2.20E-5   |
| SNB-19                            | 0.342               | 1.292 | 1.317 | 1.226 | 1.215 | 0.480 | 0.149 | 103  | 93   | 92   | 15   | -56  | 1.74E-6 | 8.01E-6   | 4.06E-5   |
| SNB-75                            | 0.585               | 1.133 | 1.099 | 1.076 | 1.118 | 0.657 | 0.346 | 94   | 90   | 97   | 13   | -41  | 1.83E-6 | 8.76E-6   | > 5.00E-5 |
| U251                              | 0.264               | 1.416 | 1.341 | 1.373 | 1.325 | 0.366 | 0.160 | 93   | 96   | 92   | 9    | -39  | 1.60E-6 | 7.62E-6   | > 5.00E-5 |
| <b>Melanoma</b>                   |                     |       |       |       |       |       |       |      |      |      |      |      |         |           |           |
| LOX IMVI                          | 0.172               | 1.225 | 1.236 | 1.223 | 1.168 | 0.235 | 0.027 | 101  | 100  | 95   | 6    | -84  | 1.59E-6 | 5.82E-6   | 2.08E-5   |
| MALME-3M                          | 0.593               | 1.019 | 1.005 | 0.992 | 1.021 | 0.478 | 0.244 | 97   | 94   | 100  | -19  | -59  | 1.32E-6 | 3.44E-6   | 2.98E-5   |
| M14                               | 0.304               | 1.075 | 1.105 | 1.050 | 1.113 | 0.426 | 0.085 | 104  | 97   | 105  | 16   | -72  | 2.06E-6 | 7.55E-6   | 2.80E-5   |
| MDA-MB-435                        | 0.401               | 1.850 | 1.819 | 1.776 | 1.793 | 0.474 | 0.153 | 98   | 95   | 96   | 5    | -62  | 1.60E-6 | 5.95E-6   | 3.33E-5   |
| SK-MEL-2                          | 0.896               | 1.739 | 1.694 | 1.700 | 1.790 | 0.573 | 0.193 | 95   | 95   | 106  | -36  | -78  | 1.24E-6 | 2.79E-6   | 1.06E-5   |
| SK-MEL-28                         | 0.383               | 0.891 | 0.914 | 0.896 | 0.948 | 0.519 | 0.102 | 104  | 101  | 111  | 27   | -73  | 2.65E-6 | 9.25E-6   | 2.91E-5   |
| SK-MEL-5                          | 0.464               | 2.591 | 2.402 | 2.424 | 2.420 | 0.117 | 0.010 | 91   | 92   | 92   | -75  | -98  | 8.93E-7 | 1.78E-6   | 3.55E-5   |
| UACC-257                          | 0.669               | 1.647 | 1.619 | 1.585 | 1.523 | 0.621 | 0.456 | 97   | 94   | 87   | -7   | -32  | 1.24E-6 | 4.20E-6   | > 5.00E-5 |
| UACC-62                           | 0.591               | 2.068 | 2.058 | 1.935 | 1.921 | 0.728 | 0.074 | 99   | 91   | 90   | 9    | -88  | 1.57E-6 | 6.23E-6   | 2.05E-5   |
| <b>Ovarian Cancer</b>             |                     |       |       |       |       |       |       |      |      |      |      |      |         |           |           |
| IGROV1                            | 0.575               | 1.727 | 1.778 | 1.746 | 1.782 | 0.935 | 0.412 | 104  | 102  | 105  | 31   | -28  | 2.78E-6 | 1.67E-5   | > 5.00E-5 |
| OVCAR-3                           | 0.341               | 1.026 | 1.038 | 1.021 | 1.016 | 0.357 | 0.056 | 102  | 99   | 99   | 2    | -84  | 1.60E-6 | 5.31E-6   | 2.03E-5   |
| OVCAR-4                           | 0.589               | 1.033 | 1.029 | 1.009 | 1.102 | 0.600 | 0.288 | 99   | 95   | 116  | 2    | -51  | 1.90E-6 | 5.56E-6   | 4.75E-5   |
| OVCAR-5                           | 0.463               | 1.188 | 1.171 | 1.149 | 1.178 | 0.593 | 0.271 | 98   | 95   | 99   | 18   | -42  | 2.00E-6 | 1.00E-5   | > 5.00E-5 |
| OVCAR-8                           | 0.122               | 0.590 | 0.583 | 0.554 | 0.528 | 0.190 | 0.126 | 99   | 92   | 87   | 15   | 1    | 1.62E-6 | > 5.00E-5 | > 5.00E-5 |
| NCI/ADR-RES                       | 0.406               | 1.497 | 1.504 | 1.455 | 1.486 | 0.446 | 0.298 | 101  | 96   | 99   | 4    | -27  | 1.63E-6 | 6.59E-6   | > 5.00E-5 |
| SK-OV-3                           | 0.639               | 1.561 | 1.548 | 1.515 | 1.503 | 0.643 | 0.348 | 99   | 95   | 94   | .    | -46  | 1.47E-6 | 5.11E-6   | > 5.00E-5 |
| <b>Renal Cancer</b>               |                     |       |       |       |       |       |       |      |      |      |      |      |         |           |           |
| 786-0                             | 0.661               | 2.073 | 1.990 | 1.989 | 2.111 | 0.656 | 0.337 | 94   | 94   | 103  | -1   | -49  | 1.62E-6 | 4.92E-6   | > 5.00E-5 |
| A498                              | 0.498               | 0.987 | 0.944 | 0.916 | 0.981 | 0.527 | 0.148 | 91   | 85   | 99   | 6    | -70  | 1.67E-6 | 5.96E-6   | 2.71E-5   |
| ACHN                              | 0.497               | 1.852 | 1.907 | 1.817 | 1.881 | 0.560 | 0.337 | 104  | 97   | 102  | 5    | -32  | 1.71E-6 | 6.67E-6   | > 5.00E-5 |
| CAKI-1                            | 0.716               | 2.470 | 2.329 | 2.333 | 2.293 | 0.763 | 0.541 | 92   | 92   | 90   | 3    | -25  | 1.43E-6 | 6.26E-6   | > 5.00E-5 |
| RXF 393                           | 0.655               | 1.164 | 1.164 | 1.132 | 1.161 | 0.632 | 0.082 | 100  | 94   | 100  | -4   | -88  | 1.51E-6 | 4.62E-6   | 1.79E-5   |
| SN12C                             | 0.398               | 1.599 | 1.567 | 1.569 | 1.467 | 0.491 | 0.112 | 97   | 97   | 89   | 8    | -72  | 1.51E-6 | 6.25E-6   | 2.65E-5   |
| TK-10                             | 0.548               | 1.229 | 1.166 | 1.154 | 1.314 | 0.654 | 0.266 | 91   | 89   | 112  | 15   | -52  | 2.20E-6 | 8.51E-6   | 4.74E-5   |
| UO-31                             | 0.615               | 1.501 | 1.406 | 1.392 | 1.361 | 0.657 | 0.177 | 89   | 88   | 84   | 5    | -71  | 1.35E-6 | 5.76E-6   | 2.62E-5   |
| <b>Prostate Cancer</b>            |                     |       |       |       |       |       |       |      |      |      |      |      |         |           |           |
| PC-3                              | 0.451               | 1.716 | 1.698 | 1.722 | 1.637 | 0.515 | 0.305 | 99   | 100  | 94   | 5    | -32  | 1.56E-6 | 6.80E-6   | > 5.00E-5 |
| DU-145                            | 0.241               | 0.936 | 0.934 | 0.957 | 0.960 | 0.386 | 0.230 | 100  | 103  | 103  | 21   | -5   | 2.22E-6 | 3.26E-5   | > 5.00E-5 |
| <b>Breast Cancer</b>              |                     |       |       |       |       |       |       |      |      |      |      |      |         |           |           |
| MCF7                              | 0.284               | 1.200 | 1.127 | 1.066 | 1.136 | 0.338 | 0.087 | 92   | 85   | 93   | 6    | -69  | 1.56E-6 | 5.99E-6   | 2.76E-5   |
| MDA-MB-231/ATCC                   | 0.430               | 1.041 | 1.045 | 1.055 | 1.011 | 0.250 | 0.152 | 101  | 102  | 95   | -42  | -65  | 1.07E-6 | 2.47E-6   | 1.13E-5   |
| HS 578T                           | 0.812               | 1.671 | 1.639 | 1.602 | 1.642 | 0.834 | 0.574 | 96   | 92   | 97   | 3    | -29  | 1.56E-6 | 5.99E-6   | > 5.00E-5 |
| BT-549                            | 0.726               | 1.283 | 1.299 | 1.249 | 1.323 | 0.709 | 0.149 | 103  | 94   | 107  | -2   | -80  | 1.66E-6 | 4.76E-6   | 2.07E-5   |
| T-47D                             | 0.647               | 1.347 | 1.336 | 1.321 | 1.327 | 0.679 | 0.501 | 98   | 96   | 97   | 5    | -23  | 1.62E-6 | 7.36E-6   | > 5.00E-5 |
| MDA-MB-468                        | 0.575               | 1.135 | 1.088 | 1.069 | 1.100 | 0.491 | 0.069 | 92   | 88   | 94   | -15  | -88  | 1.27E-6 | 3.66E-6   | 1.51E-5   |

Mean Graphs

Report Date :February 01, 2011

Test Date :December 06, 2010

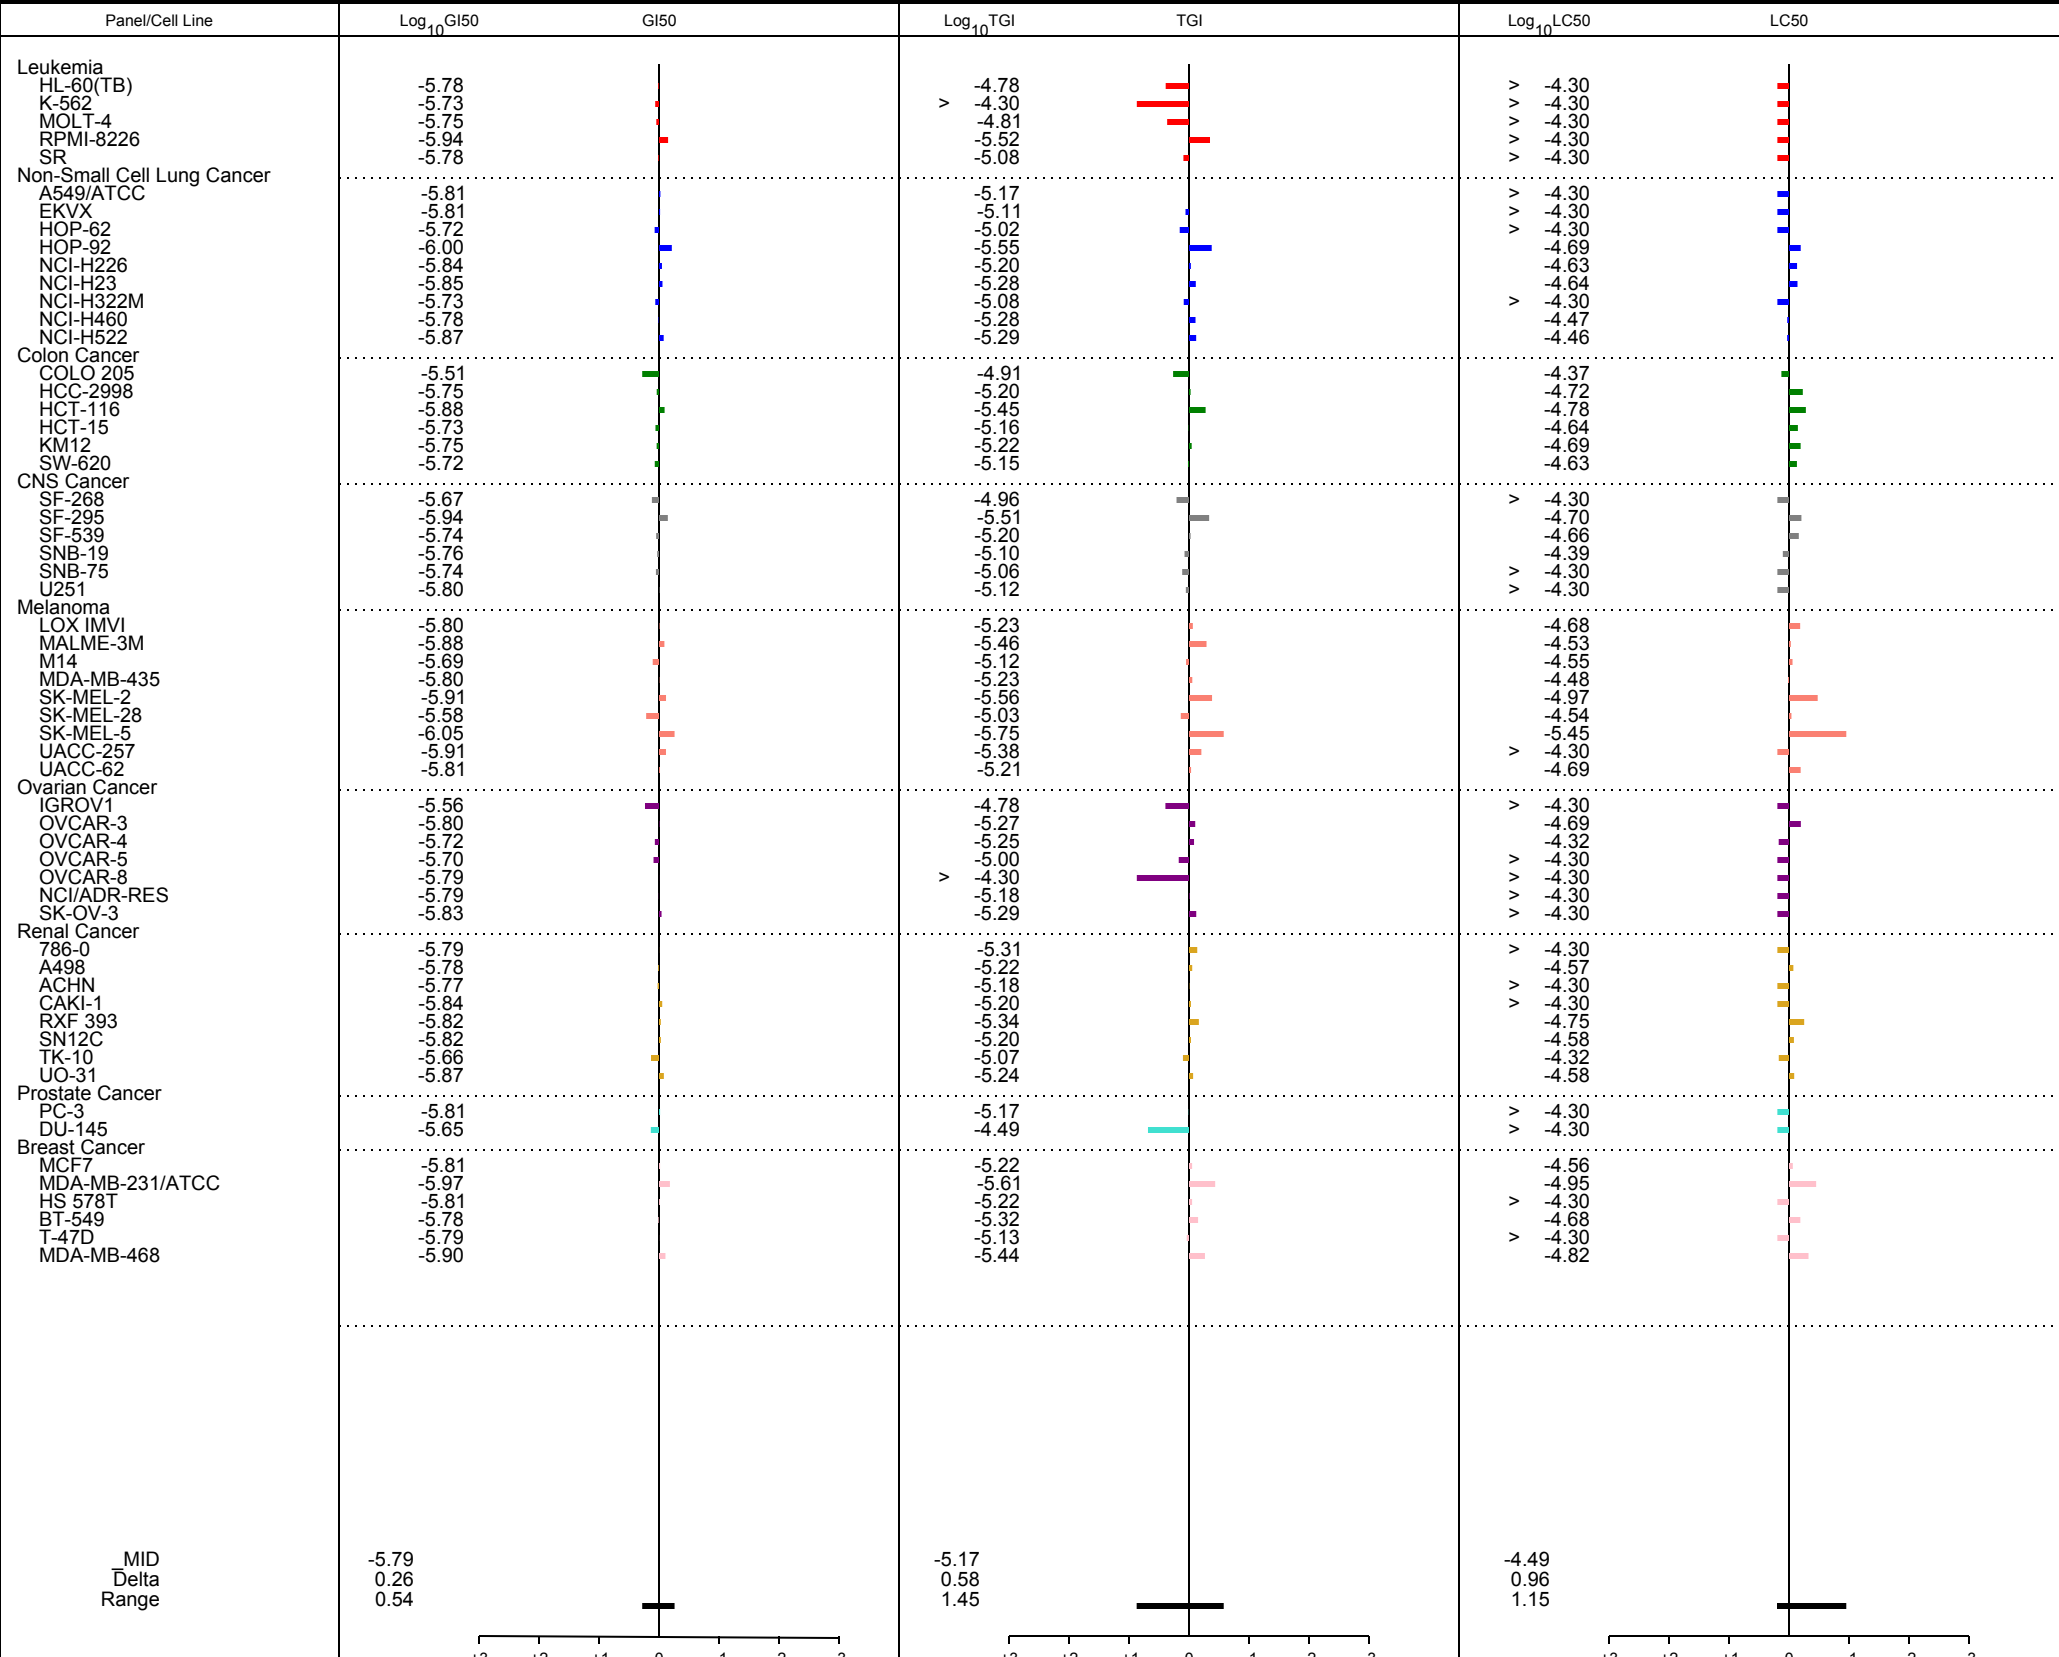

Supplement: NIHMS446055-supplement-3_si_004.pdf [file NIHMS446055-supplement-3_si_004.pdf]
